# Supplementary material
Source: publisher figshare collection journal article supplement (https://diabetesjournals.figshare.com/ndownloader/files/22905119)
Supplement: Supplementary file 1 [file 22905119]

## Online-only supplemental material

# Association of type 2 diabetes with cancer: A meta-analysis with bias analysis for unmeasured confounding in 151 cohorts comprising 32 million people

## Contents

|                                                                                                                                                                           |           |
|---------------------------------------------------------------------------------------------------------------------------------------------------------------------------|-----------|
| <b>Table S1.</b> Reasons for exclusion after full-text review .....                                                                                                       | 2         |
| <b>Table S2.</b> Characteristics of 151 included cohorts .....                                                                                                            | 6         |
| <b>Table S3.</b> Meta-analyses of all-site and site-specific cancer incidence and mortality: main analysis vs. restricted analysis .....                                  | 10        |
| <b>Table S4.</b> Meta-analyses of all-site and site-specific cancer incidence and mortality in females and males: main analysis vs. restricted analysis .....             | 11        |
| <b>Table S5.</b> Proportions of studies with an unconfounded association of type 2 diabetes with cancer: main analysis vs. restricted analysis .....                      | 12        |
| <b>Table S6.</b> Proportions of studies with an unconfounded association of type 2 diabetes with cancer in females and males: main analysis vs. restricted analysis ..... | 13        |
| <b>Figure S1.</b> Study selection diagram .....                                                                                                                           | 14        |
| <b>Figure S2.</b> Statistical analysis methodology diagram .....                                                                                                          | 15        |
| <b>Figure S3.</b> Distribution of Newcastle-Ottawa Scale score of included 151 cohorts .....                                                                              | 16        |
| <b>Figure S4a.</b> Individual and overall estimates, by cancer .....                                                                                                      | 17        |
| <b>Figure S4b.</b> Individual and overall estimates, by cancer .....                                                                                                      | 18        |
| <b>Figure S4c.</b> Individual and overall estimates, by cancer .....                                                                                                      | 19        |
| <b>Figure S5a.</b> Publication bias, by cancer .....                                                                                                                      | 20        |
| <b>Figure S5b.</b> Publication bias, by cancer .....                                                                                                                      | 21        |
| <b>Figure S6a.</b> Individual and overall estimates, by cancer and sex (Red – Females; Blue – Males) .....                                                                | 22        |
| <b>Figure S6b.</b> Individual and overall estimates, by cancer and sex (Red – Females; Blue – Males) .....                                                                | 23        |
| <b>Figure S6c.</b> Individual and overall estimates, by cancer and sex (Red – Females; Blue – Males) .....                                                                | 24        |
| <b>Figure S7a.</b> Publication bias by cancer, Females .....                                                                                                              | 25        |
| <b>Figure S7b.</b> Publication bias by cancer, Males .....                                                                                                                | 26        |
| <b>Figure S8.</b> Proportions of studies with the true effect stronger than pre-specified relative risks in Females and Males .....                                       | 27        |
| <b>Figure S9a.</b> Unmeasured confounding and proportion of studies with true effect .....                                                                                | 28        |
| <b>Figure S9b.</b> Unmeasured confounding and proportion of studies with true effect in females and males .....                                                           | 29        |
| <b>References of the 144 included studies (151 cohorts) .....</b>                                                                                                         | <b>30</b> |
| <b>PRISMA checklist .....</b>                                                                                                                                             | <b>38</b> |

**Table S1.** Reasons for exclusion after full-text review

| PMID/DOI | Exclusion reason                                                              |
|----------|-------------------------------------------------------------------------------|
| 24220915 | Not original studies (commentary/review)                                      |
| 25104789 | Not original studies (commentary/review)                                      |
| 25555822 | Not original studies (commentary/review)                                      |
| 26338721 | Not original studies (commentary/review)                                      |
| 28290049 | Not original studies (commentary/review)                                      |
| 9182981  | Not original studies (commentary/review)                                      |
| 11509114 | Irrelevant study design                                                       |
| 11714111 | Irrelevant study design                                                       |
| 12588087 | Irrelevant study design                                                       |
| 15233314 | Irrelevant study design                                                       |
| 20603278 | Irrelevant study design                                                       |
| 20956995 | Irrelevant study design                                                       |
| 21505205 | Irrelevant study design                                                       |
| 21709690 | Irrelevant study design                                                       |
| 22126502 | Irrelevant study design                                                       |
| 23112111 | Irrelevant study design                                                       |
| 25104332 | Irrelevant study design                                                       |
| 25301194 | Irrelevant study design                                                       |
| 26455587 | Irrelevant study design                                                       |
| 3998058  | Irrelevant study design                                                       |
| 16284945 | Irrelevant study design                                                       |
| 17109384 | Irrelevant study design                                                       |
| 17168202 | Irrelevant study design                                                       |
| 17220709 | Irrelevant study design                                                       |
| 17689296 | Irrelevant study design                                                       |
| 19676082 | Irrelevant study design                                                       |
| 21982487 | Irrelevant study design                                                       |
| 22161620 | Irrelevant study design                                                       |
| 28036262 | Irrelevant study design                                                       |
| 29049401 | Irrelevant study design                                                       |
| 7947103  | Irrelevant study design                                                       |
| 11991597 | Specific population (e.g. cancer patients, or HBV/HCV infected patients etc.) |
| 12784339 | Specific population (e.g. cancer patients, or HBV/HCV infected patients etc.) |
| 12960507 | Specific population (e.g. cancer patients, or HBV/HCV infected patients etc.) |
| 15350367 | Specific population (e.g. cancer patients, or HBV/HCV infected patients etc.) |
| 16844421 | Specific population (e.g. cancer patients, or HBV/HCV infected patients etc.) |
| 17230509 | Specific population (e.g. cancer patients, or HBV/HCV infected patients etc.) |
| 17509946 | Specific population (e.g. cancer patients, or HBV/HCV infected patients etc.) |
| 17539994 | Specific population (e.g. cancer patients, or HBV/HCV infected patients etc.) |
| 18387499 | Specific population (e.g. cancer patients, or HBV/HCV infected patients etc.) |
| 18506898 | Specific population (e.g. cancer patients, or HBV/HCV infected patients etc.) |
| 18679071 | Specific population (e.g. cancer patients, or HBV/HCV infected patients etc.) |
| 18854000 | Specific population (e.g. cancer patients, or HBV/HCV infected patients etc.) |
| 19085911 | Specific population (e.g. cancer patients, or HBV/HCV infected patients etc.) |
| 19422477 | Specific population (e.g. cancer patients, or HBV/HCV infected patients etc.) |
| 19549812 | Specific population (e.g. cancer patients, or HBV/HCV infected patients etc.) |
| 19879061 | Specific population (e.g. cancer patients, or HBV/HCV infected patients etc.) |
| 20354525 | Specific population (e.g. cancer patients, or HBV/HCV infected patients etc.) |
| 20399781 | Specific population (e.g. cancer patients, or HBV/HCV infected patients etc.) |
| 20669224 | Specific population (e.g. cancer patients, or HBV/HCV infected patients etc.) |
| 20920698 | Specific population (e.g. cancer patients, or HBV/HCV infected patients etc.) |
| 21221244 | Specific population (e.g. cancer patients, or HBV/HCV infected patients etc.) |
| 21800292 | Specific population (e.g. cancer patients, or HBV/HCV infected patients etc.) |
| 21935276 | Specific population (e.g. cancer patients, or HBV/HCV infected patients etc.) |
| 22120574 | Specific population (e.g. cancer patients, or HBV/HCV infected patients etc.) |
| 22266734 | Specific population (e.g. cancer patients, or HBV/HCV infected patients etc.) |
| 22281433 | Specific population (e.g. cancer patients, or HBV/HCV infected patients etc.) |
| 22297866 | Specific population (e.g. cancer patients, or HBV/HCV infected patients etc.) |

| PMID/DOI | Exclusion reason                                                              |
|----------|-------------------------------------------------------------------------------|
| 22526616 | Specific population (e.g. cancer patients, or HBV/HCV infected patients etc.) |
| 22991257 | Specific population (e.g. cancer patients, or HBV/HCV infected patients etc.) |
| 23633003 | Specific population (e.g. cancer patients, or HBV/HCV infected patients etc.) |
| 27527741 | Specific population (e.g. cancer patients, or HBV/HCV infected patients etc.) |
| 29054569 | Specific population (e.g. cancer patients, or HBV/HCV infected patients etc.) |
| 9010910  | Specific population (e.g. cancer patients, or HBV/HCV infected patients etc.) |
| 27294746 | Specific population (e.g. cancer patients, or HBV/HCV infected patients etc.) |
| 29790667 | Specific population (e.g. cancer patients, or HBV/HCV infected patients etc.) |
| 12640672 | Specific population (e.g. cancer patients, or HBV/HCV infected patients etc.) |
| 9308706  | Compared to the general population (not people without diabetes)              |
| 7068798  | Compared to the general population (not people without diabetes)              |
| 29370205 | Compared to the general population (not people without diabetes)              |
| 27271648 | Compared to the general population (not people without diabetes)              |
| 26541196 | Compared to the general population (not people without diabetes)              |
| 26201803 | Compared to the general population (not people without diabetes)              |
| 26082067 | Compared to the general population (not people without diabetes)              |
| 25488912 | Compared to the general population (not people without diabetes)              |
| 25451896 | Compared to the general population (not people without diabetes)              |
| 25300498 | Compared to the general population (not people without diabetes)              |
| 23722623 | Compared to the general population (not people without diabetes)              |
| 22839452 | Compared to the general population (not people without diabetes)              |
| 21752291 | Compared to the general population (not people without diabetes)              |
| 21193459 | Compared to the general population (not people without diabetes)              |
| 19918015 | Compared to the general population (not people without diabetes)              |
| 1951827  | Compared to the general population (not people without diabetes)              |
| 1932543  | Compared to the general population (not people without diabetes)              |
| 19191082 | Compared to the general population (not people without diabetes)              |
| 1827398  | Compared to the general population (not people without diabetes)              |
| 16790032 | Compared to the general population (not people without diabetes)              |
| 15886700 | Compared to the general population (not people without diabetes)              |
| 12663571 | Compared to the general population (not people without diabetes)              |
| 11515436 | Compared to the general population (not people without diabetes)              |
| 10497622 | Compared to the general population (not people without diabetes)              |
| 10096781 | Compared to the general population (not people without diabetes)              |
| 14652242 | Irrelevant exposures                                                          |
| 15466982 | Irrelevant exposures                                                          |
| 19226331 | Irrelevant exposures                                                          |
| 20636960 | Irrelevant exposures                                                          |
| 20647401 | Irrelevant exposures                                                          |
| 23929218 | Irrelevant exposures                                                          |
| 26212724 | Irrelevant exposures                                                          |
| 8718428  | Irrelevant exposures                                                          |
| 9367058  | Irrelevant exposures                                                          |
| 22619079 | Irrelevant exposures                                                          |
| 26960926 | Irrelevant exposures                                                          |
| 30603260 | Irrelevant exposures                                                          |
| 12730869 | Irrelevant outcomes                                                           |
| 16790036 | Irrelevant outcomes                                                           |
| 19908334 | Irrelevant outcomes                                                           |
| 21325950 | Irrelevant outcomes                                                           |
| 21894459 | Irrelevant outcomes                                                           |
| 23560242 | Irrelevant outcomes                                                           |
| 23755906 | Irrelevant outcomes                                                           |
| 24091887 | Irrelevant outcomes                                                           |
| 24944487 | Irrelevant outcomes                                                           |
| 27208325 | Irrelevant outcomes                                                           |
| 6370768  | Irrelevant outcomes                                                           |
| 9794177  | Irrelevant outcomes                                                           |
| 22527209 | Irrelevant outcomes                                                           |

| PMID/DOI                        | Exclusion reason                                     |
|---------------------------------|------------------------------------------------------|
| 26011105                        | Irrelevant outcomes                                  |
| 10929764                        | No estimates (CIs, SEs or exact p-values)            |
| 17086880                        | No estimates (CIs, SEs or exact p-values)            |
| 24756959                        | No estimates (CIs, SEs or exact p-values)            |
| 4378317                         | No estimates (CIs, SEs or exact p-values)            |
| 6826689                         | No estimates (CIs, SEs or exact p-values)            |
| 8056126                         | No estimates (CIs, SEs or exact p-values)            |
| 9653609                         | No estimates (CIs, SEs or exact p-values)            |
| 10.1016/j.urology.2009.07.1106* | No estimates (CIs, SEs or exact p-values)            |
| 20880183                        | No estimates (CIs, SEs or exact p-values)            |
| 28237628                        | No estimates (CIs, SEs or exact p-values)            |
| 29784146                        | No estimates (CIs, SEs or exact p-values)            |
| 29804063                        | No estimates (CIs, SEs or exact p-values)            |
| 11600471                        | Duplicate cohorts (larger person-years was included) |
| 12181105                        | Duplicate cohorts (larger person-years was included) |
| 12397646                        | Duplicate cohorts (larger person-years was included) |
| 12420955                        | Duplicate cohorts (larger person-years was included) |
| 15191933                        | Duplicate cohorts (larger person-years was included) |
| 16541321                        | Duplicate cohorts (larger person-years was included) |
| 16721800                        | Duplicate cohorts (larger person-years was included) |
| 16968859                        | Duplicate cohorts (larger person-years was included) |
| 19664792                        | Duplicate cohorts (larger person-years was included) |
| 19723915                        | Duplicate cohorts (larger person-years was included) |
| 20479278                        | Duplicate cohorts (larger person-years was included) |
| 21398527                        | Duplicate cohorts (larger person-years was included) |
| 21544514                        | Duplicate cohorts (larger person-years was included) |
| 21820134                        | Duplicate cohorts (larger person-years was included) |
| 22124092                        | Duplicate cohorts (larger person-years was included) |
| 22158673                        | Duplicate cohorts (larger person-years was included) |
| 22525339                        | Duplicate cohorts (larger person-years was included) |
| 23110810                        | Duplicate cohorts (larger person-years was included) |
| 23658071                        | Duplicate cohorts (larger person-years was included) |
| 24069323                        | Duplicate cohorts (larger person-years was included) |
| 24884617                        | Duplicate cohorts (larger person-years was included) |
| 25014539                        | Duplicate cohorts (larger person-years was included) |
| 25978841                        | Duplicate cohorts (larger person-years was included) |
| 26559055                        | Duplicate cohorts (larger person-years was included) |
| 27189066                        | Duplicate cohorts (larger person-years was included) |
| 3372055                         | Duplicate cohorts (larger person-years was included) |
| 7666483                         | Duplicate cohorts (larger person-years was included) |
| 8841022                         | Duplicate cohorts (larger person-years was included) |
| 9139868                         | Duplicate cohorts (larger person-years was included) |
| 9150194                         | Duplicate cohorts (larger person-years was included) |
| 9486458                         | Duplicate cohorts (larger person-years was included) |
| 10088625                        | Duplicate cohorts (larger person-years was included) |
| 14762783                        | Duplicate cohorts (larger person-years was included) |
| 17401636                        | Duplicate cohorts (larger person-years was included) |
| 17450441                        | Duplicate cohorts (larger person-years was included) |
| 18618278                        | Duplicate cohorts (larger person-years was included) |
| 20578004                        | Duplicate cohorts (larger person-years was included) |
| 21273499                        | Duplicate cohorts (larger person-years was included) |
| 21415356                        | Duplicate cohorts (larger person-years was included) |
| 21602426                        | Duplicate cohorts (larger person-years was included) |
| 22719752                        | Duplicate cohorts (larger person-years was included) |
| 22895832                        | Duplicate cohorts (larger person-years was included) |
| 23053824                        | Duplicate cohorts (larger person-years was included) |
| 23648711                        | Duplicate cohorts (larger person-years was included) |
| 23826297                        | Duplicate cohorts (larger person-years was included) |
| 23943977                        | Duplicate cohorts (larger person-years was included) |

| PMID/DOI                                              | Exclusion reason                                     |
|-------------------------------------------------------|------------------------------------------------------|
| 24991802                                              | Duplicate cohorts (larger person-years was included) |
| 25058016                                              | Duplicate cohorts (larger person-years was included) |
| 25275365                                              | Duplicate cohorts (larger person-years was included) |
| 25552419                                              | Duplicate cohorts (larger person-years was included) |
| 26185535                                              | Duplicate cohorts (larger person-years was included) |
| 27368048                                              | Duplicate cohorts (larger person-years was included) |
| 28348740                                              | Duplicate cohorts (larger person-years was included) |
| 29518753                                              | Duplicate cohorts (larger person-years was included) |
| 17164367                                              | Combination of several cohorts: no CI in each cohort |
| 17696730                                              | Combination of several cohorts: no CI in each cohort |
| 20027213                                              | Combination of several cohorts: no CI in each cohort |
| 20490448                                              | Combination of several cohorts: no CI in each cohort |
| 20705912                                              | Combination of several cohorts: no CI in each cohort |
| 21366474                                              | Combination of several cohorts: no CI in each cohort |
| 21984693                                              | Combination of several cohorts: no CI in each cohort |
| 22294499                                              | Combination of several cohorts: no CI in each cohort |
| 23889822                                              | Combination of several cohorts: no CI in each cohort |
| 27493134                                              | Combination of several cohorts: no CI in each cohort |
| 27742674                                              | Combination of several cohorts: no CI in each cohort |
| 28265721                                              | Combination of several cohorts: no CI in each cohort |
| 28352981                                              | Combination of several cohorts: no CI in each cohort |
| <b>Eligible but not included in the meta-analysis</b> |                                                      |
| 29483953                                              | Less than 10 cohorts reported for the outcome        |
| 27892965                                              | Less than 10 cohorts reported for the outcome        |
| 27646740                                              | Less than 10 cohorts reported for the outcome        |
| 24425422                                              | Less than 10 cohorts reported for the outcome        |
| 23550697                                              | Less than 10 cohorts reported for the outcome        |
| 21389009                                              | Less than 10 cohorts reported for the outcome        |
| 2037851                                               | Less than 10 cohorts reported for the outcome        |
| 16839220                                              | Less than 10 cohorts reported for the outcome        |
| 15298731                                              | Less than 10 cohorts reported for the outcome        |
| 1462971                                               | Less than 10 cohorts reported for the outcome        |

**PMID:** PubMed ID, a unique record assigned by the NIH National Library of Medicine to papers progressively indexed in PubMed. **\*DOI:** digital object identifier, a unique alphanumeric string assigned to an online document such as a journal article or ebook. **CI:** confidence interval; **SE:** standard error; **HBV/HCV:** Hepatitis B and hepatitis C virus



**Table S2.** Characteristics of 151 included cohorts

| PMID/DOI | First Author, year (continent) <sup>Ref</sup>   | Cohort name                                                     | N         | I | M | Adjustment |     |   |   |   |   |
|----------|-------------------------------------------------|-----------------------------------------------------------------|-----------|---|---|------------|-----|---|---|---|---|
|          |                                                 |                                                                 |           |   |   | Age        | Sex | B | A | S | O |
| 2296978  | Levine W, 1990 (NA) <sup>1</sup>                | Chicago Heart Association Detection Project in Industry         | 20,755    | X | ✓ | ✓          | -   | ✓ | X | ✓ | ✓ |
| 2916544  | Thompson MM, 1989 (NA) <sup>2</sup>             | Lipid Research Clinics Prevalence Study                         | 1,701     | ✓ | X | ✓          | -   | ✓ | X | ✓ | ✓ |
| 3365678  | Mills PK, 1988 (NA) <sup>3</sup>                | The Adventist Health Study (AHS)                                | 34,198    | X | ✓ | ✓          | ✓   | X | X | X | X |
| 8014014  | Shibata A, 1994 (NA) <sup>4</sup>               | Leisure World, Laguna Hills, LA                                 | 13,976    | ✓ | X | ✓          | ✓   | X | X | ✓ | X |
| 8117767  | Sellers TA, 1994 (NA) <sup>5</sup>              | Iowa Women Health Study                                         | 36,603    | ✓ | X | ✓          | -   | X | X | X | X |
| 8449644  | Friedman GD, 1993 (NA) <sup>6</sup>             | Kasier permanente medical care programme                        | 3,137     | ✓ | X | ✓          | ✓   | X | X | ✓ | ✓ |
| 8629606  | Coughlin SS, 1996 (NA) <sup>7</sup>             | Multiple Risk Factor Intervention Trial (MRFIT)                 | 348,874   | X | ✓ | ✓          | -   | X | X | ✓ | ✓ |
| 8634649  | Steenland K, 1995 (NA) <sup>8</sup>             | National Health and Nutrition Survey I                          | 14,407    | ✓ | X | ✓          | -   | ✓ | ✓ | ✓ | ✓ |
| 9048836  | Cerhan JR, 1997 (NA) <sup>9</sup>               | Iowa Women Health Study                                         | 37,934    | ✓ | X | ✓          | -   | X | X | X | X |
| 9571339  | Adlerberth AM, 1997 (EU) <sup>10</sup>          | Multifactorial Primary Prevention Trial                         | 7,100     | X | ✓ | ✓          | -   | ✓ | X | ✓ | ✓ |
| 9583711  | Will JC, 1998 (NA) <sup>11</sup>                | Cancer Prevention Study I (CPS I)                               | 863,699   | ✓ | X | ✓          | ✓   | X | X | X | ✓ |
| 9585742  | Koskinen SV, 1998 (EU) <sup>12</sup>            | 1980 census of Finland                                          | 58,000    | X | ✓ | ✓          | X   | X | X | X | X |
| 10230844 | Will JC, 1999 (NA) <sup>13</sup>                | Cancer Prevention Study I (CPS I)                               | 15,065    | ✓ | X | ✓          | -   | X | X | X | X |
| 10360818 | Terry P, 1999 (EU) <sup>14</sup>                | Swedish Twin Registry                                           | 10,154    | ✓ | X | ✓          | -   | ✓ | X | X | ✓ |
| 10393723 | Schoen RE, 1999 (NA) <sup>15</sup>              | Cardiovascular Health Study                                     | 5,162     | ✓ | X | ✓          | ✓   | X | X | X | ✓ |
| 10815119 | Gapstur SM, 2000 (NA) <sup>16</sup>             | Chicago Heart Association Detection Project in Industry         | 35,658    | X | ✓ | ✓          | -   | ✓ | X | ✓ | ✓ |
| 11161410 | Nilsen TI, 2001 (EU) <sup>17</sup>              | Nord-Trondelag Health Survey                                    | 75,219    | ✓ | X | ✓          | -   | X | X | X | X |
| 11401910 | Anderson KE, 2001 (NA) <sup>18</sup>            | Iowa Women Health Study                                         | 24,664    | ✓ | X | ✓          | -   | ✓ | X | X | ✓ |
| 11747142 | Fujino Y, 2001 (Asia) <sup>19</sup>             | Fukuoka general population                                      | 7,018     | X | ✓ | ✓          | ✓   | X | ✓ | ✓ | X |
| 12115510 | Lin Y, 2002 (Asia) <sup>20</sup>                | Japan Collaborative Cohort Study for Evaluation of Cancer Risk  | 99,527    | X | ✓ | ✓          | -   | X | X | ✓ | X |
| 12146846 | Stolzenberg-Solomon RZ, 2002 (EU) <sup>21</sup> | Alpha-Tocopherol, Beta-Carotene Cancer Prevention Study         | 29,133    | ✓ | X | ✓          | -   | X | X | ✓ | ✓ |
| 12436437 | Tripathi A, 2002 (NA) <sup>22</sup>             | Iowa Women Health Study                                         | 37,459    | ✓ | X | ✓          | -   | ✓ | ✓ | ✓ | ✓ |
| 12714546 | Inoue M, 2003 (Asia) <sup>23</sup>              | Hospital-based Epidemiologic Research at Aichi Cancer Center    | 2,200     | ✓ | X | ✓          | ✓   | X | ✓ | X | ✓ |
| 12766105 | Michels KB, 2003 (NA) <sup>24</sup>             | Nurses' Health Study                                            | 116,488   | ✓ | X | ✓          | -   | ✓ | ✓ | X | ✓ |
| 12796045 | SaydahSH, 2002 (NA) <sup>25</sup>               | National Health and Nutrition Examination Survey II (NHANES II) | 3,054     | X | ✓ | ✓          | ✓   | ✓ | ✓ | ✓ | ✓ |
| 14618625 | Nicodemus KK, 2005 (NA) <sup>26</sup>           | Iowa Women Health Study                                         | 34,637    | ✓ | X | ✓          | ✓   | X | X | X | ✓ |
| 15184246 | Khaw KT, 2005 (EU) <sup>27</sup>                | EPIC-Northfolk, UK                                              | 9,605     | ✓ | ✓ | ✓          | ✓   | ✓ | X | ✓ | X |
| 15577289 | Batty GD, 2004 (EU) <sup>28</sup>               | Whitehall Study                                                 | 17,031    | X | ✓ | ✓          | -   | ✓ | X | ✓ | ✓ |
| 15632264 | Rodriguez C, 2005 (NA) <sup>29</sup>            | Cancer Prevention Study II Nutrition Cohort (CPS II Nutrition)  | 72,670    | ✓ | X | ✓          | -   | ✓ | X | X | ✓ |
| 15644546 | Jee SH, 2005 (Asia) <sup>30</sup>               | Korean Cancer Prevention Study (KCPS)                           | 1,298,385 | ✓ | ✓ | ✓          | -   | X | ✓ | ✓ | X |
| 15668486 | Limburg PJ, 2005 (NA) <sup>31</sup>             | Iowa Women Health Study                                         | 34,972    | ✓ | X | ✓          | -   | ✓ | X | X | ✓ |
| 15735193 | Hall GC, 2005 (EU) <sup>32</sup>                | GP data in the UK(GPRD)                                         | 334,120   | ✓ | X | ✓          | ✓   | X | X | ✓ | X |
| 15983343 | Larsson SC, 2005 (EU) <sup>33</sup>             | Cohort of Swedish Men (COSM)                                    | 45,550    | ✓ | X | ✓          | -   | ✓ | X | ✓ | ✓ |
| 16288300 | Larsson SC, 2005 (EU) <sup>34</sup>             | SMC & COSM                                                      | 83,053    | ✓ | X | ✓          | ✓   | ✓ | ✓ | ✓ | ✓ |
| 16418516 | Seow A, 2006 (Asia) <sup>35</sup>               | Singapore Chinese Health Study                                  | 61,321    | ✓ | X | ✓          | ✓   | ✓ | ✓ | ✓ | ✓ |
| 16557372 | Rapp K, 2006 (EU) <sup>36</sup>                 | Vorarlberg Health Monitoring and Promotion Programme (VHM&PP)   | 140,813   | ✓ | X | ✓          | -   | ✓ | X | ✓ | ✓ |
| 16729295 | Lai MS, 2006 (Asia) <sup>37</sup>               | Keelung Community-Based Integrated Screening (KCIS)             | 54,474    | ✓ | X | X          | X   | X | X | X | X |
| 16839219 | Khan M, 2006 (Asia) <sup>38</sup>               | Japan Collaborative Cohort Study for Evaluation of Cancer Risk  | 56,881    | ✓ | X | ✓          | -   | ✓ | ✓ | ✓ | X |
| 16877536 | Bowers K, 2006 (EU) <sup>39</sup>               | Alpha-Tocopherol, Beta-Carotene Cancer Prevention Study         | 29,133    | ✓ | X | ✓          | -   | X | X | ✓ | X |
| 16945591 | Gupta S, 2006 (NA) <sup>40</sup>                | Veterans Affairs (VA)                                           | 1,421,794 | ✓ | X | ✓          | ✓   | X | X | X | ✓ |

| PMID/DOI                   | First Author, year (continent) <sup>Ref</sup> | Cohort name                                                     | N         | I | M | Adjustment |     |   |   |   |   |
|----------------------------|-----------------------------------------------|-----------------------------------------------------------------|-----------|---|---|------------|-----|---|---|---|---|
|                            |                                               |                                                                 |           |   |   | Age        | Sex | B | A | S | O |
| 17000944                   | Inoue M, 2006 (Asia) <sup>41</sup>            | Japan Public Health Center-Based Prospective Study (JPHC)       | 97,771    | ✓ | X | ✓          | -   | ✓ | ✓ | ✓ | ✓ |
| 17033617                   | Velicer CM, 2007 (NA) <sup>42</sup>           | Vitamines and Lifestyle study (VITAL)                           | 35,239    | ✓ | X | ✓          | -   | X | X | X | ✓ |
| 17164361                   | Sturmer T, 2006 (NA) <sup>43</sup>            | Physicians Health Study                                         | 22,071    | ✓ | X | ✓          | -   | X | ✓ | ✓ | ✓ |
| 17301260                   | Friberg E, 2006 (EU) <sup>44</sup>            | Women living in Uppsala County of central Sweden                | 36,773    | ✓ | X | ✓          | -   | ✓ | X | X | ✓ |
| 17327321                   | Stattn P, 2007 (EU) <sup>45</sup>             | Northern Sweden Health and Disease Cohort                       | 68,786    | ✓ | X | ✓          | -   | X | X | ✓ | X |
| 17656615                   | Setiawan VW, 2007 (NA) <sup>46</sup>          | The Multiethnic Cohort                                          | 161,126   | ✓ | X | ✓          | -   | ✓ | ✓ | ✓ | ✓ |
| 17693655                   | Travier N, 2007 (AU) <sup>47</sup>            | New Zealand free HB screening                                   | 46,575    | ✓ | X | ✓          | ✓   | X | X | X | X |
| 18268068                   | Folsom AR, 2008 (NA) <sup>48</sup>            | Atherosclerosis Risk in Communities (ARIC)                      | 13,117    | ✓ | X | ✓          | ✓   | ✓ | ✓ | ✓ | ✓ |
| 18349280                   | Darbinian JA, 2008 (NA) <sup>49</sup>         | Kasier permanente medical care programme                        | 47,209    | ✓ | X | X          | -   | ✓ | X | X | ✓ |
| 18362938                   | Lindemann K, 2008 (EU) <sup>50</sup>          | HUNT, Norway                                                    | 36,761    | ✓ | X | ✓          | -   | X | ✓ | X | ✓ |
| 18443270                   | Khan AE, 2008 (EU) <sup>51</sup>              | European Prospective Investigation into Cancer and Nutrition    | 393,477   | ✓ | X | ✓          | -   | ✓ | X | ✓ | X |
| 18505690                   | Chen CL, 2008 (Asia) <sup>52</sup>            | A cancer screening program in Taiwan                            | 23,218    | ✓ | X | ✓          | ✓   | X | X | X | X |
| 18707871                   | Larsson SC, 2008 (EU) <sup>53</sup>           | Cohort of Swedish Men (COSM)                                    | 45,906    | ✓ | X | ✓          | -   | X | X | ✓ | ✓ |
| 18753735                   | Oba S, 2008 (Asia) <sup>54</sup>              | Takayama Study Cohort                                           | 29,079    | X | ✓ | ✓          | -   | ✓ | ✓ | ✓ | ✓ |
| 19058180                   | Kasper JS, 2009 (NA) <sup>55</sup>            | Health Professional Follow-up Study                             | 47,781    | ✓ | X | ✓          | -   | ✓ | X | ✓ | ✓ |
| 19165860                   | Stevens RJ, 2009 (EU) <sup>56</sup>           | Million women study                                             | 1,287,963 | ✓ | X | ✓          | -   | ✓ | X | X | ✓ |
| 19236964                   | Ikeda F, 2009 (Asia) <sup>57</sup>            | Hisayama, Kyushu Island, Fukuoka, Japan                         | 2,603     | ✓ | X | ✓          | ✓   | ✓ | ✓ | ✓ | ✓ |
| 19240222                   | Waters KM, 2009 (NA) <sup>58</sup>            | The Multiethnic Cohort                                          | 86,013    | ✓ | X | ✓          | -   | ✓ | X | X | ✓ |
| 19277881                   | Martin RM, 2009 (EU) <sup>59</sup>            | HUNT 2, Norway                                                  | 29,364    | ✓ | X | ✓          | -   | X | X | ✓ | ✓ |
| 19436298                   | Wallstrom P, 2009 (EU) <sup>60</sup>          | Malmo Diet and Cancer Cohort                                    | 10,564    | ✓ | X | ✓          | -   | ✓ | ✓ | ✓ | ✓ |
| 19444913                   | Erber E, 2009 (NA) <sup>61</sup>              | The Multiethnic Cohort                                          | 193,050   | ✓ | X | ✓          | -   | ✓ | ✓ | X | ✓ |
| 19690547                   | Ogunleye AA, 2009 (EU) <sup>62</sup>          | Datasets of the Health Informatics Centre, University of Dundee | 28,731    | ✓ | X | ✓          | ✓   | X | X | X | ✓ |
| 10.1016/j.dsx.2008.10.003* | Yood MU, 2009 (NA) <sup>63</sup>              | Claims paid by health plan and elements                         | 442,712   | ✓ | X | ✓          | ✓   | X | X | X | ✓ |
| 19808918                   | Ehrlich SF, 2010 (NA) <sup>64</sup>           | Kasier permanente medical care programme                        | 121,887   | ✓ | X | ✓          | ✓   | ✓ | ✓ | ✓ | ✓ |
| 19951937                   | Meinhold CL, 2009 (NA) <sup>65</sup>          | US Radiologic Technologists Study                               | 69,506    | ✓ | X | ✓          | -   | X | X | X | ✓ |
| 20148361                   | Chodick G, 2010 (ME) <sup>66</sup>            | Maccabi Healthcare Services registry                            | 100,595   | ✓ | X | ✓          | -   | ✓ | X | X | ✓ |
| 20228997                   | Li Q, 2010 (Asia) <sup>67</sup>               | The Ohsaki National Health Insurance (NHI) cohort               | 22,485    | ✓ | X | ✓          | -   | ✓ | X | ✓ | ✓ |
| 20383575                   | Flood A, 2010 (NA) <sup>68</sup>              | Breast Cancer Detection Demonstration project                   | 45,516    | ✓ | X | ✓          | -   | X | ✓ | ✓ | ✓ |
| 20473855                   | Atchison EA, 2010 (NA) <sup>69</sup>          | Veterans Affairs (VA)                                           | 4,501,578 | ✓ | X | ✓          | -   | ✓ | X | X | ✓ |
| 20531412                   | He J, 2010 (NA) <sup>70</sup>                 | The Multiethnic Cohort                                          | 215,251   | ✓ | X | ✓          | ✓   | ✓ | X | ✓ | ✓ |
| 20633560                   | Campbell PT, 2010 (NA) <sup>71</sup>          | Cancer Prevention Study II Nutrition Cohort (CPS II Nutrition)  | 154,975   | ✓ | X | ✓          | -   | ✓ | ✓ | X | ✓ |
| 21116605-1                 | Wotton CJ, 2011 (EU) <sup>72</sup>            | Oxford Linkage Study 1                                          | 291,462   | ✓ | X | ✓          | -   | X | X | X | ✓ |
| 21116605-2                 | Wotton CJ, 2011 (EU) <sup>72</sup>            | Oxford Linkage Study 2                                          | 192,894   | ✓ | X | ✓          | -   | X | X | X | ✓ |
| 21470936                   | Woolcott CG, 2011 (NA) <sup>73</sup>          | The Multiethnic Cohort                                          | 185,816   | ✓ | X | X          | -   | X | ✓ | X | ✓ |
| 21688131                   | Lambe M, 2011 (EU) <sup>74</sup>              | Apolipoprotein Mortality Related Risk (AMORIS)                  | 201,737   | ✓ | X | ✓          | -   | ✓ | X | X | ✓ |
| 21748485                   | Johnson JA, 2010 (NA) <sup>75</sup>           | British Columbia Linked Health Databases (BCLHD)                | 370,200   | ✓ | X | ✓          | ✓   | X | X | X | ✓ |
| 21767143                   | Aschebrook- Kilfoy B, 2011 (NA) <sup>76</sup> | NIH-AARP diet and health study                                  | 496,548   | ✓ | X | ✓          | ✓   | ✓ | X | ✓ | ✓ |
| 21953276                   | Grote VA, 2011 (EU) <sup>77</sup>             | European Prospective Investigation into Cancer and Nutrition    | 932       | ✓ | X | X          | X   | ✓ | X | ✓ | X |
| 22100961                   | Yeh HC, 2012 (NA) <sup>78</sup>               | Give Us a Clue to Cancer and Heart Disease (CLUE II)            | 18,240    | ✓ | ✓ | ✓          | ✓   | ✓ | X | ✓ | ✓ |
| 22467266                   | Attner B, 2012 (EU) <sup>79</sup>             | Population of Scania (Southern Sweden)                          | 167,080   | ✓ | X | ✓          | ✓   | ✓ | X | X | ✓ |

| PMID/DOI   | First Author, year (continent) <sup>Ref</sup> | Cohort name                                                    | N         | I | M | Adjustment |     |   |   |   |   |
|------------|-----------------------------------------------|----------------------------------------------------------------|-----------|---|---|------------|-----|---|---|---|---|
|            |                                               |                                                                |           |   |   | Age        | Sex | B | A | S | O |
| 22510866   | Lo SF, 2012 (Asia) <sup>80</sup>              | Taiwan NHI program                                             | 1,790,868 | ✓ | X | ✓          | ✓   | X | X | X | ✓ |
| 22619084   | Luo J, 2012 (NA) <sup>81</sup>                | Women's Health Initiative                                      | 145,765   | ✓ | X | ✓          | -   | ✓ | ✓ | ✓ | ✓ |
| 22622863   | Luo J, 2013 (NA) <sup>82</sup>                | Women's Health Initiative                                      | 145,765   | ✓ | X | ✓          | -   | ✓ | ✓ | ✓ | ✓ |
| 22699290   | Campell PT, 2012 (NA) <sup>83</sup>           | Cancer Prevention Study II (CPS II)                            | 1,053,831 | X | ✓ | ✓          | -   | ✓ | ✓ | ✓ | ✓ |
| 22941335   | Gapstur SM, 2012 (NA) <sup>84</sup>           | Cancer Prevention Study II Nutrition Cohort (CPS II Nutrition) | 63,440    | ✓ | X | ✓          | -   | ✓ | X | X | ✓ |
| 23024033   | Newton CC, 2013 (NA) <sup>85</sup>            | Cancer Prevention Study II Nutrition Cohort (CPS II Nutrition) | 172,791   | ✓ | X | ✓          | ✓   | ✓ | ✓ | ✓ | ✓ |
| 23296458   | Prizment AE, 2013 (NA) <sup>86</sup>          | Iowa Women Health Study                                        | 37,327    | ✓ | X | ✓          | -   | ✓ | ✓ | ✓ | ✓ |
| 23370206   | Koh WP, 2013 (Asia) <sup>87</sup>             | Singapore Chinese Health Study                                 | 61,321    | ✓ | X | ✓          | ✓   | ✓ | ✓ | ✓ | ✓ |
| 23406734-1 | Yang WS, 2013 (Asia) <sup>88</sup>            | Shanghai Women's Health study                                  | 73,105    | ✓ | X | ✓          | -   | ✓ | ✓ | ✓ | ✓ |
| 23406734-2 | Yang WS, 2013 (Asia) <sup>88</sup>            | Shanghai Men's Health study                                    | 60,183    | ✓ | X | ✓          | -   | ✓ | ✓ | ✓ | ✓ |
| 23408570   | Lai GY, 2013 (NA) <sup>89</sup>               | NIH-AARP diet and health study                                 | 494,867   | ✓ | X | ✓          | ✓   | ✓ | ✓ | ✓ | ✓ |
| 23571511   | Onitilo AA, 2014 (NA) <sup>90</sup>           | Marshfield Clinic                                              | 31,769    | ✓ | X | ✓          | ✓   | ✓ | X | ✓ | ✓ |
| 23618197   | Sikdar KC, 2013 (NA) <sup>91</sup>            | Cancer and Chronic Disease Research Database (CCDRD) in NL     | 122,228   | ✓ | X | ✓          | -   | X | X | X | ✓ |
| 23661106   | Walker JJ, 2013 (EU) <sup>92</sup>            | Scottish Care Information –Diabetes Collaboration              | 80,838    | ✓ | X | ✓          | -   | X | X | X | ✓ |
| 23669472   | Henry SA, 2014 (NA) <sup>93</sup>             | Iowa Women Health Study                                        | 36,084    | ✓ | X | ✓          | -   | ✓ | X | ✓ | X |
| 23720454   | Schlesinger S, 2013 (EU) <sup>94</sup>        | European Prospective Investigation into Cancer and Nutrition   | 363,426   | ✓ | X | ✓          | ✓   | ✓ | ✓ | ✓ | ✓ |
| 23859808   | Nakamura K, 2013 (Asia) <sup>95</sup>         | Takayama Study Cohort                                          | 30,720    | ✓ | X | ✓          | -   | ✓ | ✓ | ✓ | ✓ |
| 23990517   | Colmers IN, 2013 (NA) <sup>96</sup>           | British Columbia Linked Health Databases (BCLHD)               | 370,200   | ✓ | X | ✓          | ✓   | X | X | X | ✓ |
| 24045960   | Ma Y, 2013 (NA) <sup>97</sup>                 | Women's Health Initiative                                      | 158,833   | X | ✓ | ✓          | -   | ✓ | X | ✓ | ✓ |
| 24149173   | Eijgenraam P, 2013 (EU) <sup>98</sup>         | NLCS, the Netherlands Cohort Study                             | 4,438     | ✓ | X | ✓          | ✓   | ✓ | ✓ | ✓ | ✓ |
| 24704132   | Shen C, 2014 (Asia) <sup>99</sup>             | Elderly health centres in Hong Kong                            | 66,813    | X | ✓ | ✓          | ✓   | ✓ | ✓ | ✓ | ✓ |
| 24862312   | Tsilidis KK, 2015 (EU) <sup>100</sup>         | European Prospective Investigation into Cancer and Nutrition   | 139,131   | ✓ | X | ✓          | -   | ✓ | X | ✓ | ✓ |
| 24934410   | Sekikawa A, 2014 (Asia) <sup>101</sup>        | Osaka Red Cross Hospital                                       | 1,449     | ✓ | X | ✓          | ✓   | X | X | X | ✓ |
| 24993754-1 | Yang WS, 2014 (Asia) <sup>102</sup>           | Shanghai Men's Health Study                                    | 59,910    | ✓ | X | ✓          | -   | ✓ | ✓ | ✓ | ✓ |
| 24993754-2 | Yang WS, 2014 (Asia) <sup>102</sup>           | Shanghai Women's Health study                                  | 73,114    | ✓ | X | ✓          | -   | ✓ | ✓ | ✓ | ✓ |
| 25047425   | De Bruijn KMJ, 2014 (EU) <sup>103</sup>       | Rotterdam Study                                                | 10,181    | ✓ | X | ✓          | ✓   | ✓ | ✓ | ✓ | ✓ |
| 25051408   | Luo J, 2014 (NA) <sup>104</sup>               | Women's Health Initiative                                      | 88,107    | ✓ | X | ✓          | -   | ✓ | ✓ | ✓ | ✓ |
| 25104237   | Gordon_Dseagu VLZ, 2014 (EU) <sup>105</sup>   | HSE and SHeS                                                   | 204,533   | X | ✓ | ✓          | ✓   | ✓ | X | ✓ | ✓ |
| 25326644   | Setiawan VW, 2014 (NA) <sup>106</sup>         | The Multiethnic Cohort                                         | 168,679   | ✓ | X | X          | ✓   | ✓ | ✓ | ✓ | ✓ |
| 25557005-1 | Xu HL, 2015 (Asia) <sup>107</sup>             | Shanghai Men's Health Study                                    | 61,283    | ✓ | X | ✓          | ✓   | ✓ | ✓ | ✓ | ✓ |
| 25557005-2 | Xu HL, 2015 (Asia) <sup>107</sup>             | Shanghai Women's Health Study                                  | 73,042    | ✓ | X | ✓          | ✓   | ✓ | ✓ | ✓ | ✓ |
| 25604005   | Liu X, 2015 (EU) <sup>108</sup>               | Swedish Register database                                      | 380,196   | ✓ | X | ✓          | ✓   | X | X | X | ✓ |
| 26033947   | Goossens ME, 2015 (EU) <sup>109</sup>         | GP data in the UK(CPRD)                                        | 408,588   | ✓ | X | ✓          | ✓   | ✓ | X | ✓ | X |
| 26250516   | Best LG, 2015 (NA) <sup>110</sup>             | Strong Heart Study                                             | 4,419     | X | ✓ | ✓          | ✓   | ✓ | ✓ | ✓ | ✓ |
| 26275864   | Valent F, 2015 (EU) <sup>111</sup>            | Friuli Venezia Giulia region                                   | 1,196,243 | ✓ | X | ✓          | -   | X | X | X | X |
| 26575601   | Lu Y, 2015 (EU) <sup>112</sup>                | GP data in the UK(THIN)                                        | 5,529     | ✓ | X | ✓          | ✓   | ✓ | ✓ | ✓ | ✓ |
| 26760177   | Luo J, 2016 (NA) <sup>113</sup>               | Women's Health Initiative                                      | 147,934   | ✓ | X | ✓          | -   | ✓ | ✓ | ✓ | ✓ |
| 26851751   | Gini A, 2016 (EU) <sup>114</sup>              | Friuli Venezia Giulia region                                   | 1,050,765 | ✓ | X | ✓          | -   | X | X | X | X |
| 27097356   | De Kort S, 2016 (EU) <sup>115</sup>           | NLCS, the Netherlands Cohort Study                             | 3,919     | ✓ | X | ✓          | -   | ✓ | ✓ | ✓ | ✓ |
| 27148890   | Petrick JL, 2016 (NA) <sup>116</sup>          | Kasier permanente medical care programme                       | 4,935     | ✓ | X | ✓          | ✓   | X | ✓ | ✓ | ✓ |
| 27257115   | Dankner R, 2016 (ME) <sup>117</sup>           | Clalit Health Service health records                           | 1,152,122 | ✓ | X | ✓          | -   | X | X | ✓ | ✓ |



| PMID/DOI   | First Author, year (continent) <sup>Ref</sup> | Cohort name                                               | N         | I | M | Adjustment |     |   |   |   |   |
|------------|-----------------------------------------------|-----------------------------------------------------------|-----------|---|---|------------|-----|---|---|---|---|
|            |                                               |                                                           |           |   |   | Age        | Sex | B | A | S | O |
| 27400035   | Lega IC, 2016 (NA) <sup>118</sup>             | Ontario healthcare database                               | 1,032,438 | ✓ | X | X          | X   | X | X | X | ✓ |
| 27770555   | Haagstrom C, 2005 (EU) <sup>119</sup>         | Prostate Cancer data Base Sweden (PCBaSe)                 | 612,846   | ✓ | X | X          | -   | X | X | X | ✓ |
| 27877221   | Choi JB, 2016 (Asia) <sup>120</sup>           | Korean National Insurance database                        | 139,519   | ✓ | X | ✓          | -   | X | ✓ | ✓ | ✓ |
| 28063165   | Pang Y, 2017 (Asia) <sup>121</sup>            | China Kadoorie Biobank                                    | 510,314   | ✓ | ✓ | ✓          | ✓   | X | ✓ | ✓ | ✓ |
| 28087607   | Maskarinec G, 2017 (NA) <sup>122</sup>        | The Multiethnic Cohort                                    | 103,721   | ✓ | X | ✓          | -   | ✓ | ✓ | X | ✓ |
| 28109969   | Kasmari AJ, 2017 (NA) <sup>123</sup>          | MarketScan Commercial Claims and Encounters Database      | 29,583    | ✓ | X | X          | X   | X | X | X | ✓ |
| 28114552   | Bragg F, 2017 (Asia) <sup>124</sup>           | China Kadoorie Biobank                                    | 512,797   | X | ✓ | ✓          | ✓   | ✓ | ✓ | ✓ | ✓ |
| 28190111   | Yang WS, 2017 (Asia) <sup>125</sup>           | Taiwan Chin-Shan township                                 | 3,561     | ✓ | X | ✓          | ✓   | ✓ | ✓ | ✓ | ✓ |
| 28436468   | De Kort S, 2017 (EU) <sup>126</sup>           | PHARMO Database Network                                   | 325,054   | ✓ | X | ✓          | ✓   | X | X | X | ✓ |
| 28463757   | De Jong RGPJ, 2017 (EU) <sup>127</sup>        | PHARMO Database Network                                   | 68,076    | ✓ | X | ✓          | ✓   | X | X | X | ✓ |
| 28593629   | Drake I, 2017 (EU) <sup>128</sup>             | Malmo Diet and Cancer Cohort                              | 26,953    | ✓ | ✓ | ✓          | ✓   | X | ✓ | ✓ | ✓ |
| 28640432   | Tsujimoto T, 2017 (NA) <sup>129</sup>         | National Health and Nutrition Examination Survey (NHANES) | 13,000    | X | ✓ | ✓          | ✓   | ✓ | X | ✓ | ✓ |
| 29070034   | Ballotari P, 2017 (EU) <sup>130</sup>         | Diabetes registry Reggio Emilia province (Northern Italy) | 407,157   | ✓ | X | ✓          | ✓   | X | X | X | X |
| 29078006   | Chen CB, 2018 (NA) <sup>131</sup>             | British Columbia Linked Health Databases (BCLHD)          | 160,566   | ✓ | X | X          | -   | X | X | X | ✓ |
| 29141994   | Palmer JR, 2017 (NA) <sup>132</sup>           | Black Women's Health Study (BWHS)                         | 54,337    | ✓ | X | ✓          | -   | ✓ | X | X | ✓ |
| 29152763-1 | Simon TG, 2018 (NA) <sup>133</sup>            | Nurses' Health study                                      | 120,826   | ✓ | X | ✓          | -   | ✓ | ✓ | ✓ | ✓ |
| 29152763-2 | Simon TG, 2018 (NA) <sup>133</sup>            | Health Professional Follow-up Study                       | 50,284    | ✓ | X | ✓          | -   | ✓ | ✓ | ✓ | ✓ |
| 29278016   | He X, 2018 (Asia) <sup>134</sup>              | Tianjin Urban Employee Basic Medical Insurance database   | 793,795   | ✓ | X | ✓          | ✓   | X | X | X | ✓ |
| 29304221   | Pan XF, 2018 (Asia) <sup>135</sup>            | China Kadoorie Biobank                                    | 508,892   | ✓ | X | ✓          | ✓   | ✓ | ✓ | ✓ | ✓ |
| 29566433   | Bao C, 2018 (EU) <sup>136</sup>               | Swedish Twin Registry                                     | 25,154    | ✓ | X | ✓          | -   | ✓ | ✓ | ✓ | ✓ |
| 29582412   | Li M, 2018 (AU) <sup>137</sup>                | Well Person's Health Check in North Queensland            | 2,273     | ✓ | X | ✓          | ✓   | X | X | X | ✓ |
| 29678810-1 | Graff RE, 2018 (NA) <sup>138</sup>            | Health Professional Follow-up Study                       | 46,380    | ✓ | X | ✓          | -   | ✓ | ✓ | ✓ | ✓ |
| 29678810-2 | Graff RE, 2018 (NA) <sup>138</sup>            | Nurses' Health Study                                      | 111,244   | ✓ | X | ✓          | -   | ✓ | ✓ | ✓ | ✓ |
| 29705628   | De Jong RGPJ, 2018 (EU) <sup>139</sup>        | GP data in the UK (CPRD)                                  | 666,879   | ✓ | X | ✓          | -   | X | X | X | ✓ |
| 29734463   | Pang Y, 2018 (Asia) <sup>140</sup>            | China Kadoorie Biobank                                    | 503,993   | ✓ | X | ✓          | ✓   | ✓ | ✓ | ✓ | ✓ |
| 29946194   | Lee DY, 2018 (Asia) <sup>141</sup>            | Korean National Insurance database                        | 5,027,045 | ✓ | X | ✓          | ✓   | X | ✓ | X | ✓ |
| 29970599   | Pang Y, 2018 (Asia) <sup>142</sup>            | China Kadoorie Biobank                                    | 510,136   | ✓ | X | ✓          | ✓   | ✓ | ✓ | ✓ | ✓ |
| 30094676   | Miller EA, 2018 (NA) <sup>143</sup>           | PLCO Screening Trial                                      | 73,349    | ✓ | X | ✓          | -   | X | X | X | X |
| 30401889-1 | Ma Y, 2018 (NA) <sup>144</sup>                | Health Professional Follow-up Study                       | 47,240    | ✓ | X | ✓          | ✓   | ✓ | ✓ | ✓ | ✓ |
| 30401889-2 | Ma Y, 2018 (NA) <sup>144</sup>                | Nurses' Health study                                      | 87,523    | ✓ | X | ✓          | ✓   | ✓ | ✓ | ✓ | ✓ |

Studies are sorted by **PMID** (PubMed ID – unique record assigned by the NIH National Library of Medicine to papers progressively indexed in PubMed). \***DOI**: digital object identifier, a unique alphanumeric string assigned to an online document such as a journal article or ebook.

**I**: Incidence; **M**: Mortality; **A**: Alcohol; **B**: Body Mass Index; **S**: Smoking; **O**: Others

Continent: **NA**: North America; **EU**: Europe; **ME**: Middle East.

✓: Yes; X: No; -: Not Applicable

**Table S3.** Meta-analyses of all-site and site-specific cancer incidence and mortality: main analysis vs. restricted analysis

| Outcome   | Cancer      | Analysis   | No. of cohorts | Total events | Total participants | Pooled RR         | I <sup>2</sup> | I <sup>2</sup> p-value |
|-----------|-------------|------------|----------------|--------------|--------------------|-------------------|----------------|------------------------|
| Incidence | All         | Main       | 30             | 816,630      | 15,498,790         | 1.15 (1.10, 1.21) | 98.8%          | <0.001                 |
| Incidence | All         | Restricted | 21             | 385,887      | 8,237,333          | 1.14 (1.08, 1.20) | 96.9%          | <0.001                 |
| Incidence | Bladder     | Main       | 30             | 43,092       | 15,869,950         | 1.19 (1.09, 1.29) | 87.0%          | <0.001                 |
| Incidence | Bladder     | Restricted | 20             | 19,370       | 7,798,242          | 1.15 (1.05, 1.25) | 70.3%          | <0.001                 |
| Incidence | Breast      | Main       | 32             | 55,858       | 8,361,221          | 1.10 (1.05, 1.15) | 66.5%          | <0.001                 |
| Incidence | Breast      | Restricted | 23             | 48,184       | 5,752,299          | 1.10 (1.03, 1.17) | 68.4%          | <0.001                 |
| Incidence | Colon       | Main       | 24             | 48,923       | 9,128,887          | 1.30 (1.22, 1.39) | 83.7%          | <0.001                 |
| Incidence | Colon       | Restricted | 20             | 22,006       | 3,851,612          | 1.29 (1.19, 1.40) | 74.4%          | <0.001                 |
| Incidence | Colorectal  | Main       | 47             | 104,351      | 18,416,872         | 1.29 (1.23, 1.36) | 88.6%          | <0.001                 |
| Incidence | Colorectal  | Restricted | 36             | 64,580       | 1,1025,422         | 1.27 (1.21, 1.34) | 83.4%          | <0.001                 |
| Incidence | Endometrium | Main       | 15             | 6,260        | 3,147,440          | 1.63 (1.41, 1.88) | 76.2%          | <0.001                 |
| Incidence | Endometrium | Restricted | 8              | 4,985        | 1,647,205          | 1.50 (1.17, 1.94) | 76.4%          | 0.001                  |
| Incidence | Esophagus   | Main       | 19             | 18,497       | 12,140,419         | 1.01 (0.89, 1.15) | 82.8%          | <0.001                 |
| Incidence | Esophagus   | Restricted | 13             | 7,502        | 6,315,453          | 0.96 (0.84, 1.10) | 63.8%          | 0.004                  |
| Incidence | Gallbladder | Main       | 17             | 4,404        | 12,738,195         | 1.61 (1.34, 1.93) | 73.4%          | <0.001                 |
| Incidence | Gallbladder | Restricted | 12             | 2,489        | 6,632,411          | 1.57 (1.23, 2.01) | 77.9%          | <0.001                 |
| Incidence | Kidney      | Main       | 23             | 18,722       | 13,169,811         | 1.32 (1.21, 1.44) | 74.7%          | <0.001                 |
| Incidence | Kidney      | Restricted | 16             | 8,503        | 5,954,999          | 1.30 (1.17, 1.43) | 55.5%          | 0.003                  |
| Incidence | Leukemia    | Main       | 12             | 15,774       | 11,441,697         | 1.19 (1.07, 1.31) | 69.4%          | 0.001                  |
| Incidence | Leukemia    | Restricted | 9              | 5,066        | 5,509,158          | 1.21 (1.03, 1.42) | 66.3%          | <0.001                 |
| Incidence | Liver       | Main       | 36             | 41,464       | 16,760,921         | 2.23 (1.99, 2.49) | 94.8%          | <0.001                 |
| Incidence | Liver       | Restricted | 25             | 25,539       | 9,664,922          | 2.27 (1.97, 2.62) | 92.8%          | <0.001                 |
| Incidence | Lung        | Main       | 32             | 154,787      | 16,149,760         | 1.05 (0.99, 1.12) | 92.0%          | <0.001                 |
| Incidence | Lung        | Restricted | 23             | 45,792       | 8,520,764          | 1.04 (0.97, 1.11) | 81.2%          | <0.001                 |
| Incidence | Melanoma    | Main       | 11             | 7,994        | 8,816,261          | 1.06 (0.95, 1.19) | 43.0%          | 0.083                  |
| Incidence | Melanoma    | Restricted | 5              | 2,856        | 2,316,188          | 0.95 (0.84, 1.09) | 0%             | 0.769                  |
| Incidence | NHL         | Main       | 19             | 19,637       | 12,554,832         | 1.12 (1.02, 1.24) | 74.8%          | <0.001                 |
| Incidence | NHL         | Restricted | 12             | 8,571        | 5,340,020          | 1.19 (1.01, 1.41) | 72.7%          | <0.001                 |
| Incidence | Ovary       | Main       | 20             | 4,768        | 7,037,739          | 1.14 (1.03, 1.26) | 51.3%          | 0.011                  |
| Incidence | Ovary       | Restricted | 14             | 3,902        | 4,629,317          | 1.14 (0.98, 1.33) | 63.3%          | 0.003                  |
| Incidence | Pancreas    | Main       | 38             | 32,713       | 23,595,620         | 2.09 (1.88, 2.33) | 93.8%          | <0.001                 |
| Incidence | Pancreas    | Restricted | 25             | 10,048       | 10,545,118         | 1.93 (1.70, 2.19) | 87.2%          | <0.001                 |
| Incidence | Prostate    | Main       | 39             | 187,279      | 13,982,425         | 0.83 (0.79, 0.88) | 91.3%          | <0.001                 |
| Incidence | Prostate    | Restricted | 28             | 113,930      | 6,912,226          | 0.81 (0.75, 0.87) | 91.4%          | <0.001                 |
| Incidence | Rectum      | Main       | 24             | 25,448       | 9,106,528          | 1.23 (1.13, 1.35) | 70.8%          | <0.001                 |
| Incidence | Rectum      | Restricted | 20             | 10,837       | 3,829,253          | 1.29 (1.17, 1.42) | 48.8%          | 0.004                  |
| Incidence | Stomach     | Main       | 28             | 22,172       | 14,443,780         | 1.19 (1.05, 1.35) | 92.9%          | <0.001                 |
| Incidence | Stomach     | Restricted | 20             | 12,410       | 8,167,673          | 1.24 (1.05, 1.45) | 92.5%          | <0.001                 |
| Incidence | Thyroid     | Main       | 14             | 5,316        | 12,942,538         | 1.20 (1.12, 1.29) | 28.3%          | 0.336                  |
| Incidence | Thyroid     | Restricted | 8              | 2,618        | 5,467,095          | 1.16 (1.07, 1.26) | 27.0%          | 0.498                  |
| Mortality | All         | Main       | 17             | 147,480      | 3,500,363          | 1.25 (1.18, 1.33) | 80.4%          | <0.001                 |
| Mortality | All         | Restricted | 14             | 145,643      | 3,426,686          | 1.26 (1.17, 1.35) | 82.6%          | <0.001                 |
| Mortality | Pancreas    | Main       | 11             | 5,082        | 3,487,609          | 1.67 (1.30, 2.14) | 65.3%          | 0.002                  |
| Mortality | Pancreas    | Restricted | 10             | 4,256        | 3,138,735          | 1.72 (1.39, 2.12) | 55.0%          | 0.008                  |

**NHL:** Non-Hodgkin Lymphoma.

**Restricted:** Meta-analyses restricted to the 120 cohorts with adequate outcome assessment and follow-up

**Table S4.** Meta-analyses of all-site and site-specific cancer incidence and mortality in females and males: main analysis vs. restricted analysis

| Outcome   | Cancer      | Sex | Analysis   | No. of Cohorts | Total events | Total participants | Pooled RR         | <i>I</i> <sup>2</sup> | <i>I</i> <sup>2</sup> p-value |
|-----------|-------------|-----|------------|----------------|--------------|--------------------|-------------------|-----------------------|-------------------------------|
| Incidence | All         | F   | Main       | 17             | 47,449       | 3,478,491          | 1.20 (1.11, 1.29) | 89.8%                 | <0.001                        |
| Incidence | All         | F   | Restricted | 14             | 39,432       | 2,184,935          | 1.17 (1.07, 1.29) | 90.7%                 | <0.001                        |
| Incidence | All         | M   | Main       | 18             | 454,124      | 8,187,414          | 1.11 (1.04, 1.19) | 97.1%                 | <0.001                        |
| Incidence | All         | M   | Restricted | 14             | 72,655       | 2,389,867          | 1.11 (1.03, 1.21) | 93.9%                 | <0.001                        |
| Incidence | Bladder     | F   | Main       | 13             | 1,698        | 3,145,115          | 1.28 (1.11, 1.48) | 32.9%                 | 0.146                         |
| Incidence | Bladder     | F   | Restricted | 10             | 1,532        | 1,851,559          | 1.26 (1.05, 1.50) | 35.7%                 | 0.159                         |
| Incidence | Bladder     | M   | Main       | 16             | 25,797       | 8,453,856          | 1.18 (1.10, 1.26) | 64.9%                 | <0.001                        |
| Incidence | Bladder     | M   | Restricted | 12             | 5,791        | 2,656,309          | 1.18 (1.12, 1.25) | 20.8%                 | 0.584                         |
| Incidence | Colon       | F   | Main       | 14             | 7,218        | 1,484,209          | 1.30 (1.16, 1.46) | 51.0%                 | 0.023                         |
| Incidence | Colon       | F   | Restricted | 13             | 6,513        | 1,288,032          | 1.28 (1.13, 1.44) | 47.5%                 | 0.044                         |
| Incidence | Colon       | M   | Main       | 13             | 30,143       | 5,724,648          | 1.21 (1.16, 1.25) | 0%                    | 0.272                         |
| Incidence | Colon       | M   | Restricted | 11             | 7,010        | 1,052,477          | 1.22 (1.13, 1.32) | 20.2%                 | 0.324                         |
| Incidence | Colorectal  | F   | Main       | 28             | 20,214       | 4,848,935          | 1.30 (1.23, 1.36) | 39.5%                 | 0.035                         |
| Incidence | Colorectal  | F   | Restricted | 23             | 18,277       | 3,357,081          | 1.29 (1.22, 1.38) | 44.5%                 | 0.017                         |
| Incidence | Colorectal  | M   | Main       | 29             | 51,025       | 8,913,761          | 1.26 (1.20, 1.32) | 53.9%                 | <0.001                        |
| Incidence | Colorectal  | M   | Restricted | 23             | 14,040       | 2,944,005          | 1.25 (1.18, 1.33) | 45.2%                 | 0.001                         |
| Incidence | Gallbladder | F   | Main       | 11             | 499          | 2,746,132          | 1.68 (1.18, 2.39) | 35.0%                 | 0.090                         |
| Incidence | Gallbladder | F   | Restricted | 8              | 438          | 1,455,778          | 1.53 (0.91, 2.57) | 53.3%                 | 0.051                         |
| Incidence | Gallbladder | M   | Main       | 12             | 1,979        | 7,906,859          | 1.49 (1.24, 1.80) | 43.3%                 | 0.121                         |
| Incidence | Gallbladder | M   | Restricted | 8              | 371          | 2,118,872          | 1.47 (1.09, 1.99) | 50.0%                 | 0.037                         |
| Incidence | Kidney      | F   | Main       | 12             | 1,431        | 2,777,233          | 1.56 (1.40, 1.75) | 25.7%                 | 0.523                         |
| Incidence | Kidney      | F   | Restricted | 9              | 1,275        | 1,483,677          | 1.50 (1.29, 1.75) | 35.6%                 | 0.311                         |
| Incidence | Kidney      | M   | Main       | 14             | 10,860       | 7,984,350          | 1.23 (1.11, 1.36) | 53.8%                 | 0.002                         |
| Incidence | Kidney      | M   | Restricted | 10             | 2,290        | 2,186,803          | 1.25 (1.07, 1.46) | 40.3%                 | 0.079                         |
| Incidence | Liver       | F   | Main       | 16             | 781          | 3,705,321          | 2.17 (1.71, 2.75) | 76.0%                 | <0.001                        |
| Incidence | Liver       | F   | Restricted | 13             | 675          | 2,411,765          | 2.08 (1.55, 2.80) | 79.1%                 | <0.001                        |
| Incidence | Liver       | M   | Main       | 17             | 6,732        | 8,261,415          | 2.26 (1.94, 2.62) | 84.0%                 | <0.001                        |
| Incidence | Liver       | M   | Restricted | 13             | 1,260        | 2,463,868          | 2.13 (1.79, 2.53) | 72.0%                 | <0.001                        |
| Incidence | Lung        | F   | Main       | 13             | 7,803        | 2,259,380          | 1.09 (0.97, 1.21) | 41.8%                 | 0.017                         |
| Incidence | Lung        | F   | Restricted | 11             | 7,095        | 2,016,589          | 1.10 (0.95, 1.27) | 44.5%                 | 0.010                         |
| Incidence | Lung        | M   | Main       | 14             | 111,859      | 6,939,273          | 1.03 (0.90, 1.17) | 90.6%                 | <0.001                        |
| Incidence | Lung        | M   | Restricted | 11             | 8,573        | 2,192,491          | 1.10 (0.96, 1.26) | 71.4%                 | <0.001                        |
| Incidence | Pancreas    | F   | Main       | 17             | 6,743        | 6,856,264          | 2.06 (1.68, 2.53) | 87.7%                 | <0.001                        |
| Incidence | Pancreas    | F   | Restricted | 12             | 2,938        | 3,331,493          | 1.70 (1.41, 2.06) | 69.8%                 | <0.001                        |
| Incidence | Pancreas    | M   | Main       | 17             | 17,355       | 12,233,146         | 2.04 (1.70, 2.43) | 91.2%                 | <0.001                        |
| Incidence | Pancreas    | M   | Restricted | 10             | 1,594        | 2,231,058          | 1.87 (1.45, 2.41) | 77.9%                 | <0.001                        |
| Incidence | Rectum      | F   | Main       | 15             | 2,427        | 1,486,238          | 1.27 (1.10, 1.47) | 25.0%                 | 0.230                         |
| Incidence | Rectum      | F   | Restricted | 14             | 2,187        | 1,290,061          | 1.31 (1.15, 1.49) | 15.5%                 | 0.438                         |
| Incidence | Rectum      | M   | Main       | 14             | 16,331       | 5,726,538          | 1.15 (1.08, 1.23) | 4.9%                  | 0.301                         |
| Incidence | Rectum      | M   | Restricted | 12             | 3,432        | 1,054,367          | 1.20 (1.08, 1.34) | 0%                    | 0.281                         |
| Incidence | Stomach     | F   | Main       | 13             | 1,600        | 2,273,616          | 1.29 (1.03, 1.61) | 71.5%                 | <0.001                        |
| Incidence | Stomach     | F   | Restricted | 10             | 1,418        | 1,997,435          | 1.28 (0.94, 1.75) | 81.1%                 | <0.001                        |
| Incidence | Stomach     | M   | Main       | 14             | 10,659       | 6,965,600          | 1.07 (0.92, 1.24) | 85.1%                 | <0.001                        |
| Incidence | Stomach     | M   | Restricted | 10             | 2,776        | 2,184,132          | 1.12 (0.91, 1.38) | 83.5%                 | <0.001                        |
| Mortality | All         | F   | Main       | 11             | 63,260       | 2,063,006          | 1.28 (1.18, 1.40) | 77.0%                 | <0.001                        |
| Mortality | All         | F   | Restricted | 10             | 62,527       | 2,029,006          | 1.26 (1.15, 1.39) | 73.6%                 | <0.001                        |
| Mortality | All         | M   | Main       | 12             | 74,943       | 2,129,614          | 1.21 (1.13, 1.30) | 74.6%                 | <0.001                        |
| Mortality | All         | M   | Restricted | 11             | 74,255       | 2,105,614          | 1.21 (1.12, 1.31) | 76.7%                 | <0.001                        |

F: female; M: male

**Restricted:** Meta-analyses restricted to the 120 cohorts with adequate outcome assessment and follow-up

**Table S5.** Proportions of studies with an unconfounded association of type 2 diabetes with cancer: main analysis vs. restricted analysis

| Outcome   | Cancer      | Analysis   | Proportion (95% CI) [%]         |                                 |
|-----------|-------------|------------|---------------------------------|---------------------------------|
|           |             |            | Pre-specified relative risk 10% | Pre-specified relative risk 30% |
| Incidence | Bladder     | Main       | 39.2 (19.8, 58.5)               | 9.9 (0, 22.1)                   |
| Incidence | Bladder     | Restricted | 25.1 (0, 51.1)                  | 1.6 (0, 7.6)                    |
| Incidence | Breast      | Main       | 7.5 (0, 20.3)                   | 0 (0, 0.3)                      |
| Incidence | Breast      | Restricted | 11.6 (0, 29.2)                  | 0.2 (0, 1.5)                    |
| Incidence | Colon       | Main       | 64.3 (45.0, 83.5)               | 18.4 (1.4, 35.4)                |
| Incidence | Colon       | Restricted | 60.5 (39.5, 81.5)               | 19.2 (0.3, 38.1)                |
| Incidence | Colorectal  | Main       | 62.4 (47.9, 76.8)               | 16.8 (4.8, 28.8)                |
| Incidence | Colorectal  | Restricted | 58.0 (42.2, 73.8)               | 12.6 (0.4, 24.8)                |
| Incidence | Endometrium | Main       | 93.6 (78.2, 100)                | 72.0 (44.2, 99.8)               |
| Incidence | Endometrium | Restricted | 80.4 (48.3, 100)                | 54.6 (17.6, 91.6)               |
| Incidence | Esophagus   | Main       | 16.1 (0, 35.1)                  | 3.5 (0, 12.3)                   |
| Incidence | Esophagus   | Restricted | 11.5 (0, 35.4)                  | 0.2 (0, 2.0)                    |
| Incidence | Gallbladder | Main       | 85.6 (63.5, 100)                | 64.7 (37.2, 92.2)               |
| Incidence | Gallbladder | Restricted | 80.4 (53.1, 100)                | 60.0 (29.0, 91.0)               |
| Incidence | Kidney      | Main       | 67.3 (43.3, 91.4)               | 22.2 (0, 44.7)                  |
| Incidence | Kidney      | Restricted | 64.5 (34.2, 94.8)               | 15.8 (0, 43.1)                  |
| Incidence | Leukemia    | Main       | 33.1 (0, 66.2)                  | 2.0 (0, 10.4)                   |
| Incidence | Leukemia    | Restricted | 43.3 (4.6, 82.0)                | 8.7 (0, 33.1)                   |
| Incidence | Liver       | Main       | 97.8 (93.9, 100)                | 92.6 (84.1, 100)                |
| Incidence | Liver       | Restricted | 98.0 (93.5, 100)                | 93.2 (83.4, 100)                |
| Incidence | Lung        | Main       | 12.2 (0, 24.3)                  | 1.0 (0, 3.4)                    |
| Incidence | Lung        | Restricted | 5.5 (0, 16.3)                   | 0.1 (0, 0.7)                    |
| Incidence | Melanoma    | Main       | 3.4 (0, 21.5)                   | 0 (0, 0.1)                      |
| Incidence | NHL         | Main       | 23.5 (0, 48.8)                  | 2.5 (0, 10.7)                   |
| Incidence | NHL         | Restricted | 40.8 (5.2, 76.4)                | 11.0 (0, 36.1)                  |
| Incidence | Ovary       | Main       | 24.4 (0, 52.7)                  | 2.1 (0, 10.7)                   |
| Incidence | Ovary       | Restricted | 31.4 (0, 63.0)                  | 7.4 (0, 26.6)                   |
| Incidence | Pancreas    | Main       | 96.9 (92.2, 100)                | 89.9 (80.3, 99.4)               |
| Incidence | Pancreas    | Restricted | 95.2 (87.2, 100)                | 85.0 (70.6, 99.4)               |
| Incidence | Prostate*   | Main       | 36.9 (20.3, 53.5)               | 1.0 (0, 3.5)                    |
| Incidence | Prostate*   | Restricted | 47.4 (28.4, 66.3)               | 4.3 (0, 11.7)                   |
| Incidence | Rectum      | Main       | 48.7 (22.6, 74.7)               | 9.5 (0, 26.4)                   |
| Incidence | Rectum      | Restricted | 61.9 (34.0, 89.7)               | 16.0 (0, 40.5)                  |
| Incidence | Stomach     | Main       | 43.6 (24.9, 62.2)               | 20.9 (5.0, 36.9)                |
| Incidence | Stomach     | Restricted | 49.5 (27.7, 71.3)               | 26.9 (6.8, 46.9)                |
| Incidence | Thyroid     | Main       | 32.1 (0, 71.6)                  | 0.2 (0, 2.6)                    |
| Incidence | Thyroid     | Restricted | 14.8 (0, 64.9)                  | 0 (0, 0.3)                      |
| Mortality | Pancreas    | Main       | 92.1 (68.1, 100)                | 73.0 (33.9, 100)                |
| Mortality | Pancreas    | Restricted | 97.7 (84.6, 100)                | 83.3 (45.7, 100)                |

**NHL:** Non-Hodgkin's lymphoma.

**Restricted:** Bias analyses restricted to the 120 cohorts with adequate outcome assessment and follow-up.

Pre-specified relative risk 10% (30%) indicates 10% (30%) increased risk among individuals with type 2 diabetes, i.e. a pre-specified relative risk of 1.1 (1.3) for all outcomes except prostate cancer incidence.

\*For prostate cancer incidence, 10% (30%) risk indicates 10% (30%) decreased risk among individuals with type 2 diabetes, i.e. a pre-specified relative risk of 0.9 (0.7).

In restricted analysis, the heterogeneity for melanoma incidence derived from meta-analysis was 0%. Therefore, bias analysis for unmeasured confounding was not possible.

**Table S6.** Proportions of studies with an unconfounded association of type 2 diabetes with cancer in females and males: main analysis vs. restricted analysis

| Outcome   | Cancer      | Sex | Analysis   | Proportion (95% CI) [%]         |                                 |
|-----------|-------------|-----|------------|---------------------------------|---------------------------------|
|           |             |     |            | Pre-specified relative risk 10% | Pre-specified relative risk 30% |
| Incidence | Bladder     | F   | Main       | 59.7 (18.8, 100)                | 15.0 (0, 52.7)                  |
| Incidence | Bladder     | F   | Restricted | 54.2 (9.5, 99.0)                | 13.2 (0, 52.4)                  |
| Incidence | Bladder     | M   | Main       | 30.2 (5.5, 54.8)                | 1.6 (0, 8.2)                    |
| Incidence | Bladder     | M   | Restricted | 16.0 (0, 65.1)                  | 0 (0, 0)                        |
| Incidence | Colon       | F   | Main       | 64.9 (32.6, 97.3)               | 18.1 (0, 47.0)                  |
| Incidence | Colon       | F   | Restricted | 59.2 (24.1, 94.3)               | 12.9 (0, 41.1)                  |
| Incidence | Colon       | M   | Restricted | 38.9 (0, 92.8)                  | 0 (0, 0.9)                      |
| Incidence | Colorectal  | F   | Main       | 70.9 (46.5, 95.2)               | 6.7 (0, 22.9)                   |
| Incidence | Colorectal  | F   | Restricted | 67.9 (42.6, 93.3)               | 8.9 (0, 28.0)                   |
| Incidence | Colorectal  | M   | Main       | 57.7 (33.1, 82.4)               | 2.1 (0, 9.3)                    |
| Incidence | Colorectal  | M   | Restricted | 54.3 (25.7, 82.8)               | 2.7 (0, 12.7)                   |
| Incidence | Gallbladder | F   | Main       | 86.9 (46.9, 100)                | 69.2 (22.2, 100)                |
| Incidence | Gallbladder | F   | Restricted | 69.6 (27.6, 100)                | 54.1 (12.1, 96.2)               |
| Incidence | Gallbladder | M   | Main       | 84.5 (49.7, 100)                | 53.9 (17.0, 90.8)               |
| Incidence | Gallbladder | M   | Restricted | 76.0 (34.9, 100)                | 50.8 (10.2, 91.4)               |
| Incidence | Kidney      | F   | Main       | 97.6 (80.0, 100)                | 70.8 (29.6, 100)                |
| Incidence | Kidney      | F   | Restricted | 89.3 (53.1, 100)                | 56.7 (22.6, 90.8)               |
| Incidence | Kidney      | M   | Main       | 46.2 (13.2, 79.3)               | 5.9 (0, 24.8)                   |
| Incidence | Kidney      | M   | Restricted | 52.5 (9.3, 95.8)                | 10.0 (0, 44.4)                  |
| Incidence | Liver       | F   | Main       | 93.6 (80.8, 100)                | 85.7 (66.9, 100)                |
| Incidence | Liver       | F   | Restricted | 90.0 (72.4, 100)                | 80.8 (58.0, 100)                |
| Incidence | Liver       | M   | Main       | 99.4 (97.1, 100)                | 96.6 (88.1, 100)                |
| Incidence | Liver       | M   | Restricted | 99.4 (96.1, 100)                | 95.8 (83.3, 100)                |
| Incidence | Lung        | F   | Main       | 9.0 (0, 36.9)                   | 0.1 (0, 1.4)                    |
| Incidence | Lung        | F   | Restricted | 14.7 (0, 51.8)                  | 0.6 (0, 5.7)                    |
| Incidence | Lung        | M   | Main       | 14.4 (0, 35.0)                  | 2.2 (0, 9.5)                    |
| Incidence | Lung        | M   | Restricted | 18.2 (0, 49.8)                  | 1.5 (0, 9.3)                    |
| Incidence | Pancreas    | F   | Main       | 93.2 (81.2, 100)                | 84.2 (66.4, 100)                |
| Incidence | Pancreas    | F   | Restricted | 87.2 (65.9, 100)                | 70.4 (45.4, 95.4)               |
| Incidence | Pancreas    | M   | Main       | 96.6 (88.2, 100)                | 88.6 (72.1, 100)                |
| Incidence | Pancreas    | M   | Restricted | 92.8 (74.0, 100)                | 80.7 (52.7, 100)                |
| Incidence | Rectum      | F   | Main       | 57.3 (16.0, 98.6)               | 13.2 (0, 53.4)                  |
| Incidence | Rectum      | F   | Restricted | 71.8 (12.3, 100)                | 12.1 (0, 69.1)                  |
| Incidence | Rectum      | M   | Main       | 0.3 (0, 11.7)                   | 0 (0, 0)                        |
| Incidence | Rectum      | M   | Restricted | 0 (0, 0)                        | 0 (0, 0)                        |
| Incidence | Stomach     | F   | Main       | 55.7 (25.7, 85.6)               | 31.6 (2.4, 60.8)                |
| Incidence | Stomach     | F   | Restricted | 53.7 (21.6, 85.8)               | 34.3 (3.0, 65.7)                |
| Incidence | Stomach     | M   | Main       | 23.9 (0.2, 47.6)                | 6.8 (0, 21.0)                   |
| Incidence | Stomach     | M   | Restricted | 33.4 (4.0, 62.8)                | 13.0 (0, 35.7)                  |

**F:** female; **M:** male.

**Restricted:** Bias analyses restricted to the 120 cohorts with adequate outcome assessment and follow-up.

Pre-specified relative risk 10% (30%) indicates 10% (30%) increased risk among individuals with type 2 diabetes, i.e. a pre-specified relative risk of 1.1 (1.3) for all outcomes. In the main analysis, the heterogeneity for colon cancer incidence in males derived from meta-analysis was 0%. Therefore, bias analysis for unmeasured confounding was not possible.



**Figure S1.** Study selection diagram

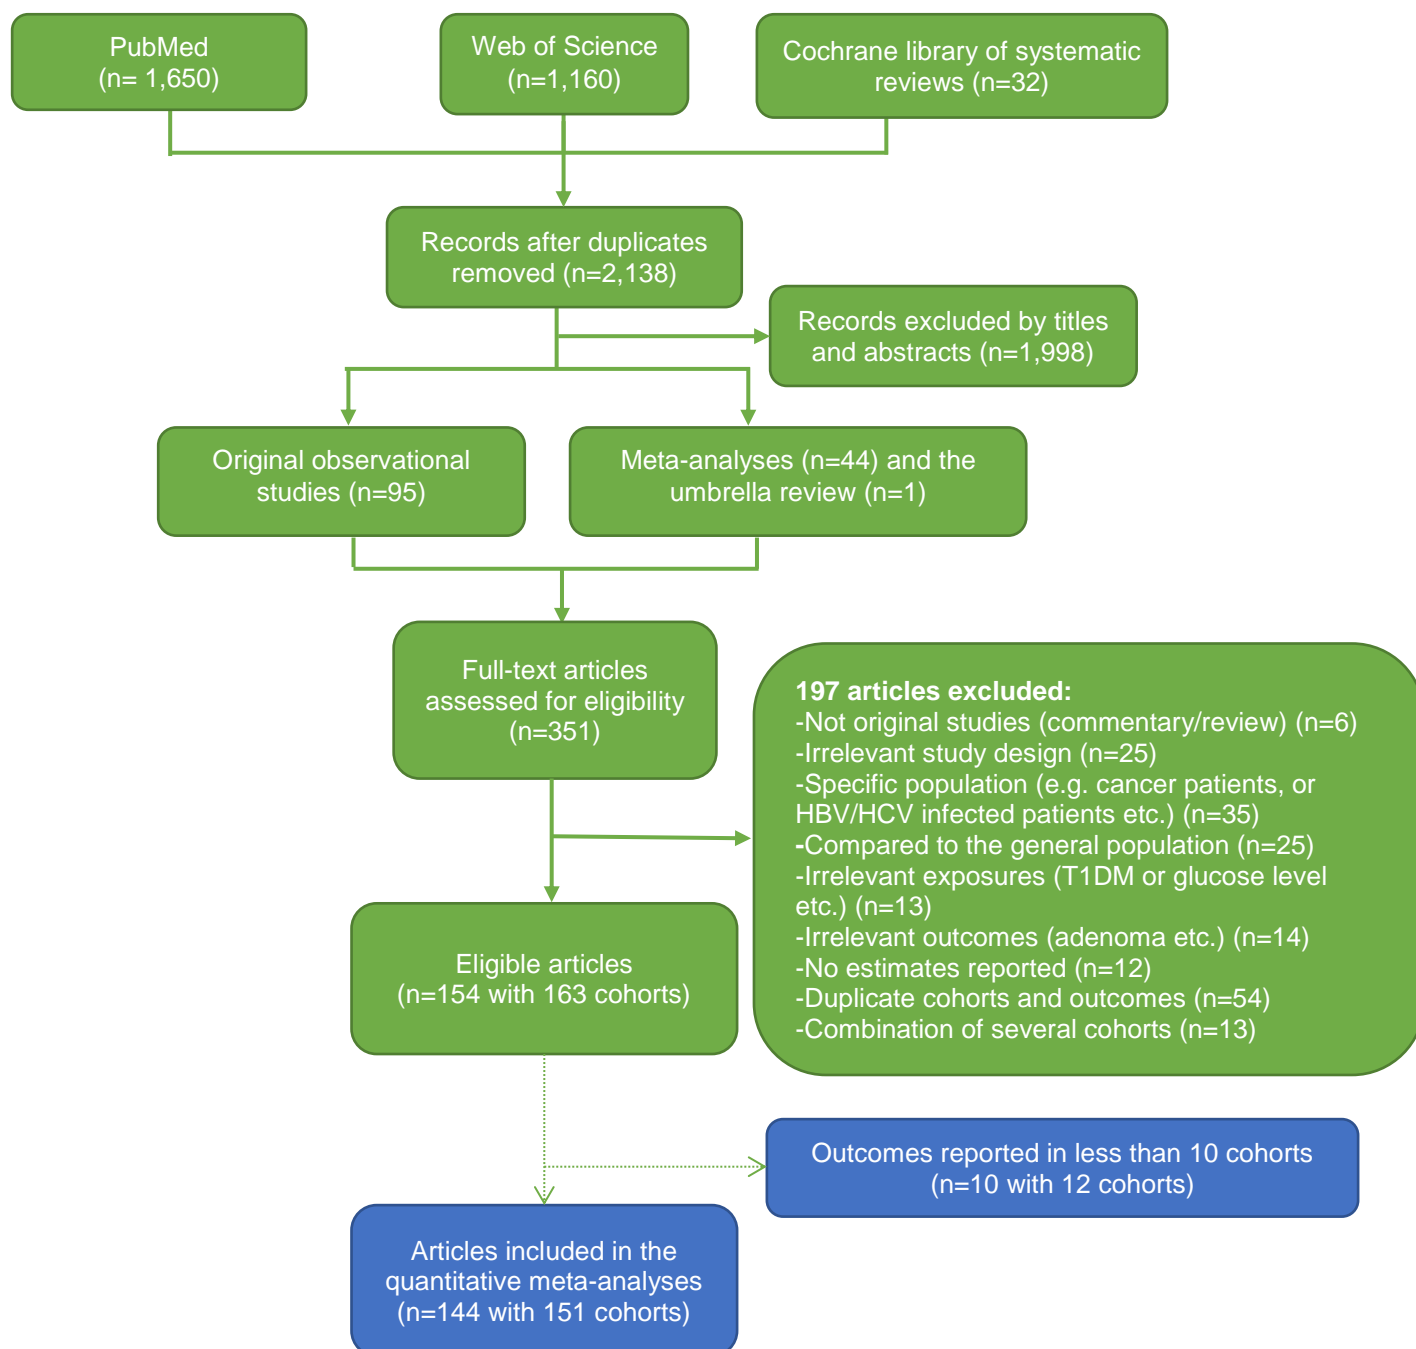

1. **PubMed search:** *diabetes[title] AND (cancer[title/abstract] OR carcinoma[title/abstract] OR neoplasia[title/abstract] OR tumor[title/abstract] OR neoplasm[title/abstract] OR maligna\*[title/abstract]) in Humans* between 01/12/2013 and 10/01/2019

2. **Web of Science search [Science Citation Index Expanded (SCI-EXPANDED), Conference Proceedings Citation Index- Science (CPCI-S), Emerging Sources Citation Index (ESCI)]:** *diabetes[title] AND (cancer[title] OR carcinoma[title] OR neoplasia[title] OR tumor[title] OR neoplasm[title] OR maligna\*[title])* between 2013 and 2019

3. **Cochrane Library of Systematic Reviews search:** *diabetes[title/abstract/keywords] AND (cancer[title/abstract/keywords] OR carcinoma[title/abstract/keywords] OR neoplasia[title/abstract/keywords] OR tumor[title/abstract/keywords] OR neoplasm[title/abstract/keywords] OR maligna\*[title/abstract/keywords])* between 01/12/2013 and 10/01/2019

**Figure S2. Statistical analysis methodology diagram**

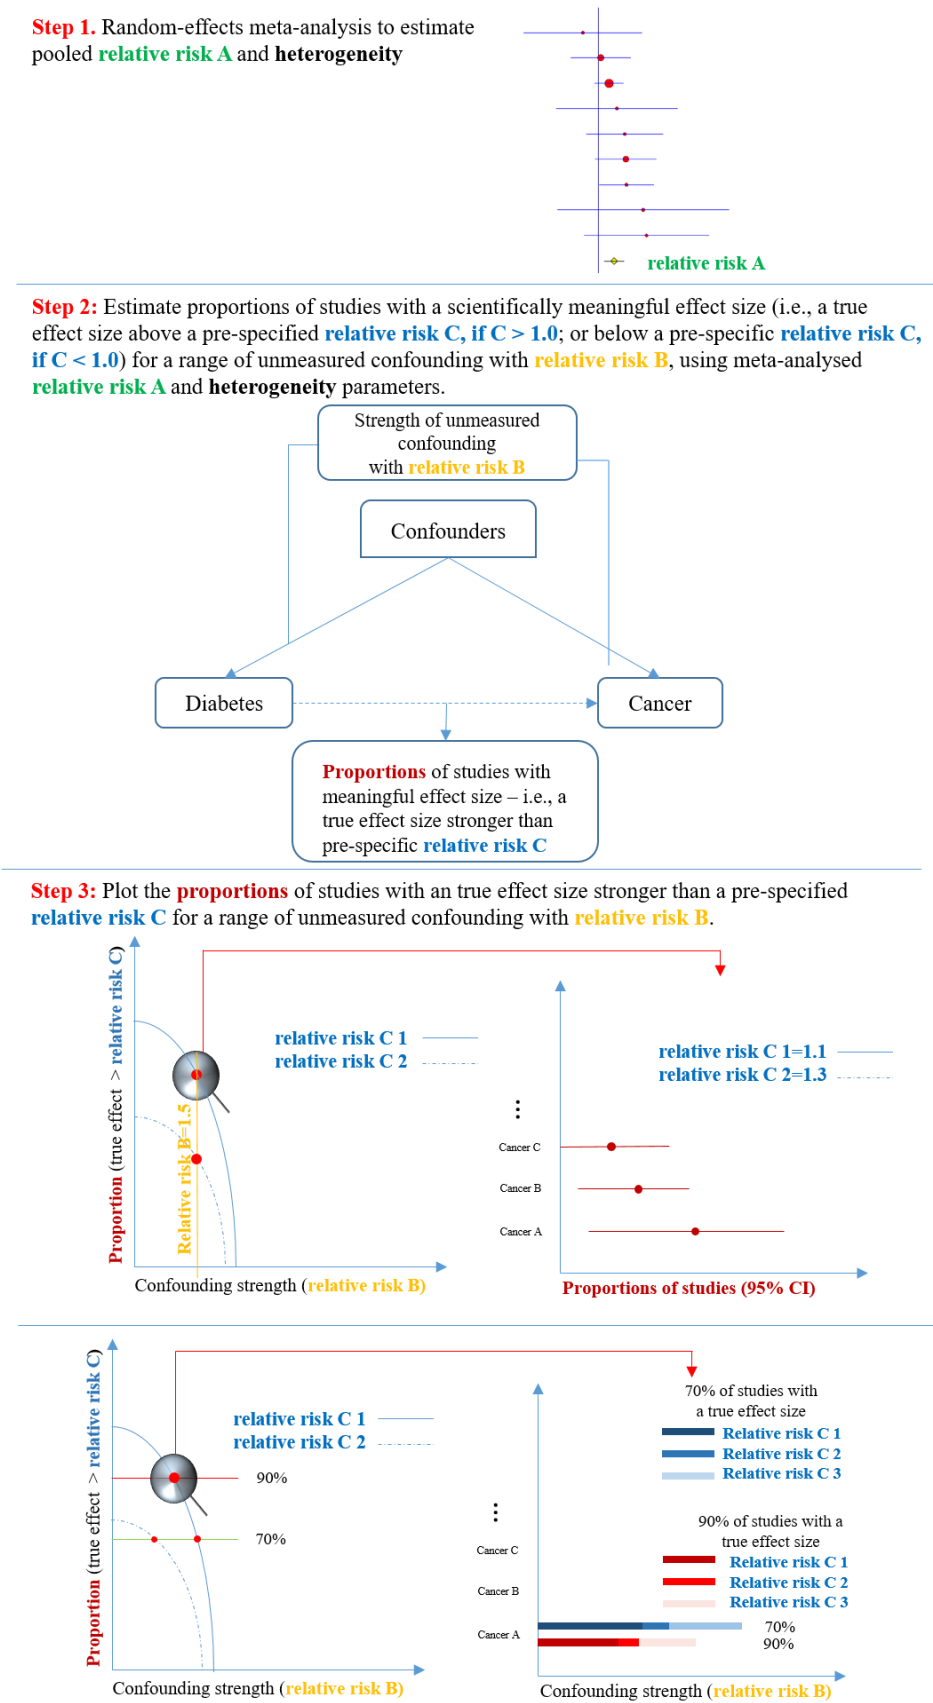

**Relative risk A:** pooled from random-effects meta-analysis (fixed); **Relative risk B:** ranged from 1.0 to 4.0; **Relative risk C:** ranged from 0.5 to 2.0

In bias analysis, we used the method proposed by Mathur and VanderWeele to analytically bound the effect of unmeasured confounding on the results of a meta-analysis. Specifically, we used the pooled relative risk and heterogeneity (variance between studies) and their standard errors derived from random-effects meta-analysis (step 1), to make inference to the population distribution of true causal effects, then in turn to estimate the proportions of studies with scientifically meaningful effect size (a pre-specified relative risk) and its 95% confidence intervals, under different levels of unmeasured confounding (step 2). The proportion of studies with scientifically meaningful effect sizes in the meta-analysis is a useful tool to characterize the evidence strength when the effects are heterogeneous.

**Figure S3.** Distribution of Newcastle-Ottawa Scale score of included 151 cohorts

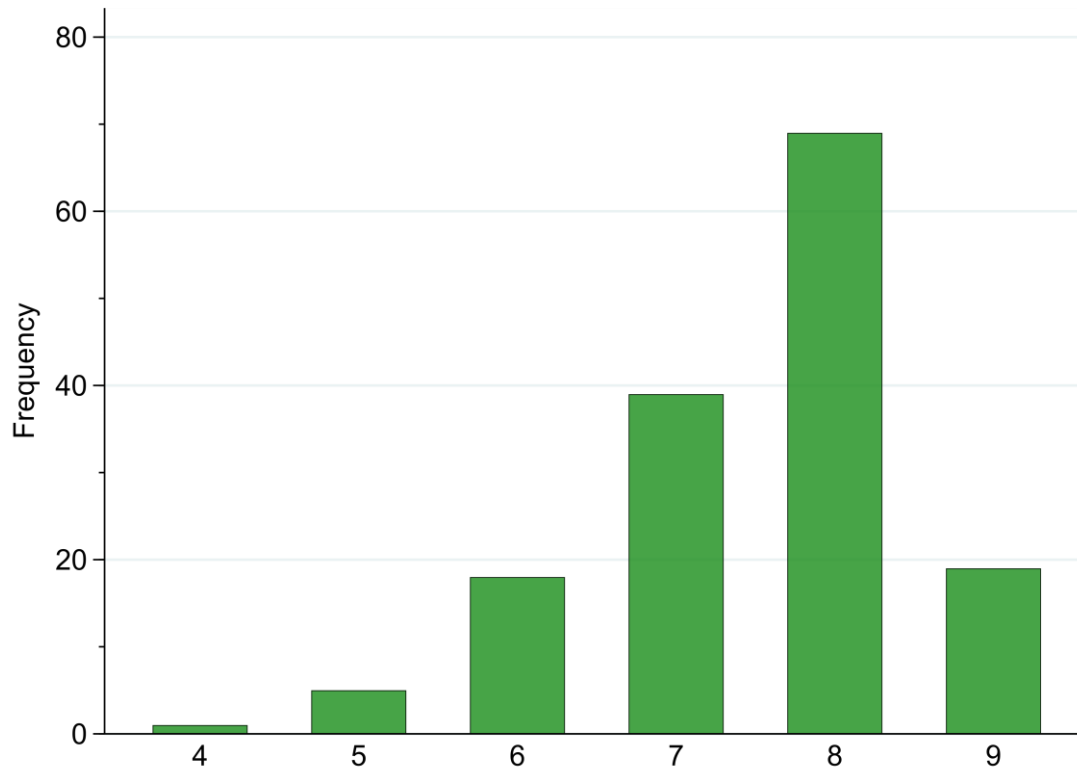

**Newcastle-Ottawa Scale score:** quality assessment of included studies.

The score is obtained as the sum of the questionnaire in 3 domains: maximum 4 scores in selection (representative of the exposed cohort, representative of the non-exposed cohort, ascertainment of exposure, and the outcome of interest was not present at start of study), maximum 2 score in comparability (the study controls for age and sex, the study controls for body mass index); and maximum 3 scores in outcome (assessment of outcome, follow-up long enough, and adequacy of follow-up cohorts).

Figure S4a. Individual and overall estimates, by cancer

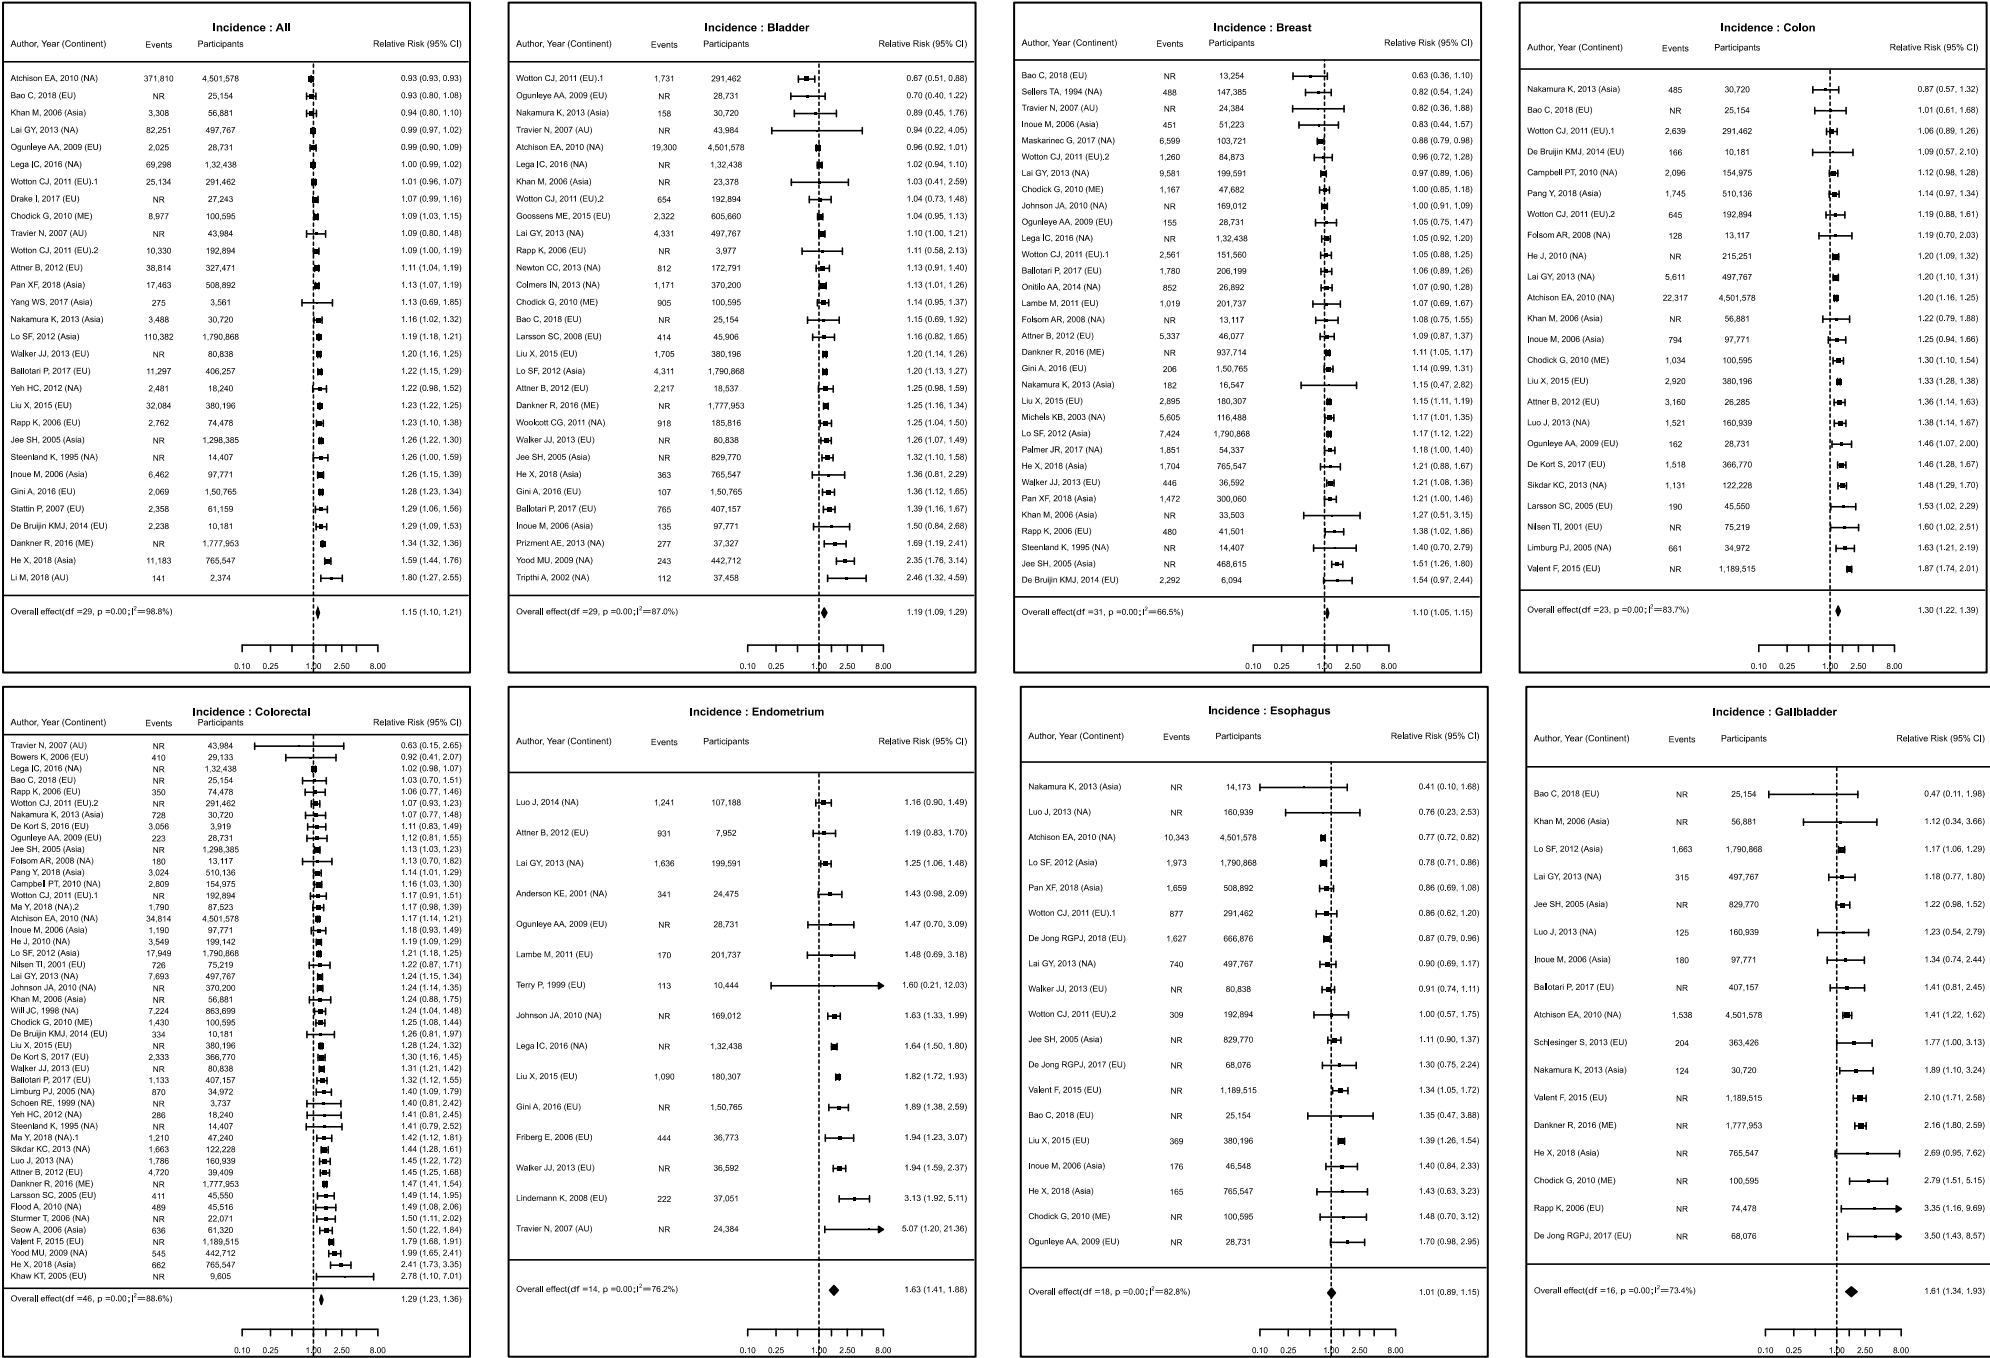

Figure S4b. Individual and overall estimates, by cancer

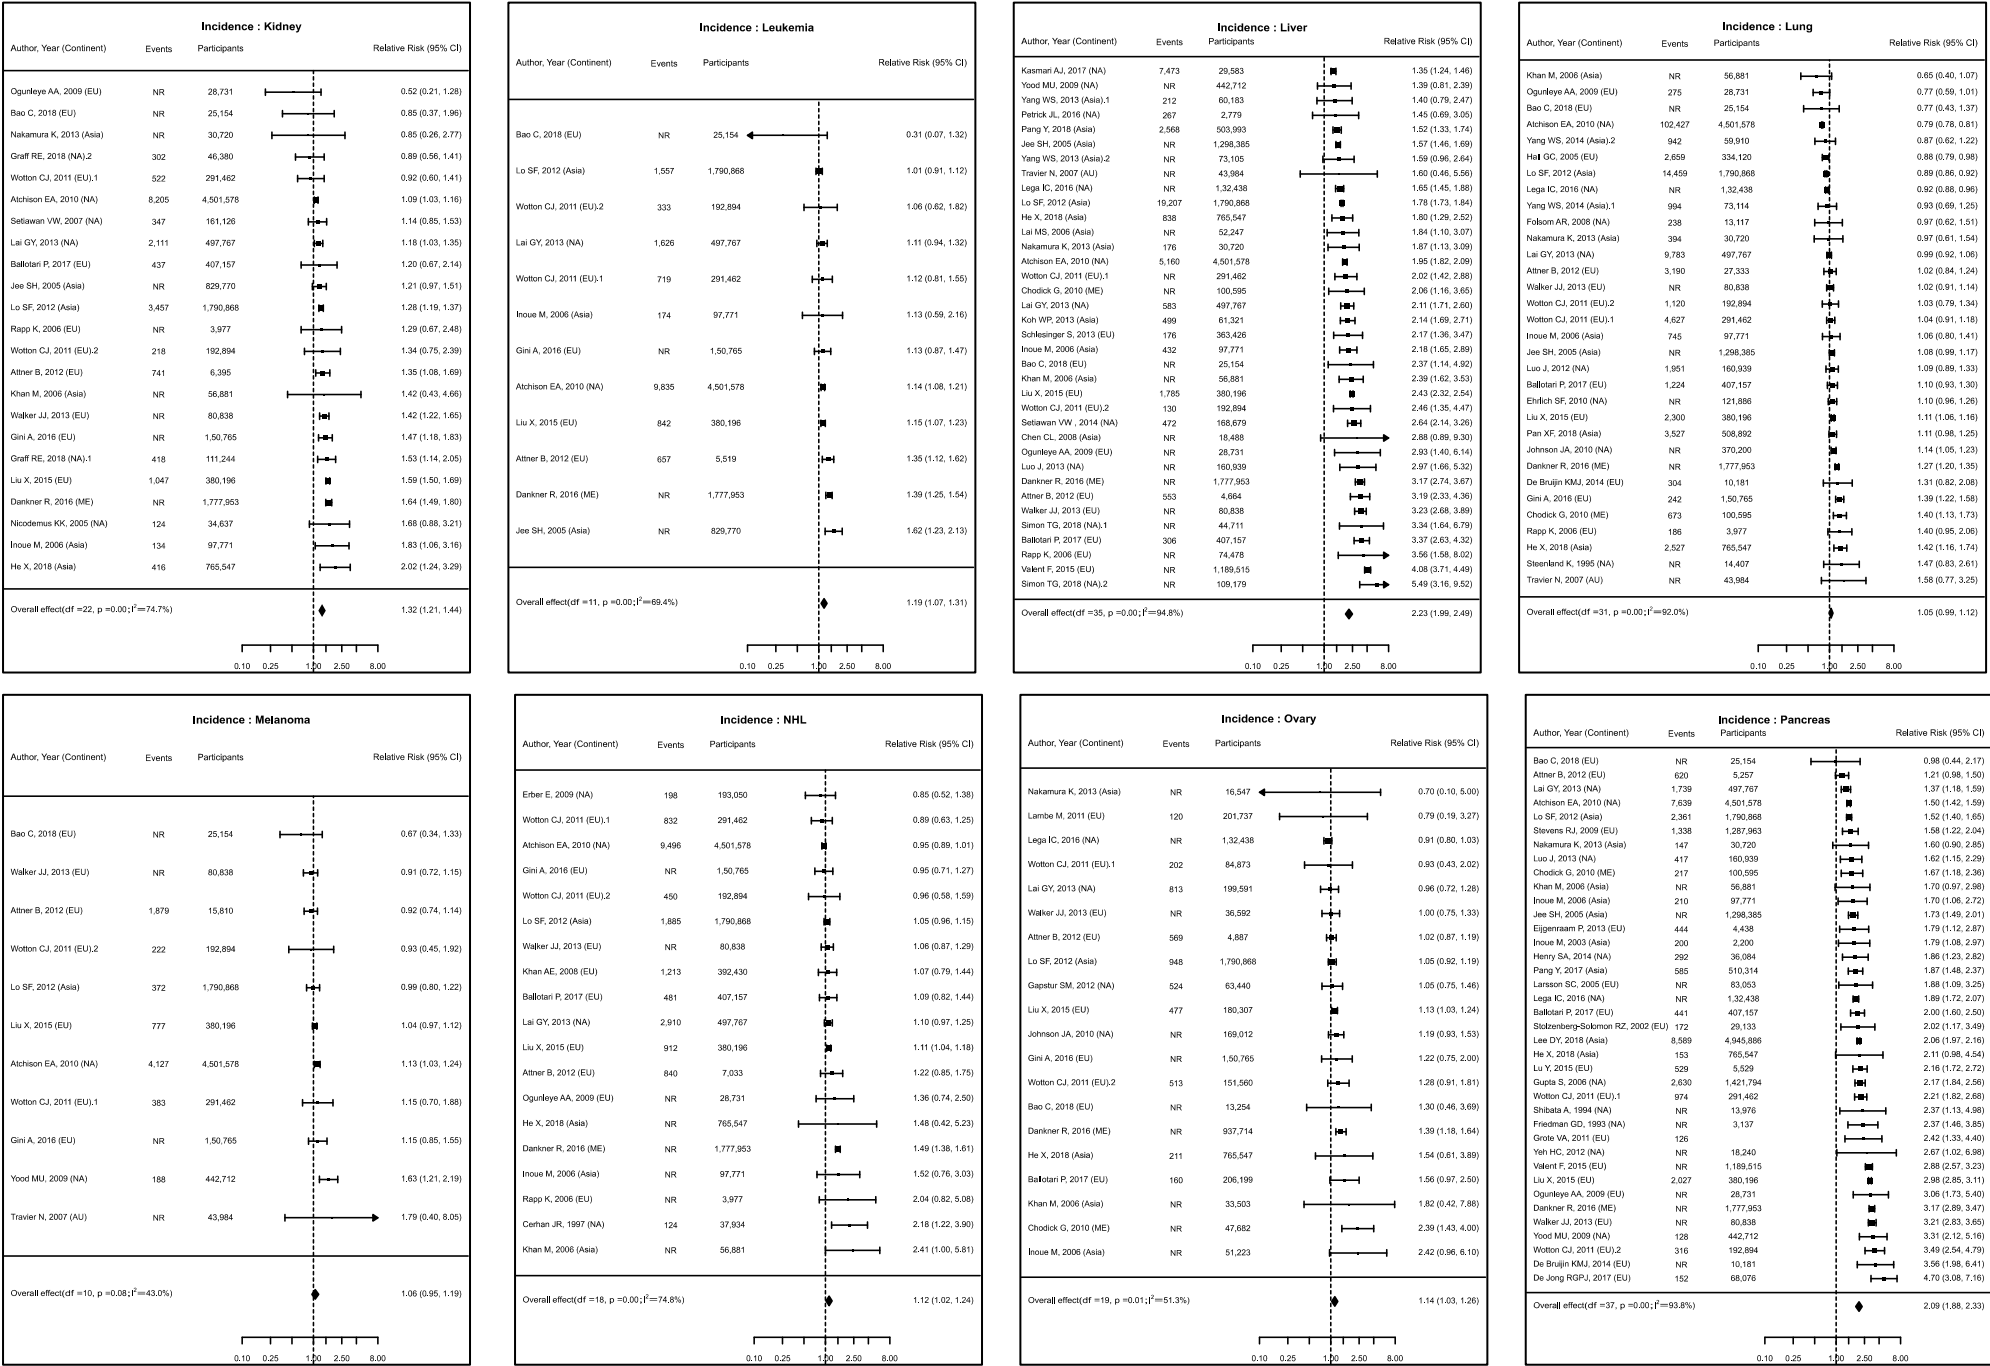

Incidence : Lung

| Author, Year (Continent)                              | Events  | Participants | Relative Risk (95% CI) |
|-------------------------------------------------------|---------|--------------|------------------------|
| Khan M, 2006 (Asia)                                   | NR      | 56,881       | 0.65 (0.40, 1.07)      |
| Ogunleye AA, 2009 (EU)                                | 275     | 28,731       | 0.77 (0.59, 1.01)      |
| Bao C, 2018 (EU)                                      | NR      | 25,154       | 0.77 (0.43, 1.37)      |
| Atchison EA, 2010 (NA)                                | 102,427 | 4,501,578    | 0.79 (0.78, 0.81)      |
| Yang WS, 2014 (Asia),2                                | 942     | 59,910       | 0.87 (0.62, 1.22)      |
| Hui GC, 2005 (EU)                                     | 2,659   | 334,120      | 0.88 (0.79, 0.98)      |
| Lo SF, 2012 (Asia)                                    | 14,459  | 1,790,868    | 0.89 (0.86, 0.92)      |
| Legia IC, 2016 (NA)                                   | NR      | 1,324,438    | 0.92 (0.88, 0.96)      |
| Yang WS, 2014 (Asia),1                                | 994     | 73,114       | 0.93 (0.69, 1.25)      |
| Folsom AR, 2008 (NA)                                  | 238     | 13,117       | 0.97 (0.62, 1.51)      |
| Nakamura K, 2013 (Asia)                               | 394     | 30,720       | 0.97 (0.61, 1.54)      |
| Lai GY, 2013 (NA)                                     | 9,783   | 497,767      | 0.99 (0.92, 1.06)      |
| Altner B, 2012 (EU)                                   | 3,190   | 27,333       | 1.02 (0.84, 1.24)      |
| Walker JJ, 2013 (EU)                                  | NR      | 80,838       | 1.02 (0.91, 1.14)      |
| Wotton CJ, 2011 (EU),2                                | 1,120   | 192,894      | 1.03 (0.79, 1.34)      |
| Wotton CJ, 2011 (EU),1                                | 4,627   | 291,462      | 1.04 (0.91, 1.18)      |
| Inoue M, 2006 (Asia)                                  | 745     | 97,771       | 1.06 (0.80, 1.41)      |
| He SH, 2005 (Asia)                                    | NR      | 1,298,385    | 1.06 (0.98, 1.17)      |
| Luo J, 2012 (NA)                                      | 1,951   | 160,939      | 1.09 (0.89, 1.33)      |
| Ballotari P, 2017 (EU)                                | 1,224   | 407,157      | 1.10 (0.93, 1.30)      |
| Ehrlich SF, 2010 (NA)                                 | NR      | 121,886      | 1.10 (0.96, 1.26)      |
| Liu X, 2015 (EU)                                      | 2,300   | 380,196      | 1.11 (1.06, 1.16)      |
| Pan XF, 2018 (Asia)                                   | 3,527   | 806,892      | 1.11 (0.98, 1.25)      |
| Johnson JA, 2010 (NA)                                 | NR      | 370,200      | 1.14 (1.05, 1.23)      |
| Dankner R, 2016 (ME)                                  | NR      | 1,777,953    | 1.27 (1.20, 1.35)      |
| De Bruijn KMJ, 2014 (EU)                              | 304     | 10,181       | 1.31 (0.82, 2.08)      |
| Gini A, 2016 (EU)                                     | 242     | 1,50,765     | 1.39 (1.22, 1.58)      |
| Chodick G, 2010 (ME)                                  | 673     | 100,595      | 1.40 (1.13, 1.73)      |
| Rapp K, 2006 (EU)                                     | 186     | 3,977        | 1.40 (0.95, 2.06)      |
| He X, 2018 (Asia)                                     | 2,527   | 765,547      | 1.42 (1.16, 1.74)      |
| Steenland K, 1995 (NA)                                | NR      | 14,407       | 1.47 (0.83, 2.61)      |
| Travler N, 2007 (AU)                                  | NR      | 43,984       | 1.58 (0.77, 3.25)      |
| Overall effect(df =31, p =0.00;I <sup>2</sup> =92.0%) |         |              | 1.05 (0.99, 1.12)      |

0.10 0.25 1.00 2.50 8.00

Incidence : Melanoma

| Author, Year (Continent)                              | Events | Participants | Relative Risk (95% CI) |
|-------------------------------------------------------|--------|--------------|------------------------|
| Bao C, 2018 (EU)                                      | NR     | 25,154       | 0.67 (0.34, 1.33)      |
| Walker JJ, 2013 (EU)                                  | NR     | 80,838       | 0.91 (0.72, 1.15)      |
| Altner B, 2012 (EU)                                   | 1,879  | 15,810       | 0.92 (0.74, 1.14)      |
| Wotton CJ, 2011 (EU),2                                | 222    | 192,894      | 0.93 (0.45, 1.92)      |
| Lo SF, 2012 (Asia)                                    | 372    | 1,790,868    | 0.99 (0.80, 1.22)      |
| Liu X, 2015 (EU)                                      | 777    | 380,196      | 1.04 (0.97, 1.12)      |
| Atchison EA, 2010 (NA)                                | 4,127  | 4,501,578    | 1.13 (1.03, 1.24)      |
| Wotton CJ, 2011 (EU),1                                | 383    | 291,462      | 1.15 (0.74, 1.88)      |
| Gini A, 2016 (EU)                                     | NR     | 1,50,765     | 1.15 (0.85, 1.55)      |
| Yood MU, 2009 (NA)                                    | 188    | 442,712      | 1.63 (1.21, 2.19)      |
| Travler N, 2007 (AU)                                  | NR     | 43,984       | 1.79 (0.40, 8.05)      |
| Overall effect(df =10, p =0.08;I <sup>2</sup> =43.0%) |        |              | 1.06 (0.95, 1.19)      |

0.10 0.25 1.00 2.50 8.00

Incidence : NHL

| Author, Year (Continent)                              | Events | Participants | Relative Risk (95% CI) |
|-------------------------------------------------------|--------|--------------|------------------------|
| Etter E, 2009 (NA)                                    | 198    | 193,050      | 0.85 (0.52, 1.38)      |
| Wotton CJ, 2011 (EU),1                                | 832    | 291,462      | 0.89 (0.63, 1.25)      |
| Atchison EA, 2010 (NA)                                | 9,496  | 4,501,578    | 0.95 (0.89, 1.01)      |
| Gini A, 2016 (EU)                                     | NR     | 1,50,765     | 0.95 (0.71, 1.27)      |
| Wotton CJ, 2011 (EU),2                                | 450    | 192,894      | 0.96 (0.58, 1.59)      |
| Lo SF, 2012 (Asia)                                    | 1,885  | 1,790,868    | 1.05 (0.96, 1.15)      |
| Walker JJ, 2013 (EU)                                  | NR     | 80,838       | 1.06 (0.87, 1.29)      |
| Khan AE, 2008 (EU)                                    | 1,213  | 392,430      | 1.07 (0.79, 1.44)      |
| Ballotari P, 2017 (EU)                                | 481    | 407,157      | 1.09 (0.82, 1.44)      |
| Lai GY, 2013 (NA)                                     | 2,910  | 497,767      | 1.10 (0.97, 1.25)      |
| Liu X, 2015 (EU)                                      | 912    | 380,196      | 1.11 (1.04, 1.18)      |
| Altner B, 2012 (EU)                                   | 840    | 7,033        | 1.22 (0.85, 1.75)      |
| Ogunleye AA, 2009 (EU)                                | NR     | 28,731       | 1.36 (0.74, 2.50)      |
| He X, 2018 (Asia)                                     | NR     | 765,547      | 1.48 (0.42, 5.23)      |
| Dankner R, 2016 (ME)                                  | NR     | 1,777,953    | 1.49 (1.38, 1.61)      |
| Inoue M, 2006 (Asia)                                  | NR     | 97,771       | 1.52 (0.76, 3.03)      |
| Rapp K, 2006 (EU)                                     | NR     | 3,977        | 2.04 (0.82, 5.08)      |
| Cerhan JR, 1997 (NA)                                  | 124    | 37,934       | 2.18 (1.22, 3.90)      |
| Khan M, 2006 (Asia)                                   | NR     | 56,881       | 2.41 (1.00, 5.81)      |
| Overall effect(df =18, p =0.00;I <sup>2</sup> =74.8%) |        |              | 1.12 (1.02, 1.24)      |

0.10 0.25 1.00 2.50 8.00

Incidence : Ovary

| Author, Year (Continent)                              | Events | Participants | Relative Risk (95% CI) |
|-------------------------------------------------------|--------|--------------|------------------------|
| Nakamura K, 2013 (Asia)                               | NR     | 16,547       | 0.70 (0.10, 5.00)      |
| Lambie M, 2011 (EU)                                   | 120    | 201,737      | 0.79 (0.19, 3.27)      |
| Legia IC, 2016 (NA)                                   | NR     | 1,324,438    | 0.91 (0.80, 1.03)      |
| Wotton CJ, 2011 (EU),1                                | 202    | 84,873       | 0.93 (0.43, 2.02)      |
| Lai GY, 2013 (NA)                                     | 813    | 199,591      | 0.96 (0.72, 1.28)      |
| Walker JJ, 2013 (EU)                                  | NR     | 36,592       | 1.00 (0.75, 1.33)      |
| Altner B, 2012 (EU)                                   | 569    | 4,887        | 1.02 (0.87, 1.19)      |
| Lo SF, 2012 (Asia)                                    | 948    | 1,790,868    | 1.05 (0.82, 1.19)      |
| Gapstur SM, 2012 (NA)                                 | 524    | 63,440       | 1.05 (0.75, 1.46)      |
| Liu X, 2015 (EU)                                      | 477    | 180,307      | 1.13 (1.03, 1.24)      |
| Johnson JA, 2010 (NA)                                 | NR     | 169,012      | 1.19 (0.93, 1.53)      |
| Gini A, 2016 (EU)                                     | NR     | 1,50,765     | 1.22 (0.75, 2.00)      |
| Wotton CJ, 2011 (EU),2                                | 513    | 151,560      | 1.28 (0.91, 1.81)      |
| Bao C, 2018 (EU)                                      | NR     | 13,254       | 1.30 (0.46, 3.69)      |
| Dankner R, 2016 (ME)                                  | NR     | 937,714      | 1.39 (1.18, 1.64)      |
| He X, 2018 (Asia)                                     | 211    | 765,547      | 1.54 (0.61, 3.89)      |
| Ballotari P, 2017 (EU)                                | 160    | 206,199      | 1.56 (0.97, 2.50)      |
| Khan M, 2006 (Asia)                                   | NR     | 33,503       | 1.82 (0.42, 7.86)      |
| Chodick G, 2010 (ME)                                  | NR     | 47,882       | 2.39 (1.43, 4.00)      |
| Inoue M, 2006 (Asia)                                  | NR     | 51,223       | 2.42 (0.98, 6.10)      |
| Overall effect(df =19, p =0.01;I <sup>2</sup> =51.3%) |        |              | 1.14 (1.03, 1.26)      |

0.10 0.25 1.00 2.50 8.00

Incidence : Pancreas

| Author, Year (Continent)          | Events | Participants | Relative Risk (95% CI) |
|-----------------------------------|--------|--------------|------------------------|
| Bao C, 2018 (EU)                  | NR     | 25,154       | 0.98 (0.44, 2.17)      |
| Altner B, 2012 (EU)               | 620    | 5,257        | 1.21 (0.98, 1.50)      |
| Lai GY, 2013 (NA)                 | 1,739  | 497,767      | 1.37 (1.18, 1.59)      |
| Atchison EA, 2010 (NA)            | 7,639  | 4,501,578    | 1.50 (1.42, 1.59)      |
| Lo SF, 2012 (Asia)                | 2,361  | 1,790,868    | 1.52 (1.40, 1.65)      |
| Stevens RJ, 2009 (EU)             | 1,338  | 1,287,963    | 1.58 (1.22, 2.04)      |
| Nakamura K, 2013 (Asia)           | 147    | 30,720       | 1.60 (0.90, 2.85)      |
| Luo J, 2013 (NA)                  | 417    | 160,939      | 1.62 (1.15, 2.29)      |
| Chodick G, 2010 (ME)              | 217    | 100,595      | 1.67 (1.18, 2.36)      |
| Khan M, 2006 (Asia)               | NR     | 56,881       | 1.70 (0.97, 2.98)      |
| Inoue M, 2006 (Asia)              | 210    | 97,771       | 1.70 (1.06, 2.72)      |
| Joe SH, 2005 (Asia)               | NR     | 1,298,385    | 1.73 (1.49, 2.01)      |
| Eigenraam P, 2013 (EU)            | 444    | 4,438        | 1.79 (1.12, 2.87)      |
| Inoue M, 2003 (Asia)              | 200    | 2,200        | 1.79 (1.08, 2.97)      |
| Henry SA, 2014 (NA)               | 292    | 36,084       | 1.86 (1.23, 2.82)      |
| Larsson SC, 2005 (EU)             | 585    | 510,314      | 1.87 (1.48, 2.37)      |
| Legia IC, 2016 (NA)               | NR     | 63,063       | 1.88 (1.09, 3.25)      |
| Legia IC, 2016 (NA)               | NR     | 1,324,438    | 1.89 (1.72, 2.07)      |
| Ballotari P, 2017 (EU)            | 441    | 407,157      | 2.00 (1.60, 2.50)      |
| Stolzenberg-Solomon RZ, 2002 (EU) | 172    | 29,133       | 2.02 (1.17, 3.49)      |
| Lee DY, 2018 (Asia)               | 8,589  | 4,945,886    | 2.06 (1.97, 2.16)      |
| Li Y, 2015 (EU)                   | 153    | 765,547      | 2.11 (0.98, 4.54)      |
| Gupta S, 2008 (NA)                | 529    | 5,529        | 2.16 (1.72, 2.72)      |
| Yood MU, 2009 (NA)                | NR     | 1,421,794    | 2.17 (1.84, 2.56)      |
| Wotton CJ, 2011 (EU),1            | 974    | 291,462      | 2.21 (1.82, 2.68)      |
| Shibata A, 1994 (NA)              | NR     | 1,976        | 2.37 (1.13, 4.98)      |
| Friedman GD, 1993 (NA)            | NR     | 3,137        | 2.37 (1.46, 3.85)      |
| Grote VA, 2011 (EU)               | 126    |              | 2.42 (1.33, 4.40)      |
| Yeh HC, 2012 (NA)                 | NR     | 18,240       | 2.67 (1.02, 6.98)      |
| Vakari F, 2015 (EU)               | NR     | 1,189,515    | 2.88 (2.57, 3.23)      |
| Liu X, 2015 (EU)                  | 2,027  | 380,196      | 2.98 (2.85, 3.11)      |
| Ogunleye AA, 2009 (EU)            | NR     | 28,731       | 3.06 (1.73, 5.40)      |
| Dankner R, 2016 (ME)              | NR     | 1,777,953    | 3.17 (2.89, 3.47)      |
| Walker JJ, 2013 (EU)              | NR     |              |                        |



Figure S4c. Individual and overall estimates, by cancer

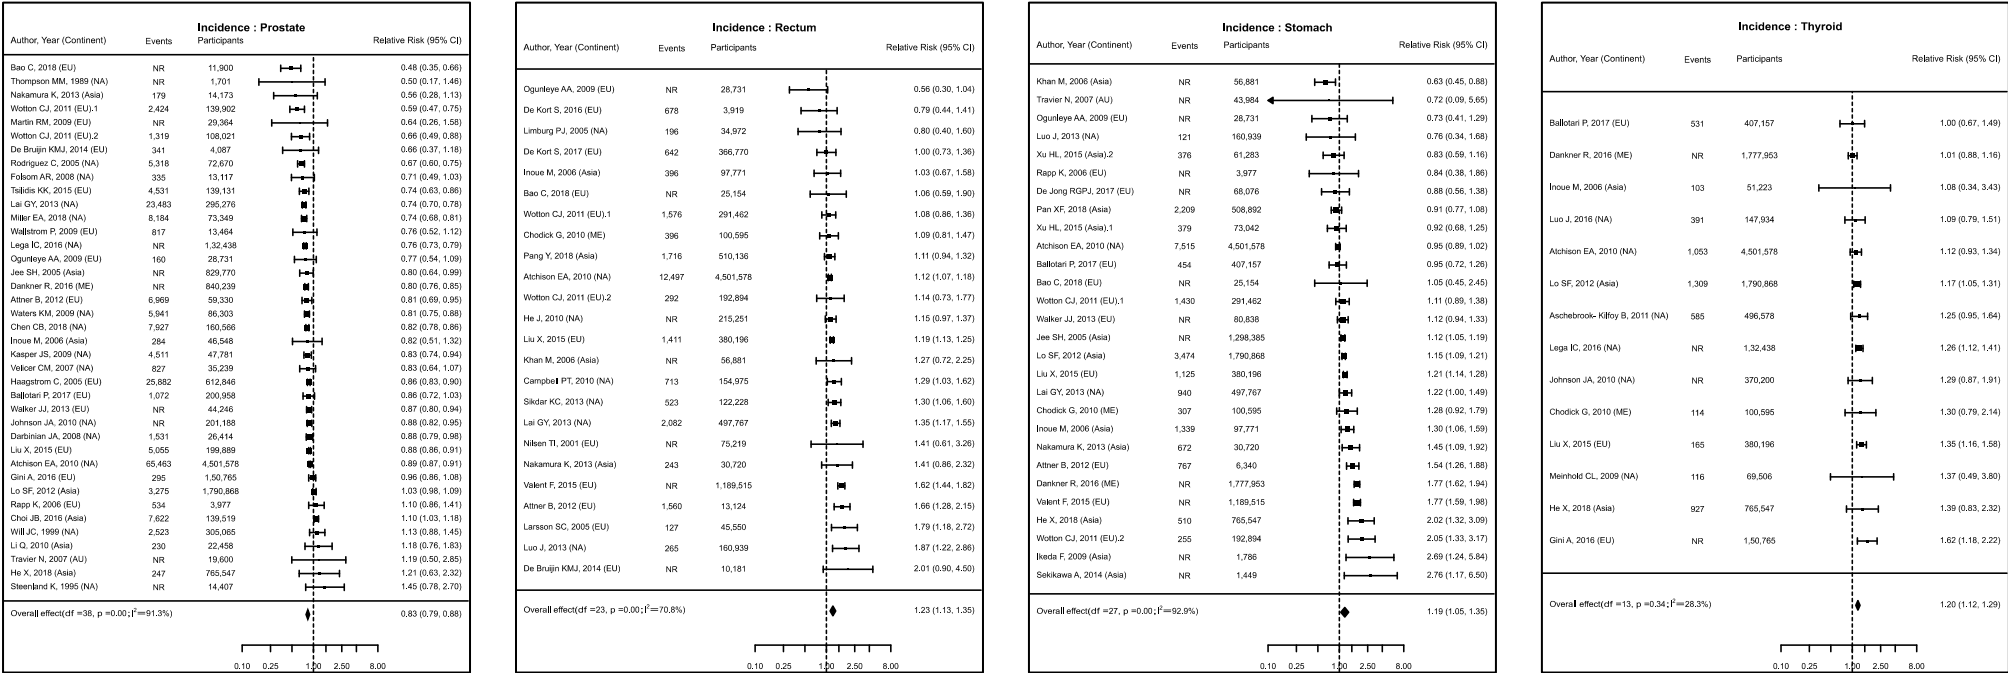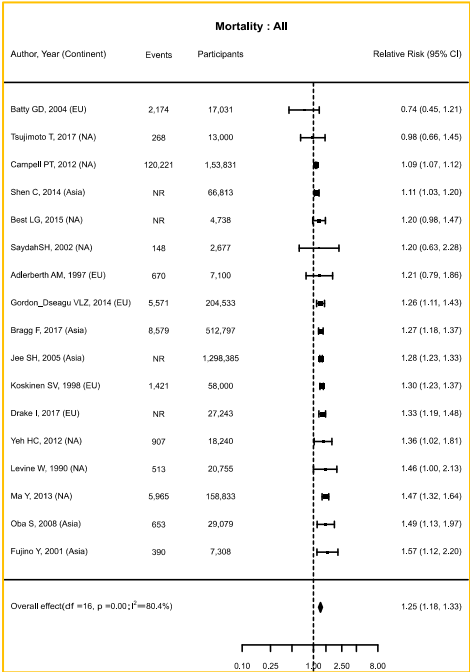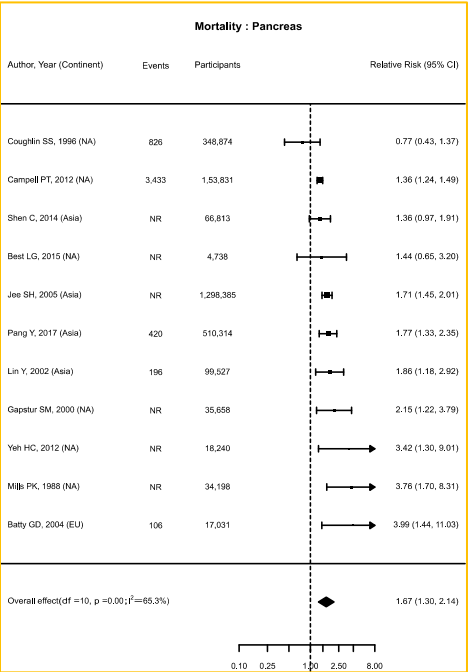

NR: Not Reported in the original study; NHL: Non-Hodgkin's Lymphoma. Black border: Incidence; Yellow border: Mortality

**Figure S5a.** Publication bias, by cancer

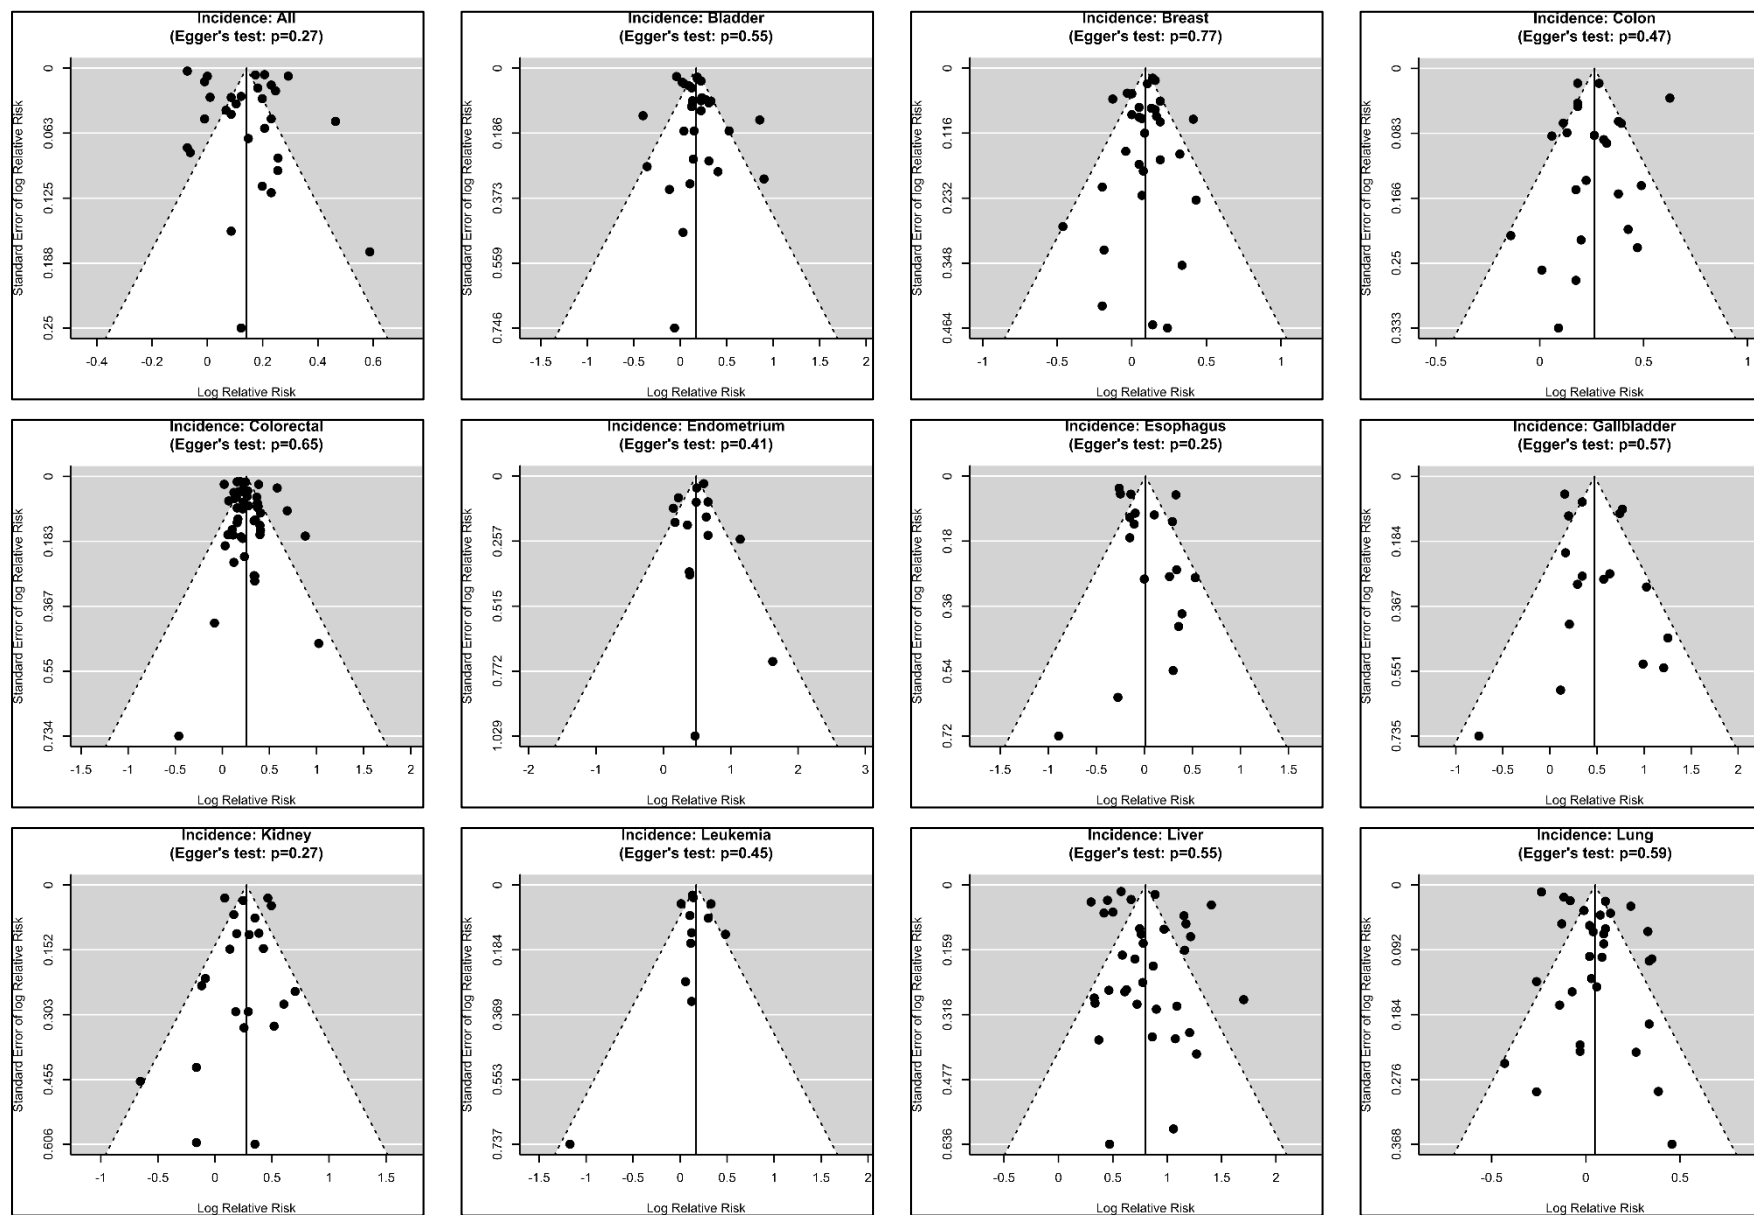

Figure S5b. Publication bias, by cancer

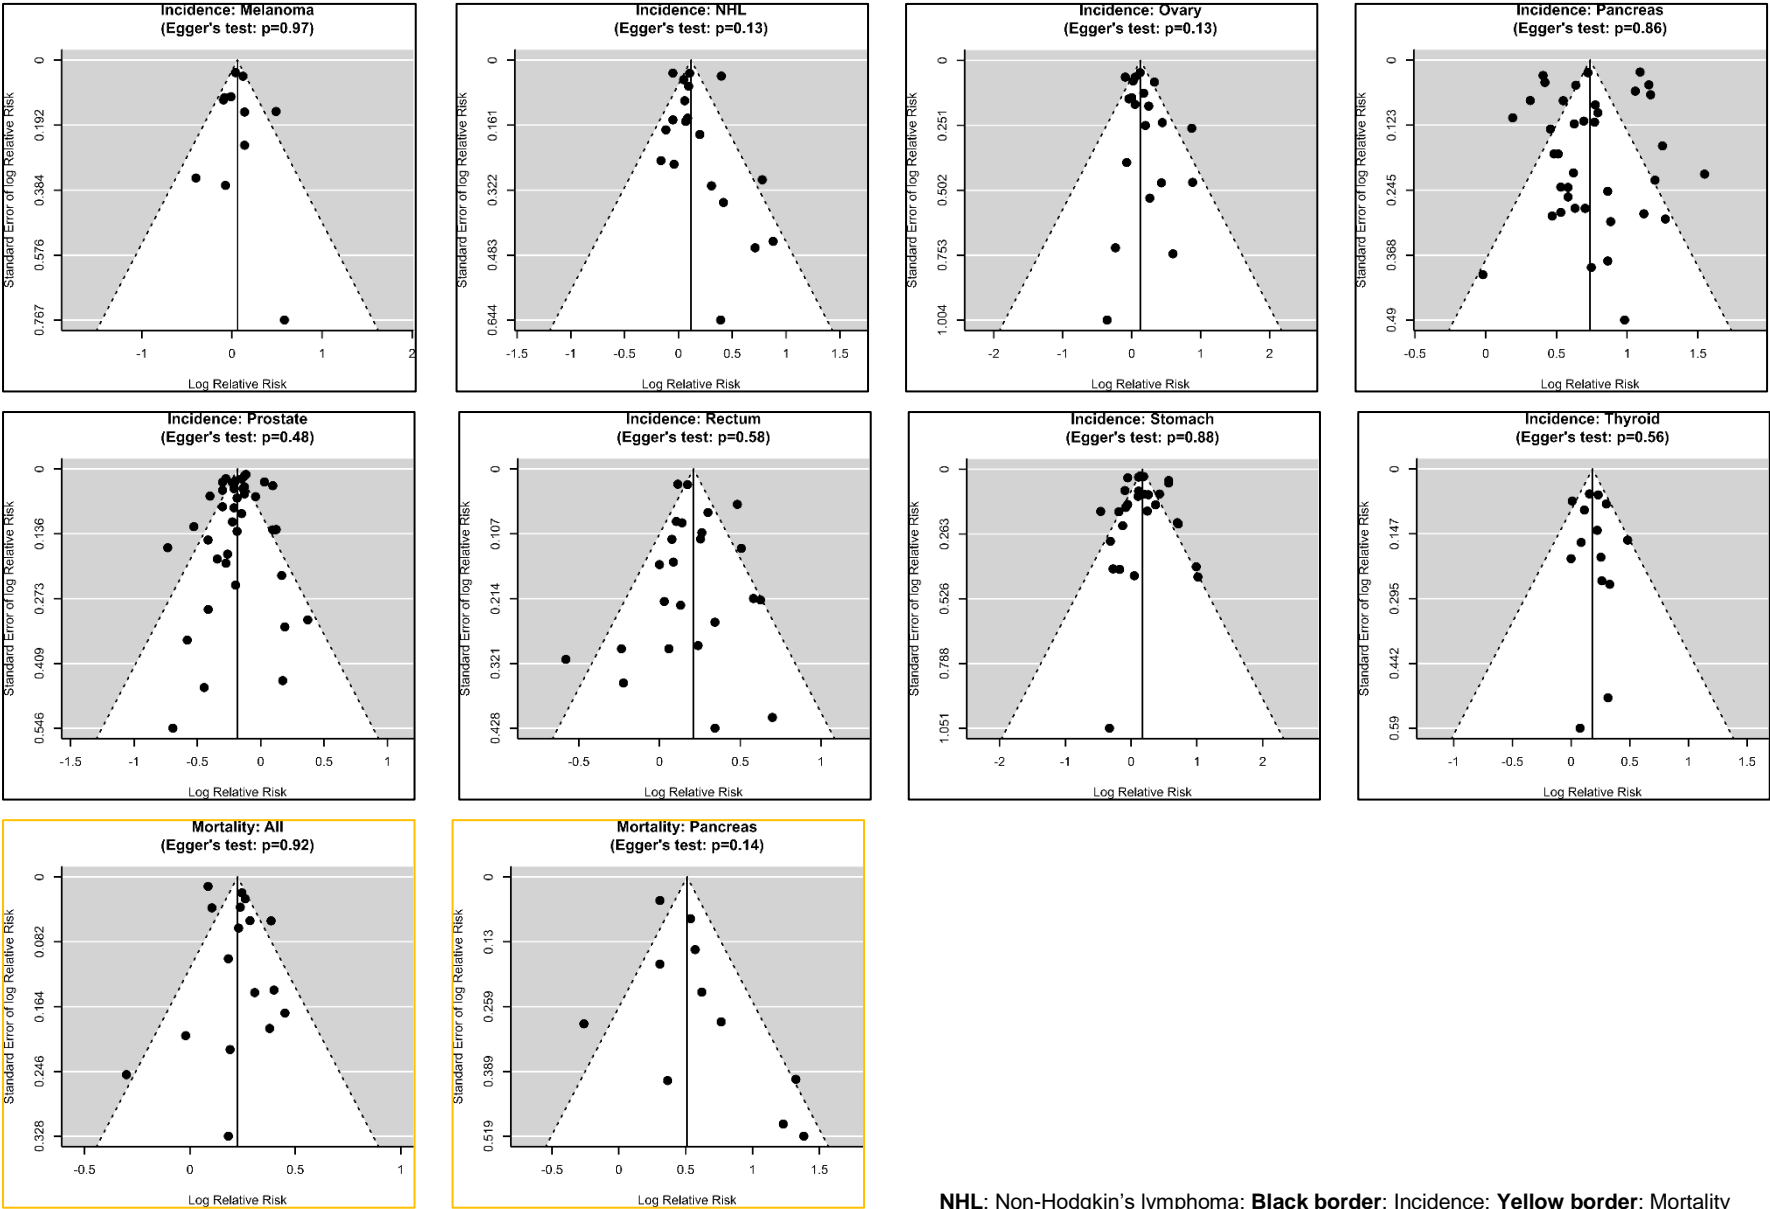

NHL: Non-Hodgkin's lymphoma; **Black border:** Incidence; **Yellow border:** Mortality

Figure S6a. Individual and overall estimates, by cancer and sex (Red – Females; Blue – Males)

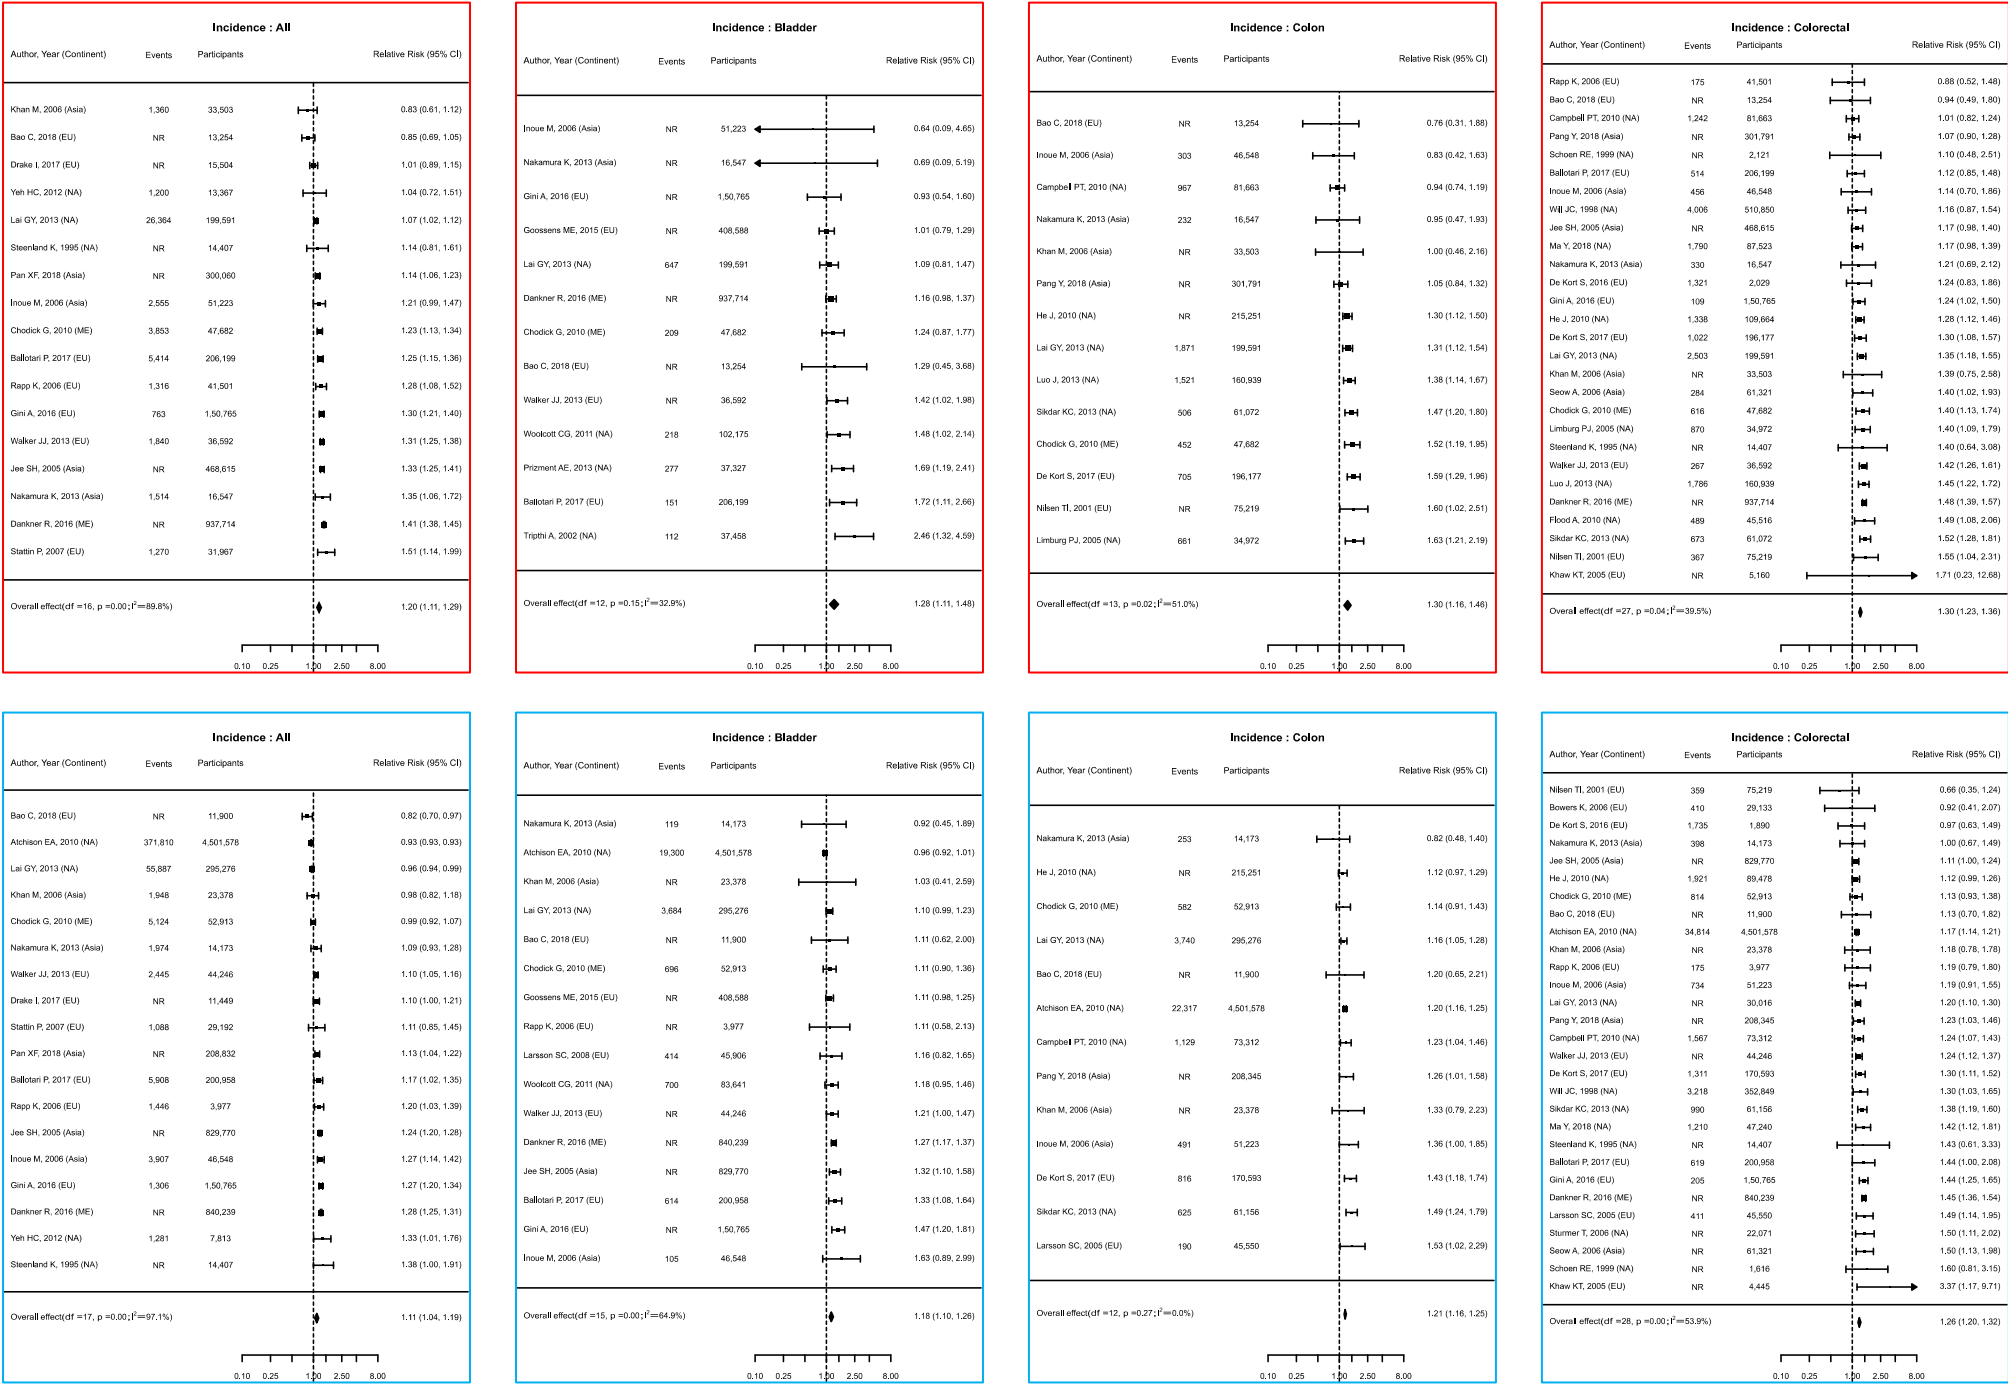

Figure S6b. Individual and overall estimates, by cancer and sex (Red – Females; Blue – Males)

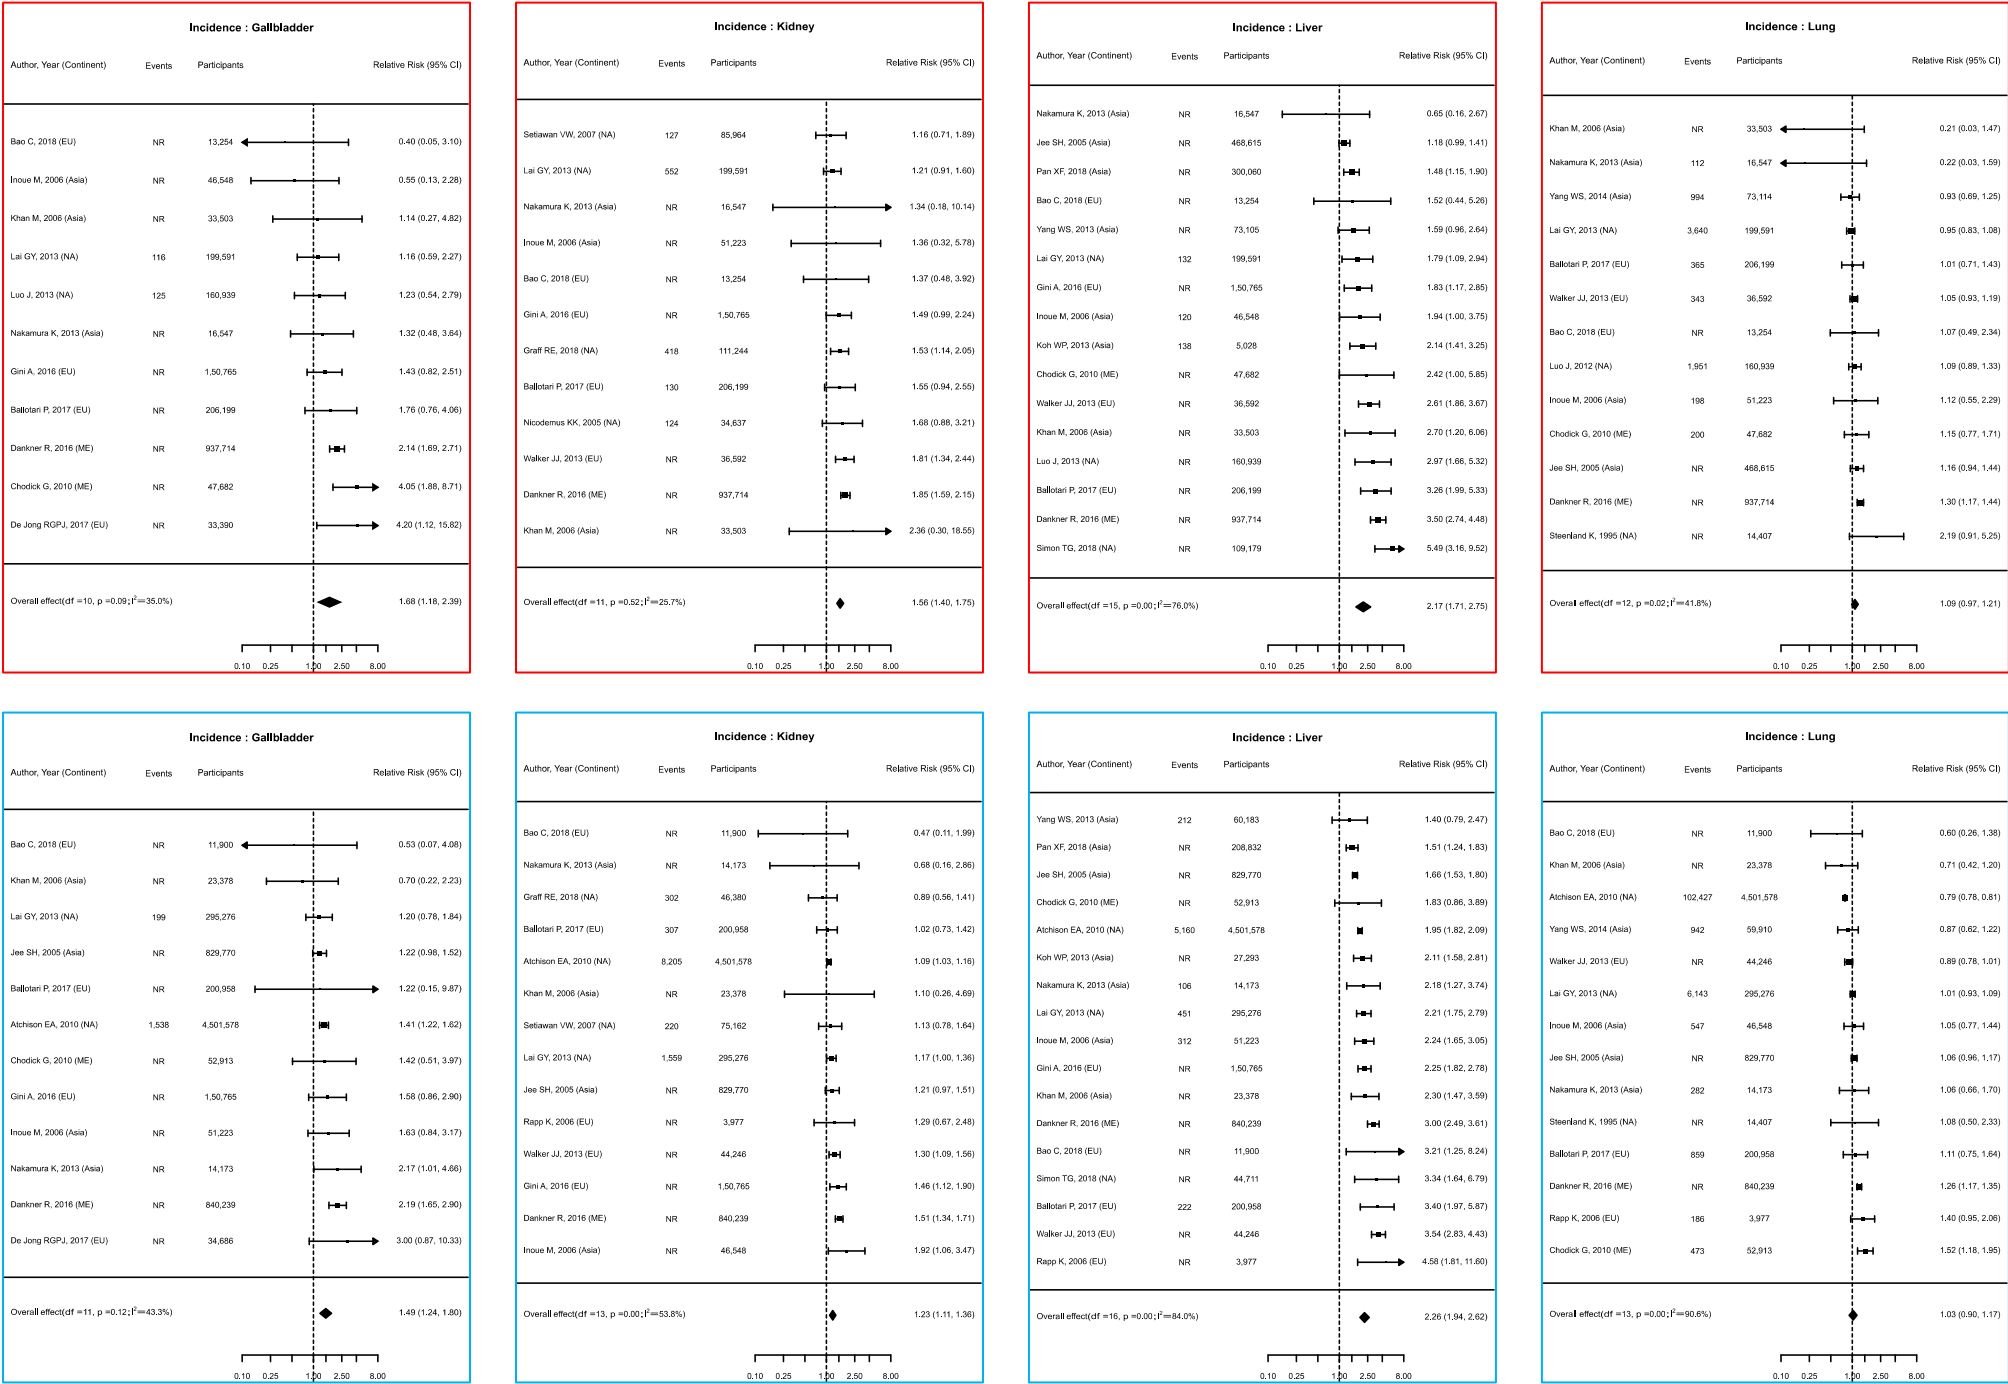



Figure S6c. Individual and overall estimates, by cancer and sex (Red – Females; Blue – Males)

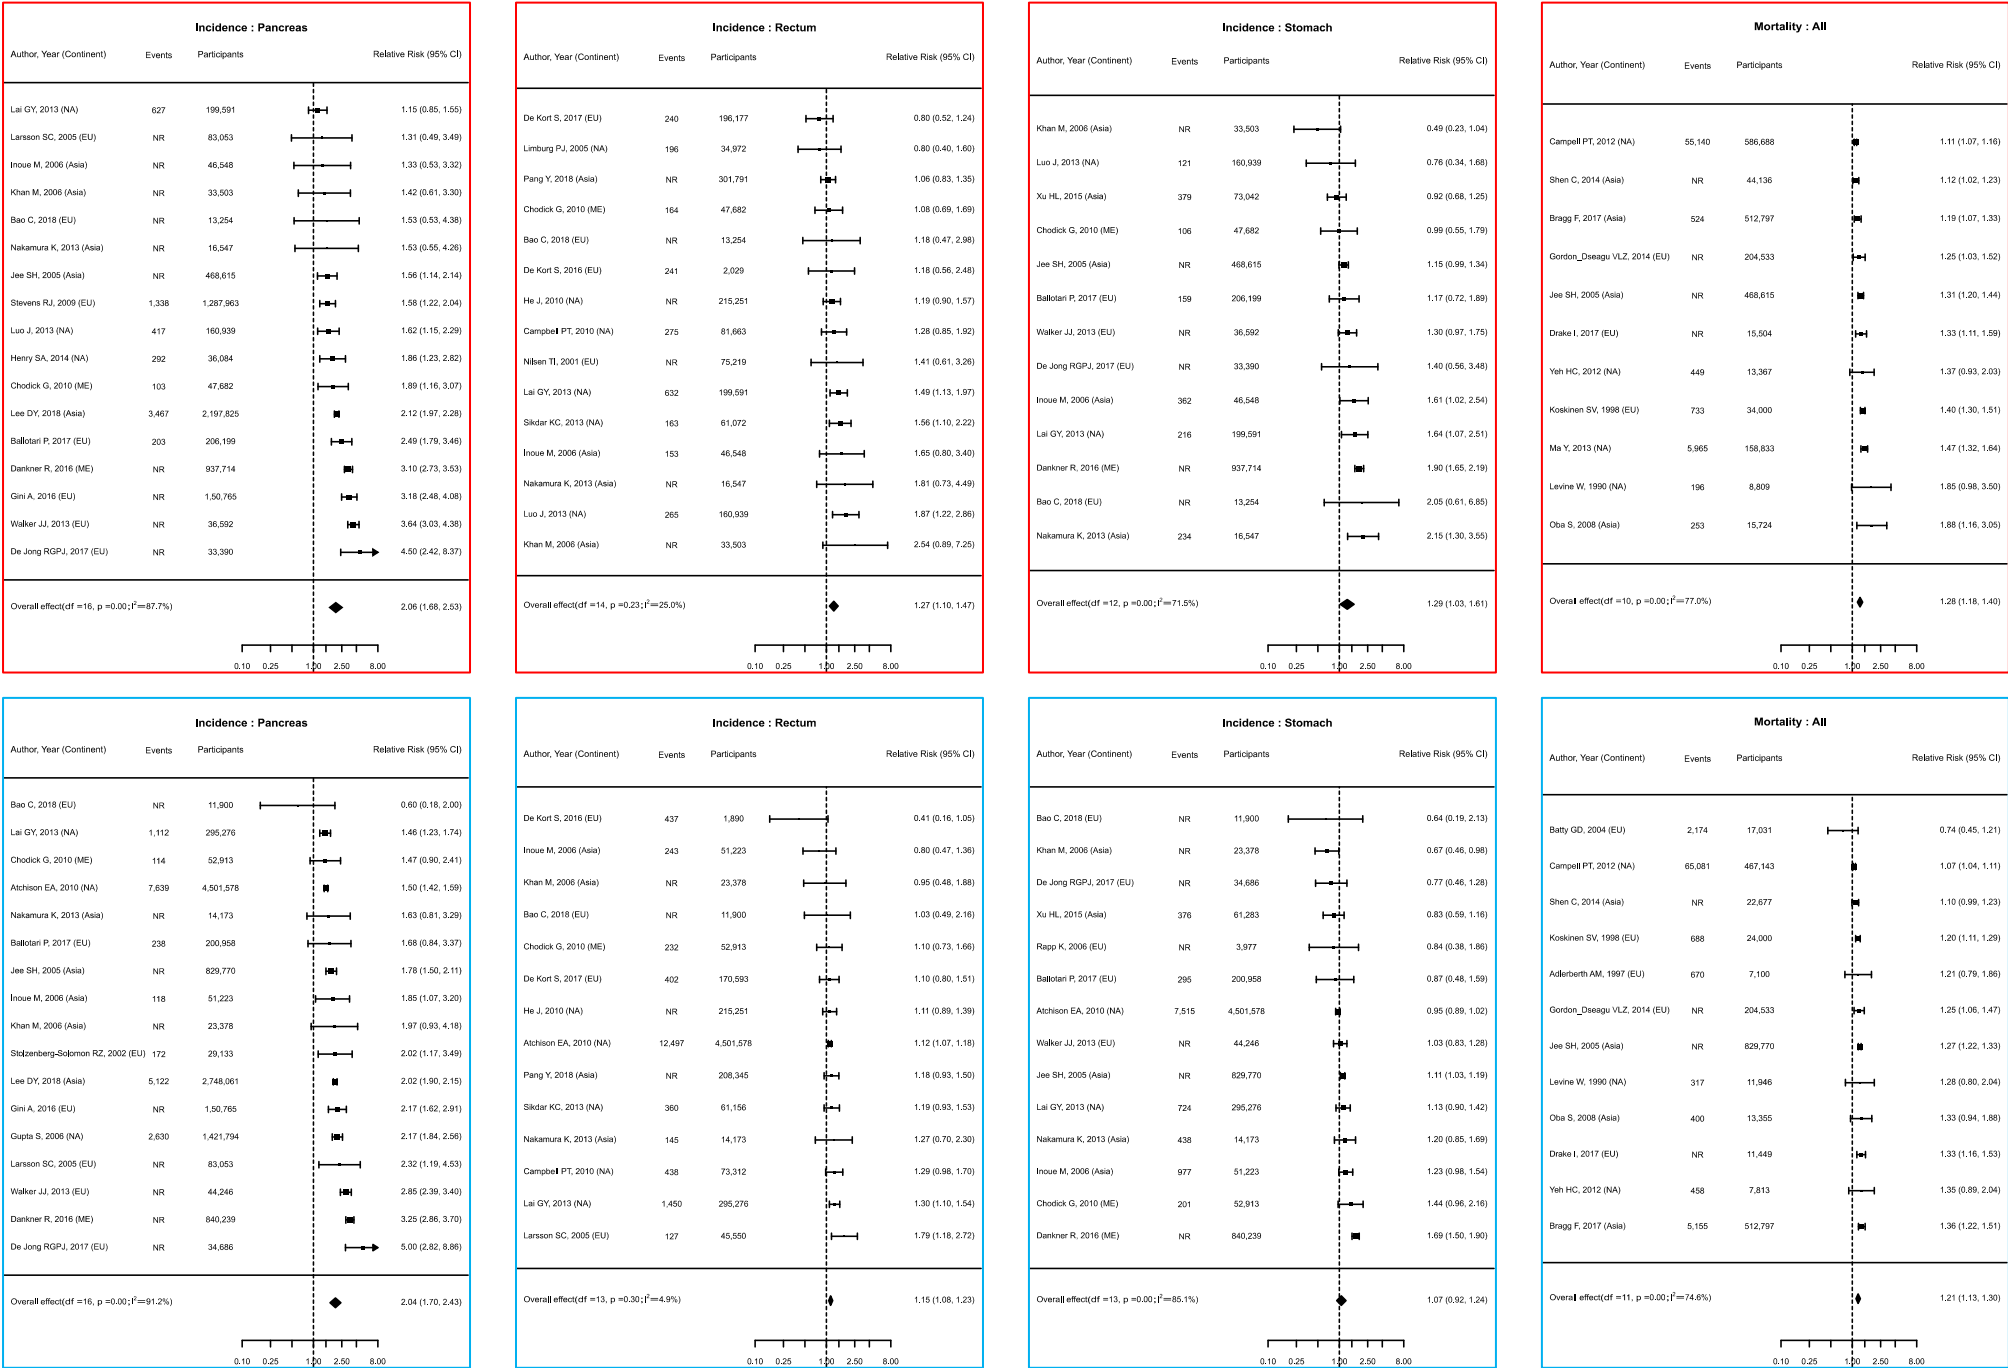

Figure S7a. Publication bias by cancer, Females

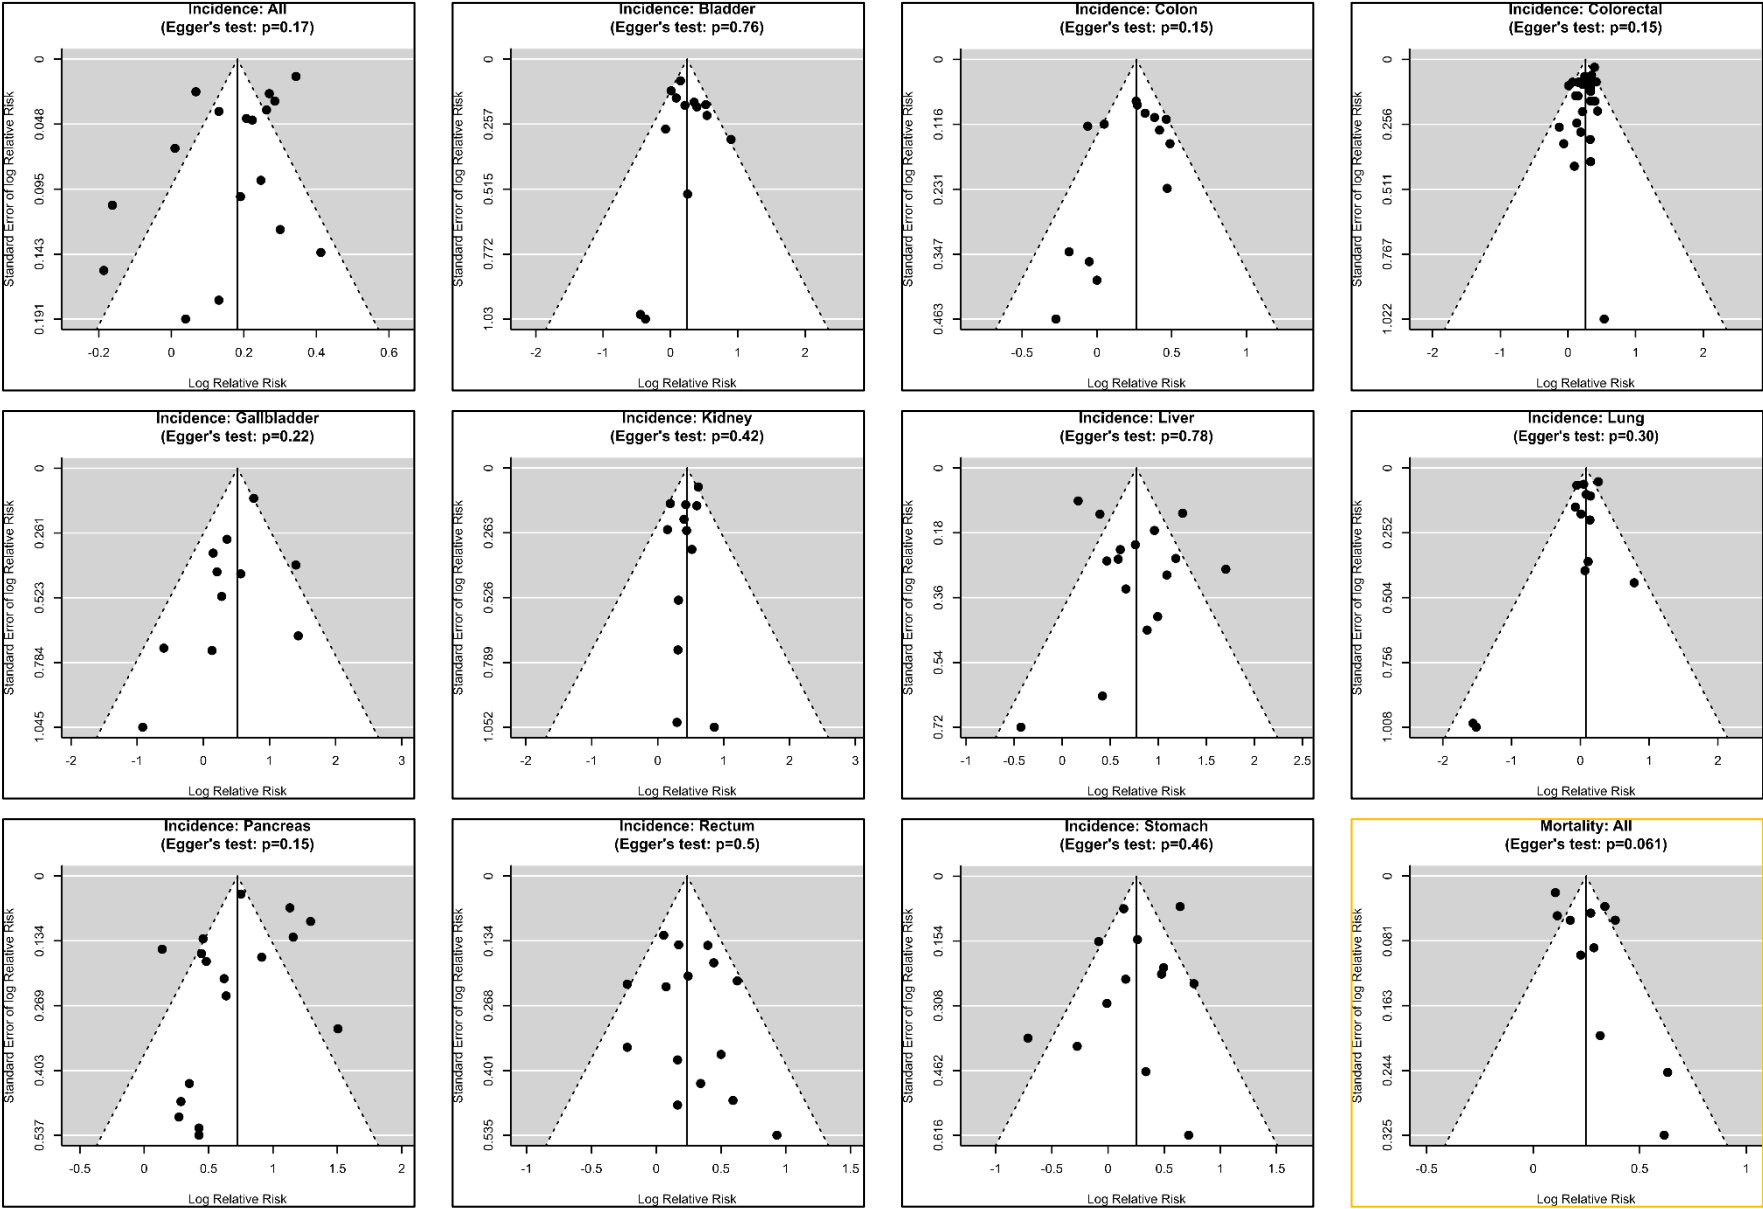

Black border: Incidence; Yellow border: Mortality

Figure S7b. Publication bias by cancer, Males

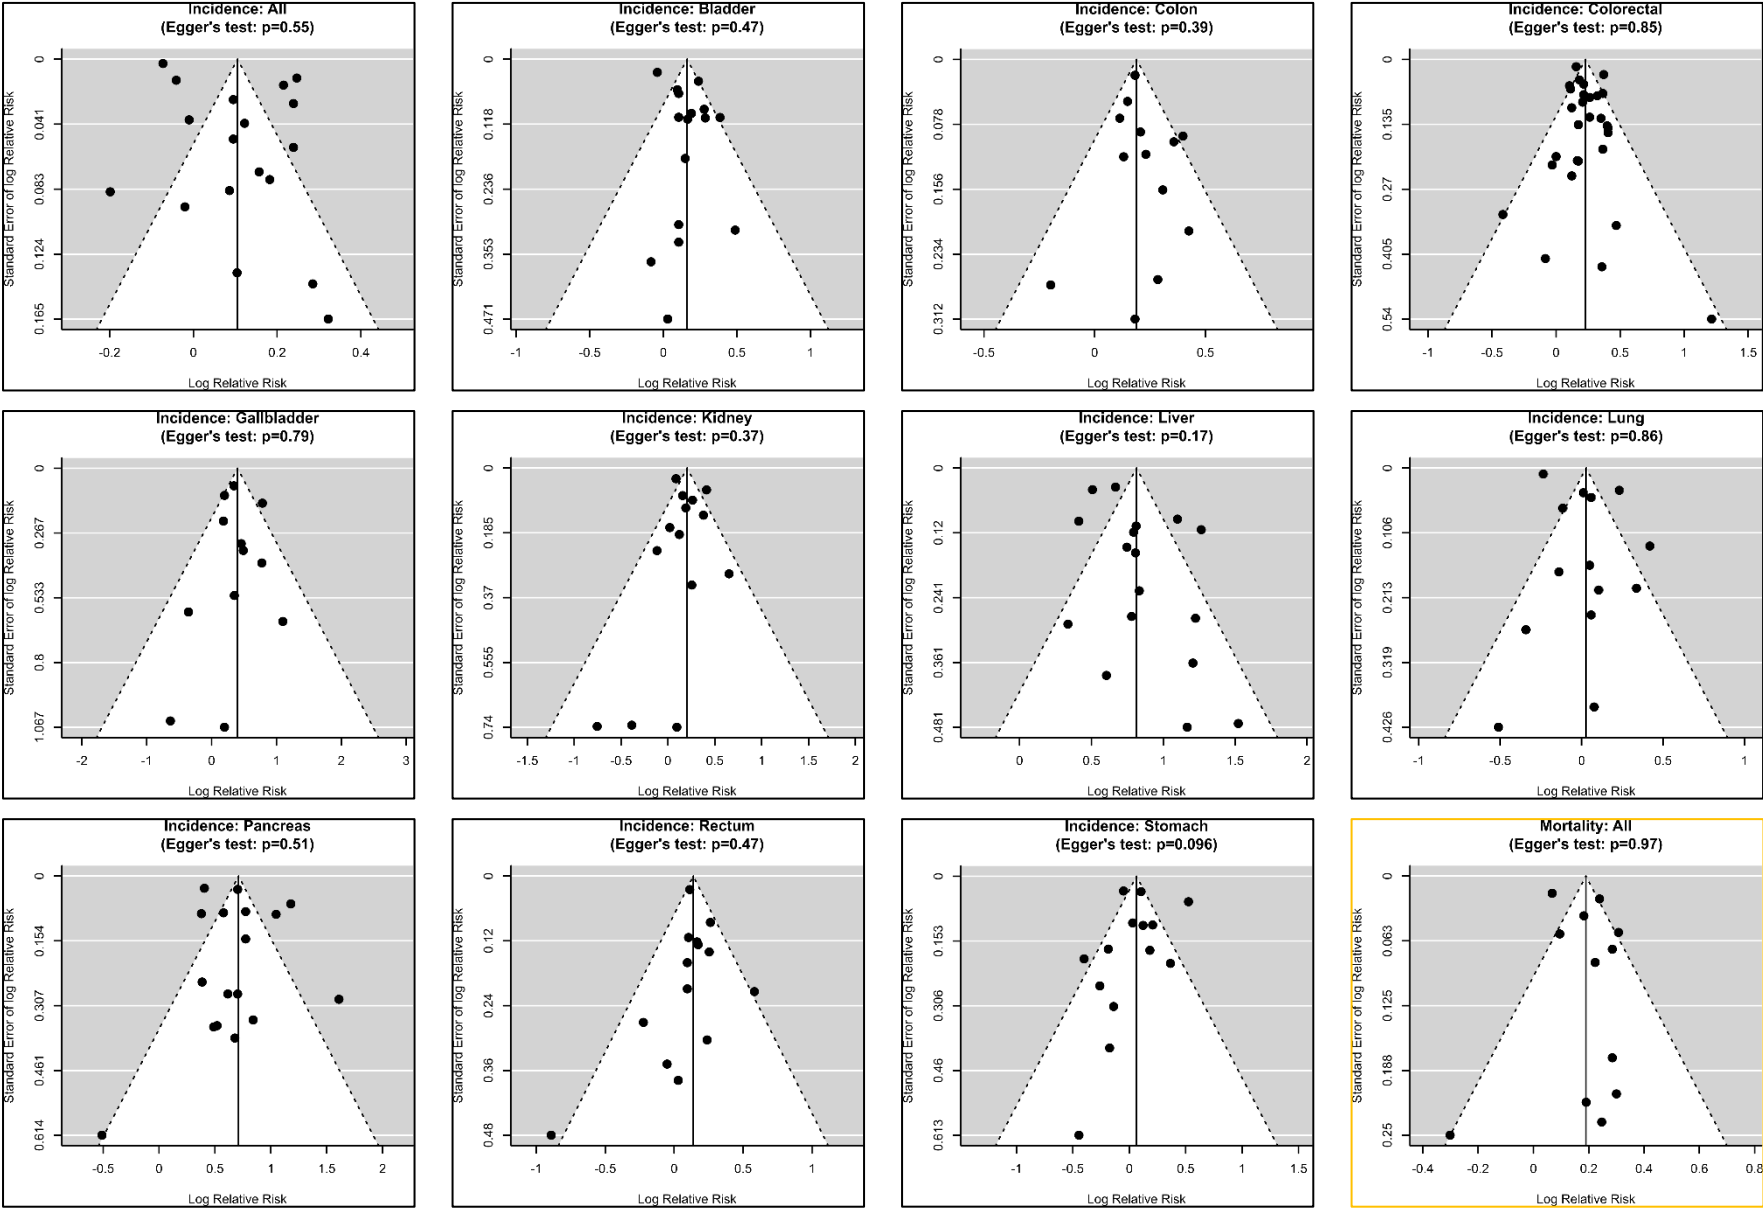

Black border: Incidence; Yellow border: Mortality

**Figure S8.** Proportions of studies with the true effect stronger than pre-specified relative risks in Females and Males

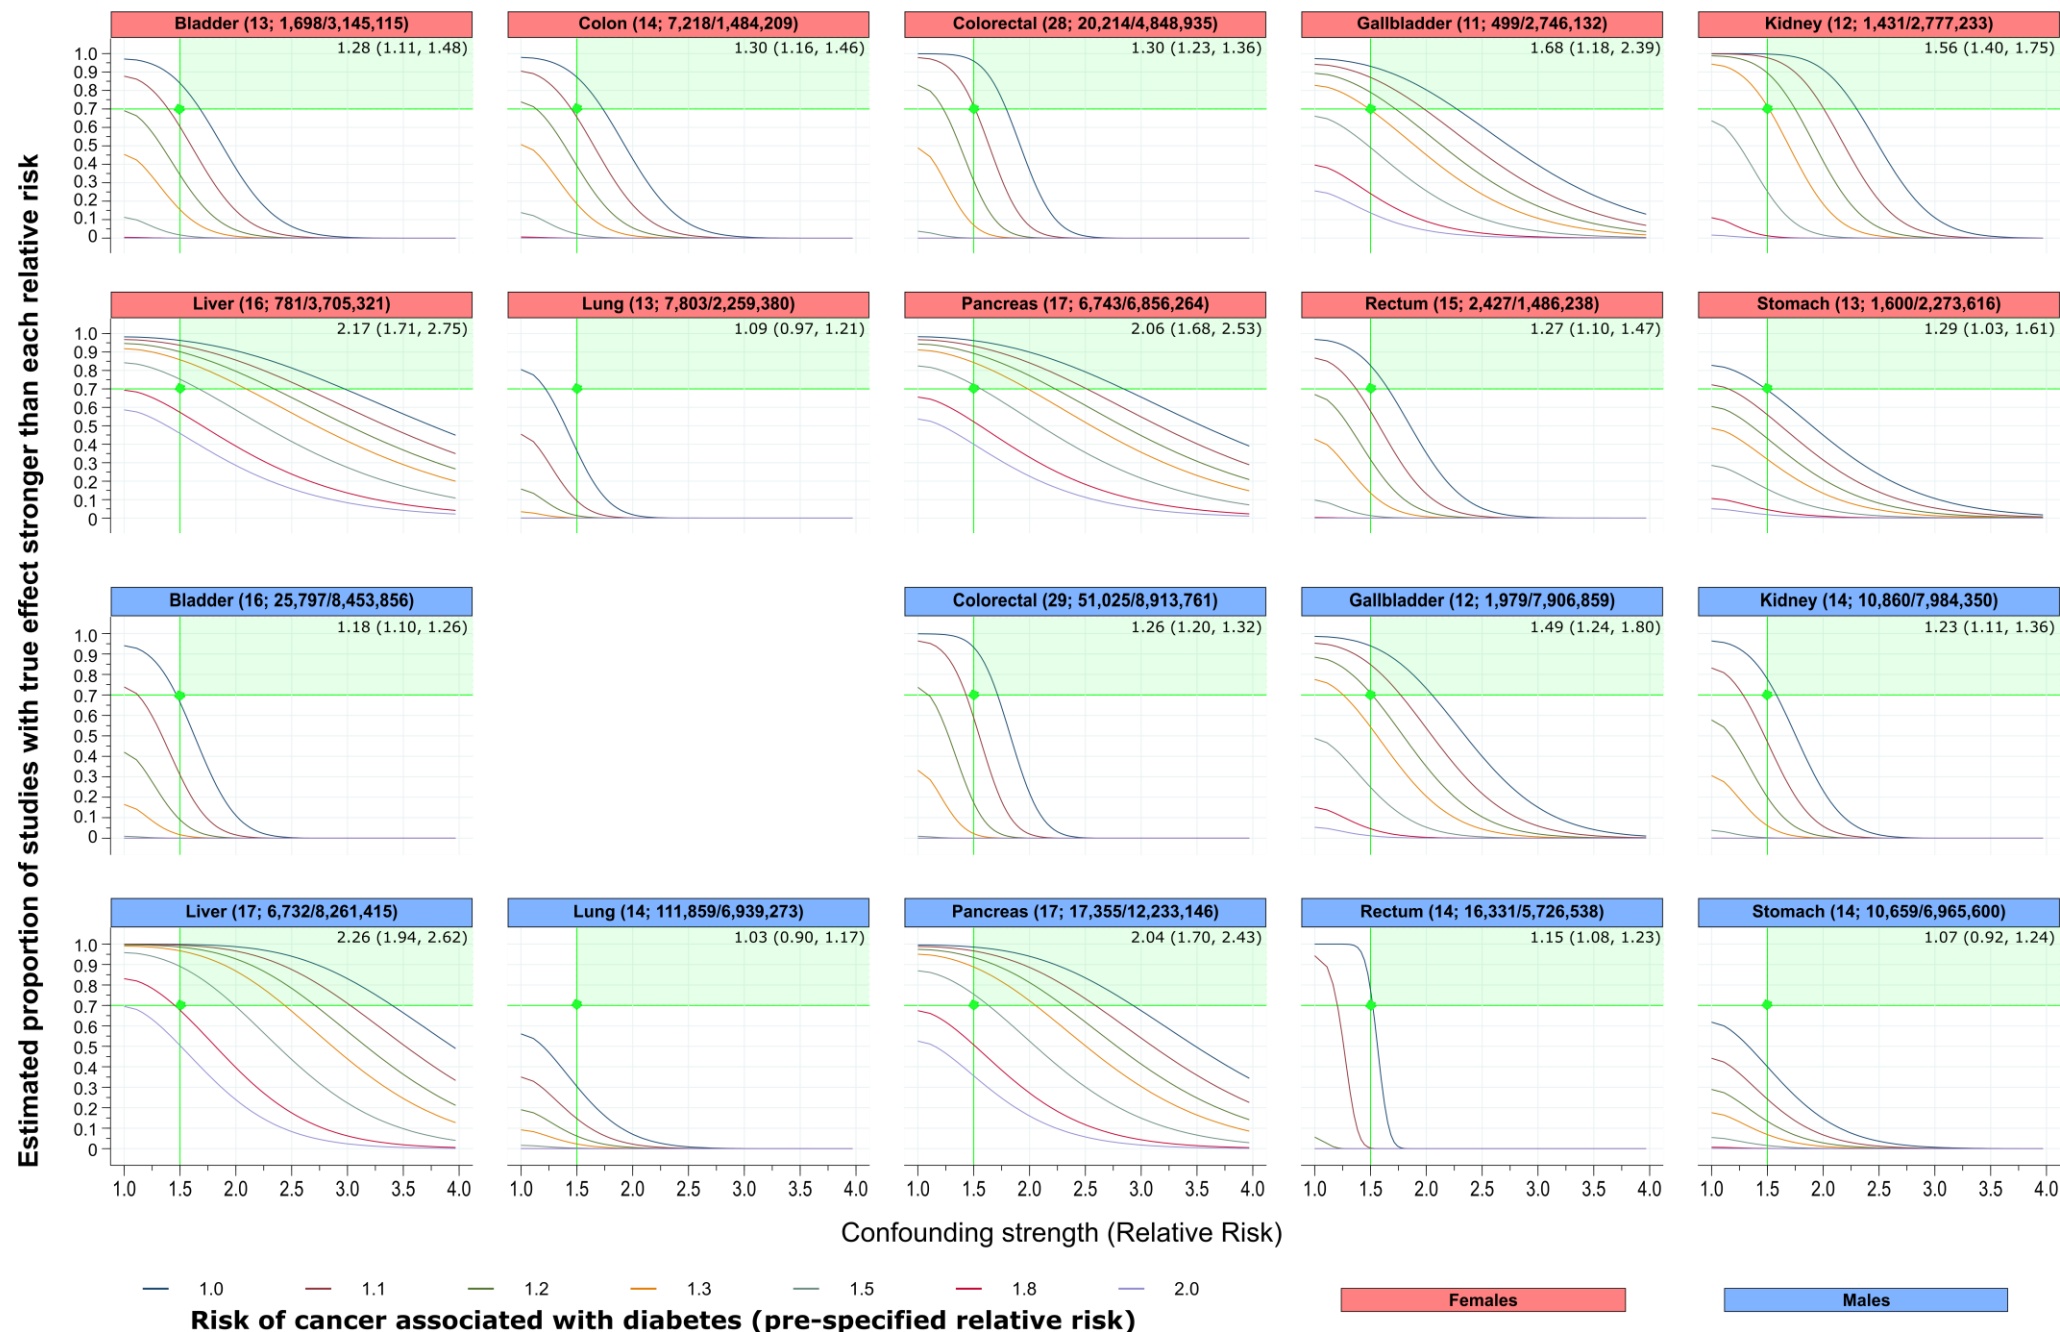

Within each panel is shown the pooled relative risk with 95% confidence interval derived from the random-effects meta-analysis. Bias analysis was not possible for colon cancer incidence in males as the heterogeneity in random-effects meta-analysis was zero; **X-axes:** Unmeasured confounding strength, associated with both diabetes and cancer, with a relative risk ranging from 1.0 to 4.0; **Y-axes:** proportions of studies with the true causal effect size stronger than each pre-specified relative risk for the association between diabetes and cancer: 1.0 to 2.0 for all outcomes (each **Line**); **Green area:** Association between T2D and cancer likely to be causal if proportion of studies with the true effect size is more than 70% and the unmeasured confounding needed to attenuate the effect is stronger than 1.5; the more are the lines in the right upper quadrant (green area), the more likely the association is causal.

**Figure S9a.** Unmeasured confounding and proportion of studies with true effect

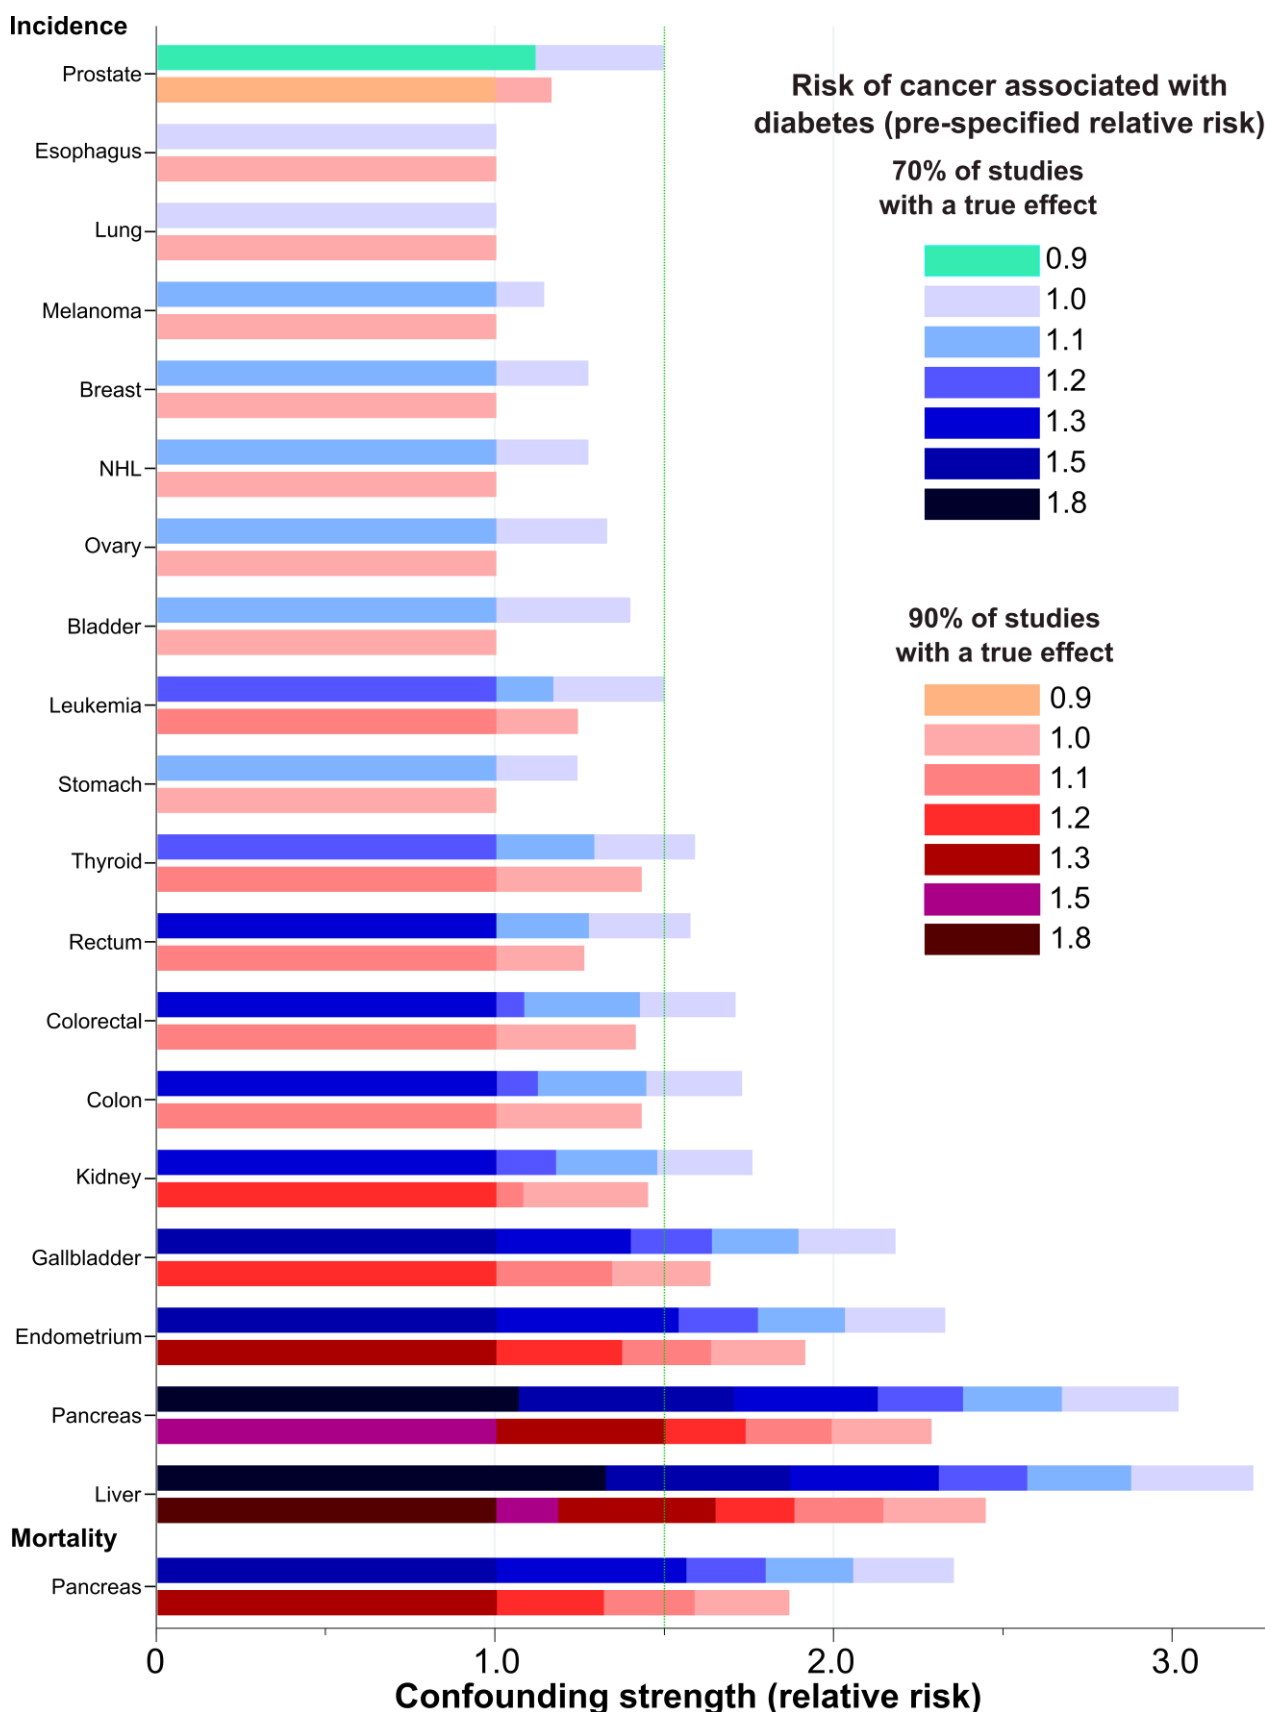

**NHL:** Non-Hodgkin's lymphoma; **X-axes:** Unmeasured confounding strength, associated with both diabetes and cancer (green grid line: 1.5); **Bars:** pre-specified relative risk for the associations between diabetes and cancer (blue: 70% of studies with a true effect; red: 90% of studies with a true effect). The longer the bar, the more likely the association is causal; the darker the colour, the stronger the true effect. For example, to reduce the proportion of studies with the true causal effect stronger than the relative risk of 1.8 (i.e., 80% increased risk in people with T2D comparing to those without) to a value lower than 70%, for liver cancer incidence (darkest blue), an unmeasured confounding of 1.32 is needed. Corresponding strengths of the unmeasured confounding to reduce the proportion lower than 70% for a true effect size stronger than the relative risk of 1.5, 1.3, 1.2, 1.1 and 1.0 were 1.9, 2.3, 2.6, 2.9 and 3.3, respectively.



**Figure S9b.** Unmeasured confounding and proportion of studies with true effect in females and males

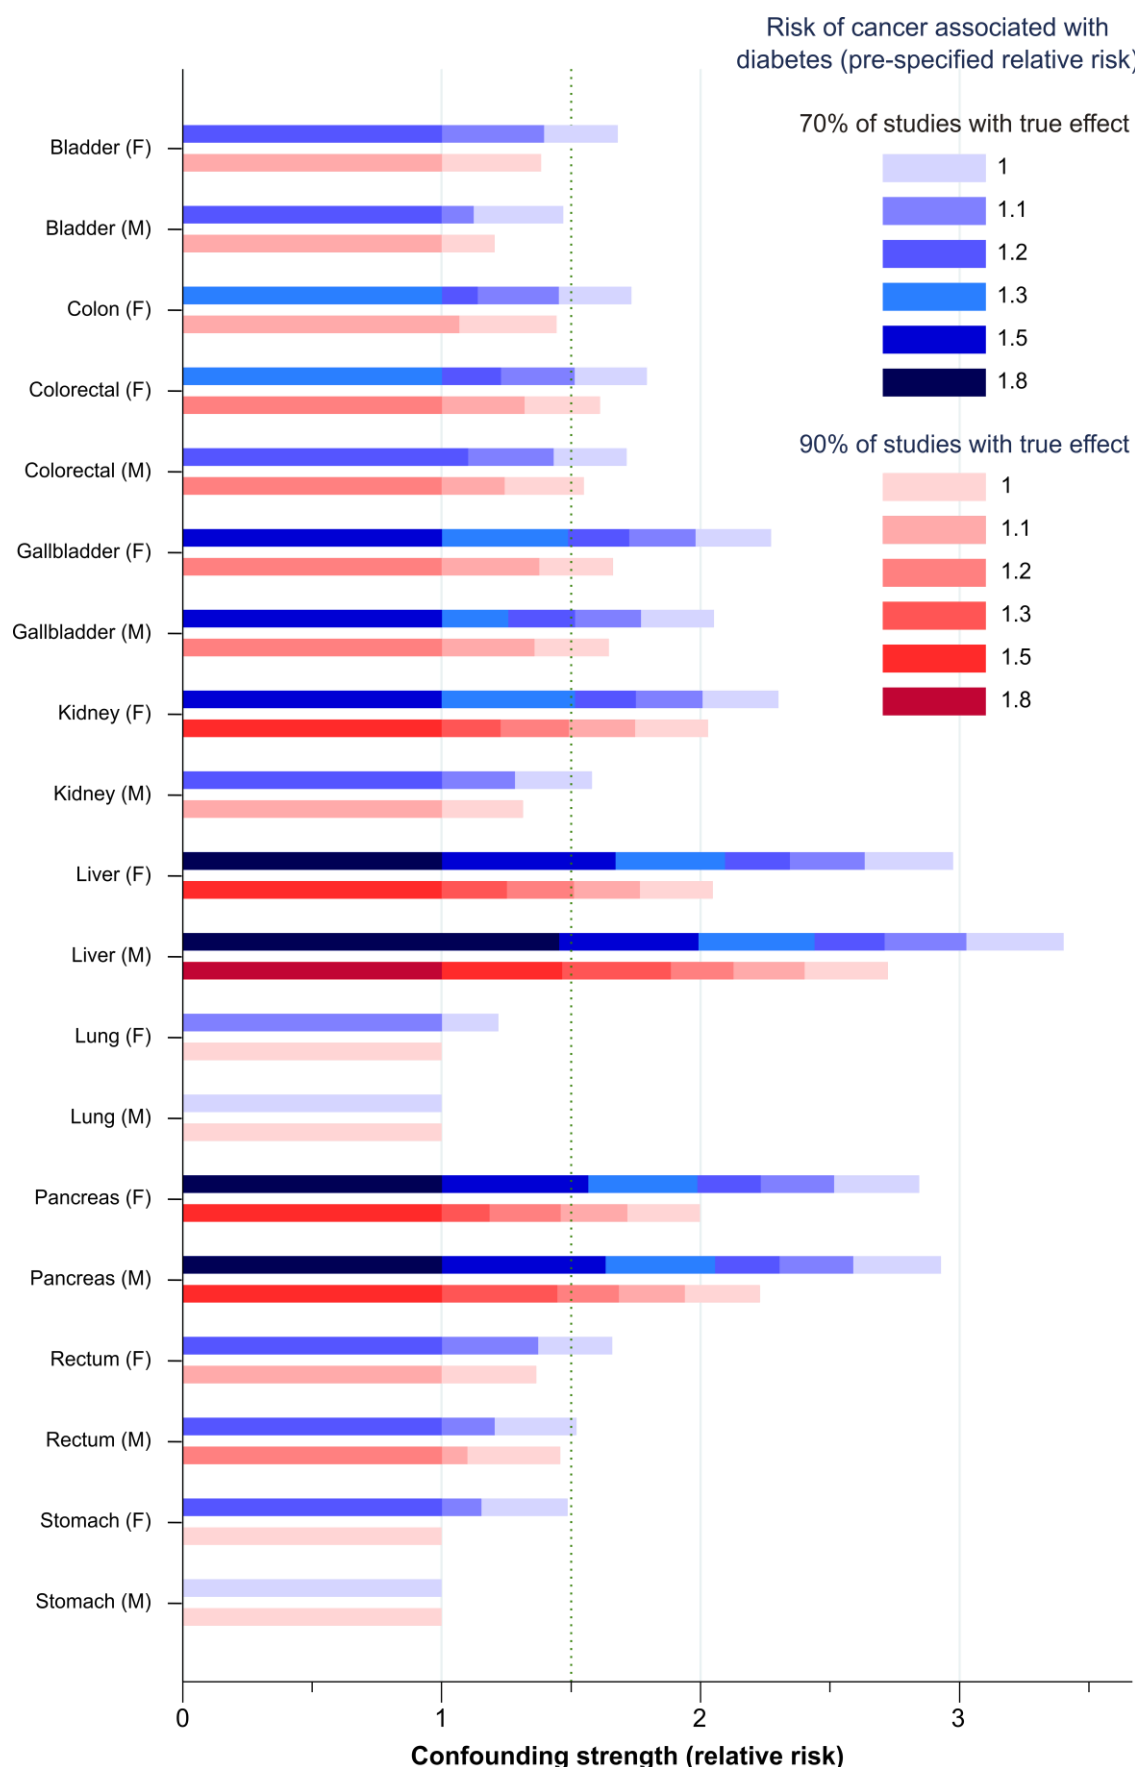

Bias analysis was not possible for colon cancer incidence in males as the heterogeneity in random-effects meta-analysis was zero; **X-axes:** Unmeasured confounding strength, associated with both diabetes and cancer; **Bars:** pre-specified threshold of relative risk for associations between diabetes and cancer; **blue:** assuming 70% of studies with a true effect; **red:** assuming 90% of studies with a true effect; **(F):** Females; **(M):** Males. The longer the bar, the more likely the association is causal; the darker the colour, the stronger the true effect. To reduce the proportion of studies lower than 70% for the true causal effect stronger than the relative risk of 1.8 for liver cancer incidence in Males [Liver (M) darkest blue], an unmeasured confounding of 1.45 is needed. Corresponding strengths of the unmeasured confounding for the pre-specified relative risk of 1.5, 1.3, 1.2, 1.1, and 1.0 were 2.0, 2.4, 2.7, 3.0 and 3.4, respectively.

## References of the 144 included studies (151 cohorts)

1. Levine W, Dyer AR, Shekelle RB, Schoenberger JA, Stamler J. Post-load plasma glucose and cancer mortality in middle-aged men and women. 12-year follow-up findings of the Chicago Heart Association Detection Project in Industry. *Am J Epidemiol* 1990; **131**(2): 254-62.
2. Thompson MM, Garland C, Barrett-Connor E, Khaw KT, Friedlander NJ, Wingard DL. Heart disease risk factors, diabetes, and prostatic cancer in an adult community. *Am J Epidemiol* 1989; **129**(3): 511-7.
3. Mills PK, Beeson WL, Abbey DE, Fraser GE, Phillips RL. Dietary habits and past medical history as related to fatal pancreas cancer risk among Adventists. *Cancer* 1988; **61**(12): 2578-85.
4. Shibata A, Mack TM, Paganini-Hill A, Ross RK, Henderson BE. A prospective study of pancreatic cancer in the elderly. *Int J Cancer* 1994; **58**(1): 46-9.
5. Sellers TA, Sprafka JM, Gapstur SM, et al. Does body fat distribution promote familial aggregation of adult onset diabetes mellitus and postmenopausal breast cancer? *Epidemiology* 1994; **5**(1): 102-8.
6. Friedman GD, van den Eeden SK. Risk factors for pancreatic cancer: an exploratory study. *Int J Epidemiol* 1993; **22**(1): 30-7.
7. Coughlin SS, Neaton JD, Sengupta A. Cigarette smoking as a predictor of death from prostate cancer in 348,874 men screened for the Multiple Risk Factor Intervention Trial. *Am J Epidemiol* 1996; **143**(10): 1002-6.
8. Steenland K, Nowlin S, Palu S. Cancer incidence in the National Health and Nutrition Survey I. Follow-up data: diabetes, cholesterol, pulse and physical activity. *Cancer Epidemiol Biomarkers Prev* 1995; **4**(8): 807-11.
9. Cerhan JR, Wallace RB, Folsom AR, et al. Medical history risk factors for non-Hodgkin's lymphoma in older women. *J Natl Cancer Inst* 1997; **89**(4): 314-8.
10. Adlerberth AM, Rosengren A, Wilhelmsen L. Diabetes and long-term risk of mortality from coronary and other causes in middle-aged Swedish men. A general population study. *Diabetes Care* 1998; **21**(4): 539-45.
11. Will JC, Galuska DA, Vinicor F, Calle EE. Colorectal cancer: another complication of diabetes mellitus? *Am J Epidemiol* 1998; **147**(9): 816-25.
12. Koskinen SV, Reunanen AR, Martelin TP, Valkonen T. Mortality in a large population-based cohort of patients with drug-treated diabetes mellitus. *Am J Public Health* 1998; **88**(5): 765-70.
13. Will JC, Vinicor F, Calle EE. Is diabetes mellitus associated with prostate cancer incidence and survival? *Epidemiology* 1999; **10**(3): 313-8.
14. Terry P, Baron JA, Weiderpass E, Yuen J, Lichtenstein P, Nyren O. Lifestyle and endometrial cancer risk: a cohort study from the Swedish Twin Registry. *Int J Cancer* 1999; **82**(1): 38-42.
15. Schoen RE, Tangen CM, Kuller LH, et al. Increased blood glucose and insulin, body size, and incident colorectal cancer. *J Natl Cancer Inst* 1999; **91**(13): 1147-54.
16. Gapstur SM, Gann PH, Lowe W, Liu K, Colangelo L, Dyer A. Abnormal glucose metabolism and pancreatic cancer mortality. *JAMA* 2000; **283**(19): 2552-8.
17. Nilsen TI, Vatten LJ. Prospective study of colorectal cancer risk and physical activity, diabetes, blood glucose and BMI: exploring the hyperinsulinaemia hypothesis. *Br J Cancer* 2001; **84**(3): 417-22.
18. Anderson KE, Anderson E, Mink PJ, et al. Diabetes and endometrial cancer in the Iowa women's health study. *Cancer Epidemiol Biomarkers Prev* 2001; **10**(6): 611-6.
19. Fujino Y, Mizoue T, Tokui N, Yoshimura T. Prospective study of diabetes mellitus and liver cancer in Japan. *Diabetes Metab Res Rev* 2001; **17**(5): 374-9.

20. Lin Y, Tamakoshi A, Kawamura T, et al. Risk of pancreatic cancer in relation to alcohol drinking, coffee consumption and medical history: findings from the Japan collaborative cohort study for evaluation of cancer risk. *Int J Cancer* 2002; **99**(5): 742-6.
21. Stolzenberg-Solomon RZ, Pietinen P, Taylor PR, Virtamo J, Albanes D. A prospective study of medical conditions, anthropometry, physical activity, and pancreatic cancer in male smokers (Finland). *Cancer Causes Control* 2002; **13**(5): 417-26.
22. Tripathi A, Folsom AR, Anderson KE, Iowa Women's Health S. Risk factors for urinary bladder carcinoma in postmenopausal women. The Iowa Women's Health Study. *Cancer* 2002; **95**(11): 2316-23.
23. Inoue M, Tajima K, Takezaki T, et al. Epidemiology of pancreatic cancer in Japan: a nested case-control study from the Hospital-based Epidemiologic Research Program at Aichi Cancer Center (HERPACC). *Int J Epidemiol* 2003; **32**(2): 257-62.
24. Michels KB, Solomon CG, Hu FB, et al. Type 2 diabetes and subsequent incidence of breast cancer in the Nurses' Health Study. *Diabetes Care* 2003; **26**(6): 1752-8.
25. Saydah SH. Abnormal Glucose Tolerance and the Risk of Cancer Death in the United States. *American Journal of Epidemiology* 2003; **157**(12): 1092-100.
26. Nicodemus KK, Sweeney C, Folsom AR. Evaluation of dietary, medical and lifestyle risk factors for incident kidney cancer in postmenopausal women. *Int J Cancer* 2004; **108**(1): 115-21.
27. Khaw KT, Wareham N, Bingham S, Luben R, Welch A, Day N. Preliminary communication: glycated hemoglobin, diabetes, and incident colorectal cancer in men and women: a prospective analysis from the European prospective investigation into cancer-Norfolk study. *Cancer Epidemiol Biomarkers Prev* 2004; **13**(6): 915-9.
28. Batty GD, Shipley MJ, Marmot M, Smith GD. Diabetes status and post-load plasma glucose concentration in relation to site-specific cancer mortality: findings from the original Whitehall study. *Cancer Causes Control* 2004; **15**(9): 873-81.
29. Rodriguez C, Patel AV, Mondul AM, Jacobs EJ, Thun MJ, Calle EE. Diabetes and risk of prostate cancer in a prospective cohort of US men. *Am J Epidemiol* 2005; **161**(2): 147-52.
30. Jee SH, Ohrr H, Sull JW, Yun JE, Ji M, Samet JM. Fasting serum glucose level and cancer risk in Korean men and women. *JAMA* 2005; **293**(2): 194-202.
31. Limburg PJ, Anderson KE, Johnson TW, et al. Diabetes mellitus and subsite-specific colorectal cancer risks in the Iowa Women's Health Study. *Cancer Epidemiol Biomarkers Prev* 2005; **14**(1): 133-7.
32. Hall GC, Roberts CM, Boulis M, Mo J, MacRae KD. Diabetes and the risk of lung cancer. *Diabetes Care* 2005; **28**(3): 590-4.
33. Larsson SC, Giovannucci E, Wolk A. Diabetes and colorectal cancer incidence in the cohort of Swedish men. *Diabetes Care* 2005; **28**(7): 1805-7.
34. Larsson SC, Permert J, Hakansson N, Naslund I, Bergkvist L, Wolk A. Overall obesity, abdominal adiposity, diabetes and cigarette smoking in relation to the risk of pancreatic cancer in two Swedish population-based cohorts. *Br J Cancer* 2005; **93**(11): 1310-5.
35. Seow A, Yuan JM, Koh WP, Lee HP, Yu MC. Diabetes mellitus and risk of colorectal cancer in the Singapore Chinese Health Study. *J Natl Cancer Inst* 2006; **98**(2): 135-8.
36. Rapp K, Schroeder J, Klenk J, et al. Fasting blood glucose and cancer risk in a cohort of more than 140,000 adults in Austria. *Diabetologia* 2006; **49**(5): 945-52.
37. Lai MS, Hsieh MS, Chiu YH, Chen TH. Type 2 diabetes and hepatocellular carcinoma: A cohort study in high prevalence area of hepatitis virus infection. *Hepatology* 2006; **43**(6): 1295-302.

38. Khan M, Mori M, Fujino Y, et al. Site-specific cancer risk due to diabetes mellitus history: evidence from the Japan Collaborative Cohort (JACC) Study. *Asian Pac J Cancer Prev* 2006; **7**(2): 253-9.
39. Bowers K, Albanes D, Limburg P, et al. A prospective study of anthropometric and clinical measurements associated with insulin resistance syndrome and colorectal cancer in male smokers. *Am J Epidemiol* 2006; **164**(7): 652-64.
40. Gupta S, Vittinghoff E, Bertenthal D, et al. New-onset diabetes and pancreatic cancer. *Clin Gastroenterol Hepatol* 2006; **4**(11): 1366-72; quiz 01.
41. Inoue M, Iwasaki M, Otani T, Sasazuki S, Noda M, Tsugane S. Diabetes mellitus and the risk of cancer: results from a large-scale population-based cohort study in Japan. *Arch Intern Med* 2006; **166**(17): 1871-7.
42. Velicer CM, Dublin S, White E. Diabetes and the risk of prostate cancer: the role of diabetes treatment and complications. *Prostate Cancer Prostatic Dis* 2007; **10**(1): 46-51.
43. Sturmer T, Buring JE, Lee IM, Gaziano JM, Glynn RJ. Metabolic abnormalities and risk for colorectal cancer in the physicians' health study. *Cancer Epidemiol Biomarkers Prev* 2006; **15**(12): 2391-7.
44. Friberg E, Mantzoros CS, Wolk A. Diabetes and risk of endometrial cancer: a population-based prospective cohort study. *Cancer Epidemiol Biomarkers Prev* 2007; **16**(2): 276-80.
45. Stattin P, Bjor O, Ferrari P, et al. Prospective study of hyperglycemia and cancer risk. *Diabetes Care* 2007; **30**(3): 561-7.
46. Setiawan VW, Stram DO, Nomura AM, Kolonel LN, Henderson BE. Risk factors for renal cell cancer: the multiethnic cohort. *Am J Epidemiol* 2007; **166**(8): 932-40.
47. Travier N, Jeffreys M, Brewer N, et al. Association between glycosylated hemoglobin and cancer risk: a New Zealand linkage study. *Ann Oncol* 2007; **18**(8): 1414-9.
48. Folsom AR, Pankow JS, Peacock JM, Bielinski SJ, Heiss G, Boerwinkle E. Variation in TCF7L2 and increased risk of colon cancer: the Atherosclerosis Risk in Communities (ARIC) Study. *Diabetes Care* 2008; **31**(5): 905-9.
49. Darbinian JA, Ferrara AM, Van Den Eeden SK, Quesenberry CP, Jr., Fireman B, Habel LA. Glycemic status and risk of prostate cancer. *Cancer Epidemiol Biomarkers Prev* 2008; **17**(3): 628-35.
50. Lindemann K, Vatten LJ, Ellstrom-Eng M, Eskild A. Body mass, diabetes and smoking, and endometrial cancer risk: a follow-up study. *Br J Cancer* 2008; **98**(9): 1582-5.
51. Khan AE, Gallo V, Linseisen J, et al. Diabetes and the risk of non-Hodgkin's lymphoma and multiple myeloma in the European Prospective Investigation into Cancer and Nutrition. *Haematologica* 2008; **93**(6): 842-50.
52. Chen CL, Yang HI, Yang WS, et al. Metabolic factors and risk of hepatocellular carcinoma by chronic hepatitis B/C infection: a follow-up study in Taiwan. *Gastroenterology* 2008; **135**(1): 111-21.
53. Larsson SC, Andersson SO, Johansson JE, Wolk A. Diabetes mellitus, body size and bladder cancer risk in a prospective study of Swedish men. *Eur J Cancer* 2008; **44**(17): 2655-60.
54. Oba S, Nagata C, Nakamura K, Takatsuka N, Shimizu H. Self-reported Diabetes Mellitus and Risk of Mortality from All Causes, Cardiovascular Disease, and Cancer in Takayama: A Population-based Prospective Cohort Study in Japan. *Journal of Epidemiology* 2008; **18**(5): 197-203.
55. Kasper JS, Liu Y, Giovannucci E. Diabetes mellitus and risk of prostate cancer in the health professionals follow-up study. *Int J Cancer* 2009; **124**(6): 1398-403.
56. Stevens RJ, Roddam AW, Spencer EA, et al. Factors associated with incident and fatal pancreatic cancer in a cohort of middle-aged women. *Int J Cancer* 2009; **124**(10): 2400-5.

57. Ikeda F, Doi Y, Yonemoto K, et al. Hyperglycemia increases risk of gastric cancer posed by *Helicobacter pylori* infection: a population-based cohort study. *Gastroenterology* 2009; **136**(4): 1234-41.
58. Waters KM, Henderson BE, Stram DO, Wan P, Kolonel LN, Haiman CA. Association of diabetes with prostate cancer risk in the multiethnic cohort. *Am J Epidemiol* 2009; **169**(8): 937-45.
59. Martin RM, Vatten L, Gunnell D, Romundstad P, Nilsen TI. Components of the metabolic syndrome and risk of prostate cancer: the HUNT 2 cohort, Norway. *Cancer Causes Control* 2009; **20**(7): 1181-92.
60. Wallstrom P, Bjartell A, Gullberg B, Olsson H, Wirfalt E. A prospective Swedish study on body size, body composition, diabetes, and prostate cancer risk. *Br J Cancer* 2009; **100**(11): 1799-805.
61. Erber E, Lim U, Maskarinec G, Kolonel LN. Common immune-related risk factors and incident non-Hodgkin lymphoma: the multiethnic cohort. *Int J Cancer* 2009; **125**(6): 1440-5.
62. Ogunleye AA, Ogston SA, Morris AD, Evans JM. A cohort study of the risk of cancer associated with type 2 diabetes. *Br J Cancer* 2009; **101**(7): 1199-201.
63. Ulcickas Yood M, Oliveria SA, Campbell UB, Koro CE. Incidence of cancer in a population-based cohort of patients with type 2 diabetes. *Diabetes & Metabolic Syndrome: Clinical Research & Reviews* 2009; **3**(1): 12-6.
64. Ehrlich SF, Quesenberry CP, Jr., Van Den Eeden SK, Shan J, Ferrara A. Patients diagnosed with diabetes are at increased risk for asthma, chronic obstructive pulmonary disease, pulmonary fibrosis, and pneumonia but not lung cancer. *Diabetes Care* 2010; **33**(1): 55-60.
65. Meinhold CL, Ron E, Schonfeld SJ, et al. Nonradiation risk factors for thyroid cancer in the US Radiologic Technologists Study. *Am J Epidemiol* 2010; **171**(2): 242-52.
66. Chodick G, Heymann AD, Rosenmann L, et al. Diabetes and risk of incident cancer: a large population-based cohort study in Israel. *Cancer Causes Control* 2010; **21**(6): 879-87.
67. Li Q, Kuriyama S, Kakizaki M, et al. History of diabetes mellitus and the risk of prostate cancer: the Ohsaki Cohort Study. *Cancer Causes Control* 2010; **21**(7): 1025-32.
68. Flood A, Strayer L, Schairer C, Schatzkin A. Diabetes and risk of incident colorectal cancer in a prospective cohort of women. *Cancer Causes Control* 2010; **21**(8): 1277-84.
69. Atchison EA, Gridley G, Carreon JD, Leitzmann MF, McGlynn KA. Risk of cancer in a large cohort of U.S. veterans with diabetes. *Int J Cancer* 2011; **128**(3): 635-43.
70. He J, Stram DO, Kolonel LN, Henderson BE, Le Marchand L, Haiman CA. The association of diabetes with colorectal cancer risk: the Multiethnic Cohort. *Br J Cancer* 2010; **103**(1): 120-6.
71. Campbell PT, Deka A, Jacobs EJ, et al. Prospective study reveals associations between colorectal cancer and type 2 diabetes mellitus or insulin use in men. *Gastroenterology* 2010; **139**(4): 1138-46.
72. Wotton CJ, Yeates DG, Goldacre MJ. Cancer in patients admitted to hospital with diabetes mellitus aged 30 years and over: record linkage studies. *Diabetologia* 2011; **54**(3): 527-34.
73. Woolcott CG, Maskarinec G, Haiman CA, Henderson BE, Kolonel LN. Diabetes and urothelial cancer risk: the Multiethnic Cohort study. *Cancer Epidemiol* 2011; **35**(6): 551-4.
74. Lambe M, Wigertz A, Garmo H, Walldius G, Jungner I, Hammar N. Impaired glucose metabolism and diabetes and the risk of breast, endometrial, and ovarian cancer. *Cancer Causes Control* 2011; **22**(8): 1163-71.
75. Johnson JA, Bowker SL, Richardson K, Marra CA. Time-varying incidence of cancer after the onset of type 2 diabetes: evidence of potential detection bias. *Diabetologia* 2011; **54**(9): 2263-71.
76. Aschebrook-Kilfoy B, Sabra MM, Brenner A, et al. Diabetes and thyroid cancer risk in the National Institutes of Health-AARP Diet and Health Study. *Thyroid* 2011; **21**(9): 957-63.

77. Grote VA, Rohrmann S, Nieters A, et al. Diabetes mellitus, glycated haemoglobin and C-peptide levels in relation to pancreatic cancer risk: a study within the European Prospective Investigation into Cancer and Nutrition (EPIC) cohort. *Diabetologia* 2011; **54**(12): 3037-46.
78. Yeh HC, Platz EA, Wang NY, Visvanathan K, Helzlsouer KJ, Brancati FL. A prospective study of the associations between treated diabetes and cancer outcomes. *Diabetes Care* 2012; **35**(1): 113-8.
79. Attner B, Landin-Olsson M, Lithman T, Noreen D, Olsson H. Cancer among patients with diabetes, obesity and abnormal blood lipids: a population-based register study in Sweden. *Cancer Causes Control* 2012; **23**(5): 769-77.
80. Lo SF, Chang SN, Muo CH, et al. Modest increase in risk of specific types of cancer types in type 2 diabetes mellitus patients. *Int J Cancer* 2013; **132**(1): 182-8.
81. Luo J, Chlebowski R, Wactawski-Wende J, Schlecht NF, Tinker L, Margolis KL. Diabetes and lung cancer among postmenopausal women. *Diabetes Care* 2012; **35**(7): 1485-91.
82. Luo J, Chlebowski R, Liu S, et al. Diabetes mellitus as a risk factor for gastrointestinal cancers among postmenopausal women. *Cancer Causes Control* 2013; **24**(3): 577-85.
83. Campbell PT, Newton CC, Patel AV, Jacobs EJ, Gapstur SM. Diabetes and cause-specific mortality in a prospective cohort of one million U.S. adults. *Diabetes Care* 2012; **35**(9): 1835-44.
84. Gapstur SM, Patel AV, Diver WR, et al. Type II diabetes mellitus and the incidence of epithelial ovarian cancer in the cancer prevention study-II nutrition cohort. *Cancer Epidemiol Biomarkers Prev* 2012; **21**(11): 2000-5.
85. Newton CC, Gapstur SM, Campbell PT, Jacobs EJ. Type 2 diabetes mellitus, insulin-use and risk of bladder cancer in a large cohort study. *Int J Cancer* 2013; **132**(9): 2186-91.
86. Prizment AE, Anderson KE, Yuan JM, Folsom AR. Diabetes and risk of bladder cancer among postmenopausal women in the Iowa Women's Health Study. *Cancer Causes Control* 2013; **24**(3): 603-8.
87. Koh WP, Wang R, Jin A, Yu MC, Yuan JM. Diabetes mellitus and risk of hepatocellular carcinoma: findings from the Singapore Chinese Health Study. *Br J Cancer* 2013; **108**(5): 1182-8.
88. Yang WS, Shu XO, Gao J, et al. Prospective evaluation of type 2 diabetes mellitus on the risk of primary liver cancer in Chinese men and women. *Ann Oncol* 2013; **24**(6): 1679-85.
89. Lai GY, Park Y, Hartge P, Hollenbeck AR, Freedman ND. The association between self-reported diabetes and cancer incidence in the NIH-AARP Diet and Health Study. *J Clin Endocrinol Metab* 2013; **98**(3): E497-502.
90. Onitilo AA, Stankowski RV, Berg RL, et al. Breast cancer incidence before and after diagnosis of type 2 diabetes mellitus in women: increased risk in the prediabetes phase. *Eur J Cancer Prev* 2014; **23**(2): 76-83.
91. Sikdar KC, Walsh SJ, Roche M, Jiang Y, Syrowatka A, Collins KD. Diabetes and sex-specific colorectal cancer risks in Newfoundland and Labrador: a population-based retrospective cohort study. *Can J Public Health* 2013; **104**(2): e101-7.
92. Walker JJ, Brewster DH, Colhoun HM, et al. Type 2 diabetes, socioeconomic status and risk of cancer in Scotland 2001-2007. *Diabetologia* 2013; **56**(8): 1712-5.
93. Henry SA, Prizment AE, Anderson KE. Duration of diabetes and pancreatic cancer in a case-control study in the Midwest and the Iowa Women's Health Study (IWHS) cohort. *JOP* 2013; **14**(3): 243-9.
94. Schlesinger S, Aleksandrova K, Pischon T, et al. Diabetes mellitus, insulin treatment, diabetes duration, and risk of biliary tract cancer and hepatocellular carcinoma in a European cohort. *Ann Oncol* 2013; **24**(9): 2449-55.
95. Nakamura K, Wada K, Tamai Y, et al. Diabetes mellitus and risk of cancer in Takayama: a population-based prospective cohort study in Japan. *Cancer Sci* 2013; **104**(10): 1362-7.



96. Colmers IN, Majumdar SR, Yasui Y, Bowker SL, Marra CA, Johnson JA. Detection bias and overestimation of bladder cancer risk in type 2 diabetes: a matched cohort study. *Diabetes Care* 2013; **36**(10): 3070-5.
97. Ma Y, Hebert JR, Balasubramanian R, et al. All-cause, cardiovascular, and cancer mortality rates in postmenopausal white, black, Hispanic, and Asian women with and without diabetes in the United States: the Women's Health Initiative, 1993-2009. *Am J Epidemiol* 2013; **178**(10): 1533-41.
98. Eijgenraam P, Heinen MM, Verhage BA, Keulemans YC, Schouten LJ, van den Brandt PA. Diabetes type II, other medical conditions and pancreatic cancer risk: a prospective study in The Netherlands. *Br J Cancer* 2013; **109**(11): 2924-32.
99. Shen C, Schooling CM, Chan WM, Lee SY, Leung GM, Lam TH. Self-reported diabetes and mortality in a prospective Chinese elderly cohort study in Hong Kong. *Prev Med* 2014; **64**: 20-6.
100. Tsilidis KK, Allen NE, Appleby PN, et al. Diabetes mellitus and risk of prostate cancer in the European Prospective Investigation into Cancer and Nutrition. *Int J Cancer* 2015; **136**(2): 372-81.
101. Sekikawa A, Fukui H, Maruo T, Tsumura T, Okabe Y, Osaki Y. Diabetes mellitus increases the risk of early gastric cancer development. *Eur J Cancer* 2014; **50**(12): 2065-71.
102. Yang WS, Yang Y, Yang G, et al. Pre-existing type 2 diabetes and risk of lung cancer: a report from two prospective cohort studies of 133 024 Chinese adults in urban Shanghai. *BMJ Open* 2014; **4**(7): e004875.
103. De Bruijn KM, Ruiter R, de Keyser CE, Hofman A, Stricker BH, van Eijck CH. Detection bias may be the main cause of increased cancer incidence among diabetics: results from the Rotterdam Study. *Eur J Cancer* 2014; **50**(14): 2449-55.
104. Luo J, Beresford S, Chen C, et al. Association between diabetes, diabetes treatment and risk of developing endometrial cancer. *Br J Cancer* 2014; **111**(7): 1432-9.
105. Gordon-Dseagu VL, Shelton N, Mindell J. Diabetes mellitus and mortality from all-causes, cancer, cardiovascular and respiratory disease: evidence from the Health Survey for England and Scottish Health Survey cohorts. *J Diabetes Complications* 2014; **28**(6): 791-7.
106. Setiawan VW, Hernandez BY, Lu SC, et al. Diabetes and racial/ethnic differences in hepatocellular carcinoma risk: the multiethnic cohort. *J Natl Cancer Inst* 2014; **106**(12).
107. Xu HL, Tan YT, Epplen M, et al. Population-based cohort studies of type 2 diabetes and stomach cancer risk in Chinese men and women. *Cancer Sci* 2015; **106**(3): 294-8.
108. Liu X, Hemminki K, Forsti A, Sundquist K, Sundquist J, Ji J. Cancer risk in patients with type 2 diabetes mellitus and their relatives. *Int J Cancer* 2015; **137**(4): 903-10.
109. Goossens ME, Zeegers MP, Bazelier MT, De Bruin ML, Buntinx F, de Vries F. Risk of bladder cancer in patients with diabetes: a retrospective cohort study. *BMJ Open* 2015; **5**(6): e007470.
110. Best LG, Garcia-Esquinas E, Yeh JL, et al. Association of diabetes and cancer mortality in American Indians: the Strong Heart Study. *Cancer Causes Control* 2015; **26**(11): 1551-60.
111. Valent F. Diabetes mellitus and cancer of the digestive organs: An Italian population-based cohort study. *J Diabetes Complications* 2015; **29**(8): 1056-61.
112. Lu Y, Garcia Rodriguez LA, Malgerud L, et al. New-onset type 2 diabetes, elevated HbA1c, anti-diabetic medications, and risk of pancreatic cancer. *Br J Cancer* 2015; **113**(11): 1607-14.
113. Luo J, Phillips L, Liu S, Wactawski-Wende J, Margolis KL. Diabetes, Diabetes Treatment, and Risk of Thyroid Cancer. *J Clin Endocrinol Metab* 2016; **101**(3): 1243-8.
114. Gini A, Bidoli E, Zanier L, et al. Cancer among patients with type 2 diabetes mellitus: A population-based cohort study in northeastern Italy. *Cancer Epidemiol* 2016; **41**: 80-7.
115. de Kort S, Simons CC, van den Brandt PA, et al. Diabetes mellitus type 2 and subsite-specific colorectal cancer risk in men and women: results from the Netherlands Cohort Study on diet and cancer. *Eur J Gastroenterol Hepatol* 2016; **28**(8): 896-903.

116. Petrick JL, Freedman ND, Demuth J, et al. Obesity, diabetes, serum glucose, and risk of primary liver cancer by birth cohort, race/ethnicity, and sex: Multiphasic health checkup study. *Cancer Epidemiol* 2016; **42**: 140-6.
117. Dankner R, Boffetta P, Balicer RD, et al. Time-Dependent Risk of Cancer After a Diabetes Diagnosis in a Cohort of 2.3 Million Adults. *Am J Epidemiol* 2016; **183**(12): 1098-106.
118. Lega IC, Wilton AS, Austin PC, Fischer HD, Johnson JA, Lipscombe LL. The temporal relationship between diabetes and cancer: A population-based study. *Cancer* 2016; **122**(17): 2731-8.
119. Haggstrom C, Van Hemelrijck M, Zethelius B, et al. Prospective study of Type 2 diabetes mellitus, anti-diabetic drugs and risk of prostate cancer. *Int J Cancer* 2017; **140**(3): 611-7.
120. Choi JB, Moon HW, Park YH, et al. The Impact of Diabetes on the Risk of Prostate Cancer Development according to Body Mass Index: A 10-year Nationwide Cohort Study. *J Cancer* 2016; **7**(14): 2061-6.
121. Pang Y, Kartsonaki C, Guo Y, et al. Diabetes, plasma glucose and incidence of pancreatic cancer: A prospective study of 0.5 million Chinese adults and a meta-analysis of 22 cohort studies. *Int J Cancer* 2017; **140**(8): 1781-8.
122. Maskarinec G, Jacobs S, Park SY, et al. Type II Diabetes, Obesity, and Breast Cancer Risk: The Multiethnic Cohort. *Cancer Epidemiol Biomarkers Prev* 2017; **26**(6): 854-61.
123. Kasmari AJ, Welch A, Liu G, Leslie D, McGarrity T, Riley T. Independent of Cirrhosis, Hepatocellular Carcinoma Risk Is Increased with Diabetes and Metabolic Syndrome. *Am J Med* 2017; **130**(6): 746 e1- e7.
124. Bragg F, Holmes MV, Iona A, et al. Association Between Diabetes and Cause-Specific Mortality in Rural and Urban Areas of China. *JAMA* 2017; **317**(3): 280-9.
125. Yang WS, Chen PC, Lin HJ, et al. Association between type 2 diabetes and cancer incidence in Taiwan: data from a prospective community-based cohort study. *Acta Diabetol* 2017; **54**(5): 455-61.
126. de Kort S, Masclee AAM, Sanduleanu S, et al. Higher risk of colorectal cancer in patients with newly diagnosed diabetes mellitus before the age of colorectal cancer screening initiation. *Sci Rep* 2017; **7**: 46527.
127. de Jong R, Burden AM, de Kort S, et al. Impact of detection bias on the risk of gastrointestinal cancer and its subsites in type 2 diabetes mellitus. *Eur J Cancer* 2017; **79**: 61-71.
128. Drake I, Gullberg B, Sonestedt E, et al. Type 2 diabetes, adiposity and cancer morbidity and mortality risk taking into account competing risk of noncancer deaths in a prospective cohort setting. *Int J Cancer* 2017; **141**(6): 1170-80.
129. Tsujimoto T, Kajio H, Sugiyama T. Favourable changes in mortality in people with diabetes: US NHANES 1999-2010. *Diabetes Obes Metab* 2018; **20**(1): 85-93.
130. Ballotari P, Vicentini M, Manicardi V, et al. Diabetes and risk of cancer incidence: results from a population-based cohort study in northern Italy. *BMC Cancer* 2017; **17**(1): 703.
131. Chen CB, Eurich DT, Majumdar SR, Johnson JA. Risk of prostate cancer across different racial/ethnic groups in men with diabetes: a retrospective cohort study. *Diabet Med* 2018; **35**(1): 107-11.
132. Palmer JR, Castro-Webb N, Bertrand K, Bethea TN, Denis GV. Type II Diabetes and Incidence of Estrogen Receptor Negative Breast Cancer in African American Women. *Cancer Res* 2017; **77**(22): 6462-9.
133. Simon TG, King LY, Chong DQ, et al. Diabetes, metabolic comorbidities, and risk of hepatocellular carcinoma: Results from two prospective cohort studies. *Hepatology* 2018; **67**(5): 1797-806.
134. He X, Shi L, Wu J. Retrospective database analysis of cancer risk in patients with type 2 diabetes mellitus in China. *Curr Med Res Opin* 2018; **34**(6): 1089-98.

135. Pan XF, He M, Yu C, et al. Type 2 Diabetes and Risk of Incident Cancer in China: A Prospective Study Among 0.5 Million Chinese Adults. *Am J Epidemiol* 2018; **187**(7): 1380-91.
136. Bao C, Pedersen NL, Yang R, et al. Diabetes in midlife and risk of cancer in late life: A nationwide Swedish twin study. *Int J Cancer* 2018; **143**(4): 793-800.
137. Li M, Roder D, McDermott R. Diabetes and smoking as predictors of cancer in Indigenous adults from rural and remote communities of North Queensland - A 15-year follow up study. *Int J Cancer* 2018; **143**(5): 1054-61.
138. Graff RE, Sanchez A, Tobias DK, et al. Type 2 Diabetes in Relation to the Risk of Renal Cell Carcinoma Among Men and Women in Two Large Prospective Cohort Studies. *Diabetes Care* 2018; **41**(7): 1432-7.
139. de Jong R, Peeters P, Burden AM, et al. Gastrointestinal cancer incidence in type 2 diabetes mellitus; results from a large population-based cohort study in the UK. *Cancer Epidemiol* 2018; **54**: 104-11.
140. Pang Y, Kartsonaki C, Turnbull I, et al. Diabetes, Plasma Glucose, and Incidence of Fatty Liver, Cirrhosis, and Liver Cancer: A Prospective Study of 0.5 Million People. *Hepatology* 2018; **68**(4): 1308-18.
141. Lee DY, Yu JH, Park S, et al. The influence of diabetes and antidiabetic medications on the risk of pancreatic cancer: a nationwide population-based study in Korea. *Sci Rep* 2018; **8**(1): 9719.
142. Pang Y, Kartsonaki C, Guo Y, et al. Diabetes, plasma glucose and incidence of colorectal cancer in Chinese adults: a prospective study of 0.5 million people. *J Epidemiol Community Health* 2018; **72**(10): 919-25.
143. Miller EA, Pinsky PF, Pierre-Victor D. The relationship between diabetes, prostate-specific antigen screening tests, and prostate cancer. *Cancer Causes Control* 2018; **29**(10): 907-14.
144. Ma Y, Yang W, Song M, et al. Type 2 diabetes and risk of colorectal cancer in two large U.S. prospective cohorts. *Br J Cancer* 2018; **119**(11): 1436-42.

## PRISMA checklist

| Section/topic                      | #  | Checklist item                                                                                                                                                                                                                                                                                              | Reported on page # |
|------------------------------------|----|-------------------------------------------------------------------------------------------------------------------------------------------------------------------------------------------------------------------------------------------------------------------------------------------------------------|--------------------|
| <b>TITLE</b>                       |    |                                                                                                                                                                                                                                                                                                             |                    |
| Title                              | 1  | Identify the report as a systematic review, meta-analysis, or both.                                                                                                                                                                                                                                         | 1                  |
| <b>ABSTRACT</b>                    |    |                                                                                                                                                                                                                                                                                                             |                    |
| Structured summary                 | 2  | Provide a structured summary including, as applicable: background; objectives; data sources; study eligibility criteria, participants, and interventions; study appraisal and synthesis methods; results; limitations; conclusions and implications of key findings; systematic review registration number. | 2                  |
| <b>INTRODUCTION</b>                |    |                                                                                                                                                                                                                                                                                                             |                    |
| Rationale                          | 3  | Describe the rationale for the review in the context of what is already known.                                                                                                                                                                                                                              | 3                  |
| Objectives                         | 4  | Provide an explicit statement of questions being addressed with reference to participants, interventions, comparisons, outcomes, and study design (PICOS).                                                                                                                                                  | 3, 4               |
| <b>METHODS</b>                     |    |                                                                                                                                                                                                                                                                                                             |                    |
| Protocol and registration          | 5  | Indicate if a review protocol exists, if and where it can be accessed (e.g., Web address), and, if available, provide registration information including registration number.                                                                                                                               | NA                 |
| Eligibility criteria               | 6  | Specify study characteristics (e.g., PICOS, length of follow-up) and report characteristics (e.g., years considered, language, publication status) used as criteria for eligibility, giving rationale.                                                                                                      | 5, 6               |
| Information sources                | 7  | Describe all information sources (e.g., databases with dates of coverage, contact with study authors to identify additional studies) in the search and date last searched.                                                                                                                                  | 5                  |
| Search                             | 8  | Present full electronic search strategy for at least one database, including any limits used, such that it could be repeated.                                                                                                                                                                               | 5, Figure S1       |
| Study selection                    | 9  | State the process for selecting studies (i.e., screening, eligibility, included in systematic review, and, if applicable, included in the meta-analysis).                                                                                                                                                   | 5                  |
| Data collection process            | 10 | Describe method of data extraction from reports (e.g., piloted forms, independently, in duplicate) and any processes for obtaining and confirming data from investigators.                                                                                                                                  | 5                  |
| Data items                         | 11 | List and define all variables for which data were sought (e.g., PICOS, funding sources) and any assumptions and simplifications made.                                                                                                                                                                       | 5, 6               |
| Risk of bias in individual studies | 12 | Describe methods used for assessing risk of bias of individual studies (including specification of whether this was done at the study or outcome level), and how this information is to be used in any data synthesis.                                                                                      | 6-8                |
| Summary measures                   | 13 | State the principal summary measures (e.g., risk ratio, difference in means).                                                                                                                                                                                                                               | 6-8                |
| Synthesis of results               | 14 | Describe the methods of handling data and combining results of studies, if done, including measures of consistency (e.g., $I^2$ ) for each meta-analysis.                                                                                                                                                   | 6-8                |

| Section/topic                 | #  | Checklist item                                                                                                                                                                                           | Reported on page #                                 |
|-------------------------------|----|----------------------------------------------------------------------------------------------------------------------------------------------------------------------------------------------------------|----------------------------------------------------|
| Risk of bias across studies   | 15 | Specify any assessment of risk of bias that may affect the cumulative evidence (e.g., publication bias, selective reporting within studies).                                                             | 6-8                                                |
| Additional analyses           | 16 | Describe methods of additional analyses (e.g., sensitivity or subgroup analyses, meta-regression), if done, indicating which were pre-specified.                                                         | 6-8                                                |
| <b>RESULTS</b>                |    |                                                                                                                                                                                                          |                                                    |
| Study selection               | 17 | Give numbers of studies screened, assessed for eligibility, and included in the review, with reasons for exclusions at each stage, ideally with a flow diagram.                                          | 9, Figure S1, Table S1                             |
| Study characteristics         | 18 | For each study, present characteristics for which data were extracted (e.g., study size, PICOS, follow-up period) and provide the citations.                                                             | 9, Table S2                                        |
| Risk of bias within studies   | 19 | Present data on risk of bias of each study and, if available, any outcome level assessment (see item 12).                                                                                                | 10, Figure S5, Figure S7                           |
| Results of individual studies | 20 | For all outcomes considered (benefits or harms), present, for each study: (a) simple summary data for each intervention group (b) effect estimates and confidence intervals, ideally with a forest plot. | 10, Figure S4, Figure S6                           |
| Synthesis of results          | 21 | Present results of each meta-analysis done, including confidence intervals and measures of consistency.                                                                                                  | 10-13, Figure 1-3                                  |
| Risk of bias across studies   | 22 | Present results of any assessment of risk of bias across studies (see Item 15).                                                                                                                          | 10-13, Figure S3-4, Figure S6                      |
| Additional analysis           | 23 | Give results of additional analyses, if done (e.g., sensitivity or subgroup analyses, meta-regression [see Item 16]).                                                                                    | 10-13, Table S3-6, Figure 1, Figure 3, Figure S6-9 |
| <b>DISCUSSION</b>             |    |                                                                                                                                                                                                          |                                                    |
| Summary of evidence           | 24 | Summarize the main findings including the strength of evidence for each main outcome; consider their relevance to key groups (e.g., healthcare providers, users, and policy makers).                     | 14                                                 |
| Limitations                   | 25 | Discuss limitations at study and outcome level (e.g., risk of bias), and at review-level (e.g., incomplete retrieval of identified research, reporting bias).                                            | 18                                                 |
| Conclusions                   | 26 | Provide a general interpretation of the results in the context of other evidence, and implications for future research.                                                                                  | 14-19                                              |
| <b>FUNDING</b>                |    |                                                                                                                                                                                                          |                                                    |
| Funding                       | 27 | Describe sources of funding for the systematic review and other support (e.g., supply of data); role of funders for the systematic review.                                                               | 20                                                 |
